# Supplementary material for: Tautomeric Equilibria in Solutions of 2-Phenacylbenzimidazoles
Source: Hindawi journal article supplement (doi:10.1155/2019/4364207), 2019-02-03
Supplement: f1 [file 4364207.f1.doc]

**Heteroatom Chemistry**

***Supporting Information***

**Tautomeric Equilibria in Solutions of 2-Phenacylbenzimidazoles**

Agnieszka Skotnicka,*a Przemysław Czeleń,b Ryszard Gawineckia

a Department of Chemistry, UTP University of Science and Technology, Seminaryjna 3, PL-85-326 Bydgoszcz, Poland

b Department of Physical Chemistry, Collegium Medicum, N. Copernicus University, Kurpińskiego 5, 85-950 Bydgoszcz, Poland

*E-mail: askot@utp.edu.pl

Table of contents

1. NMR spectra of compounds **2a-i** …….....……………………………………...…… S1
2. DFT Cartesians coordinates for **2a**, **2d**, **2i** …...……………………………………. S11


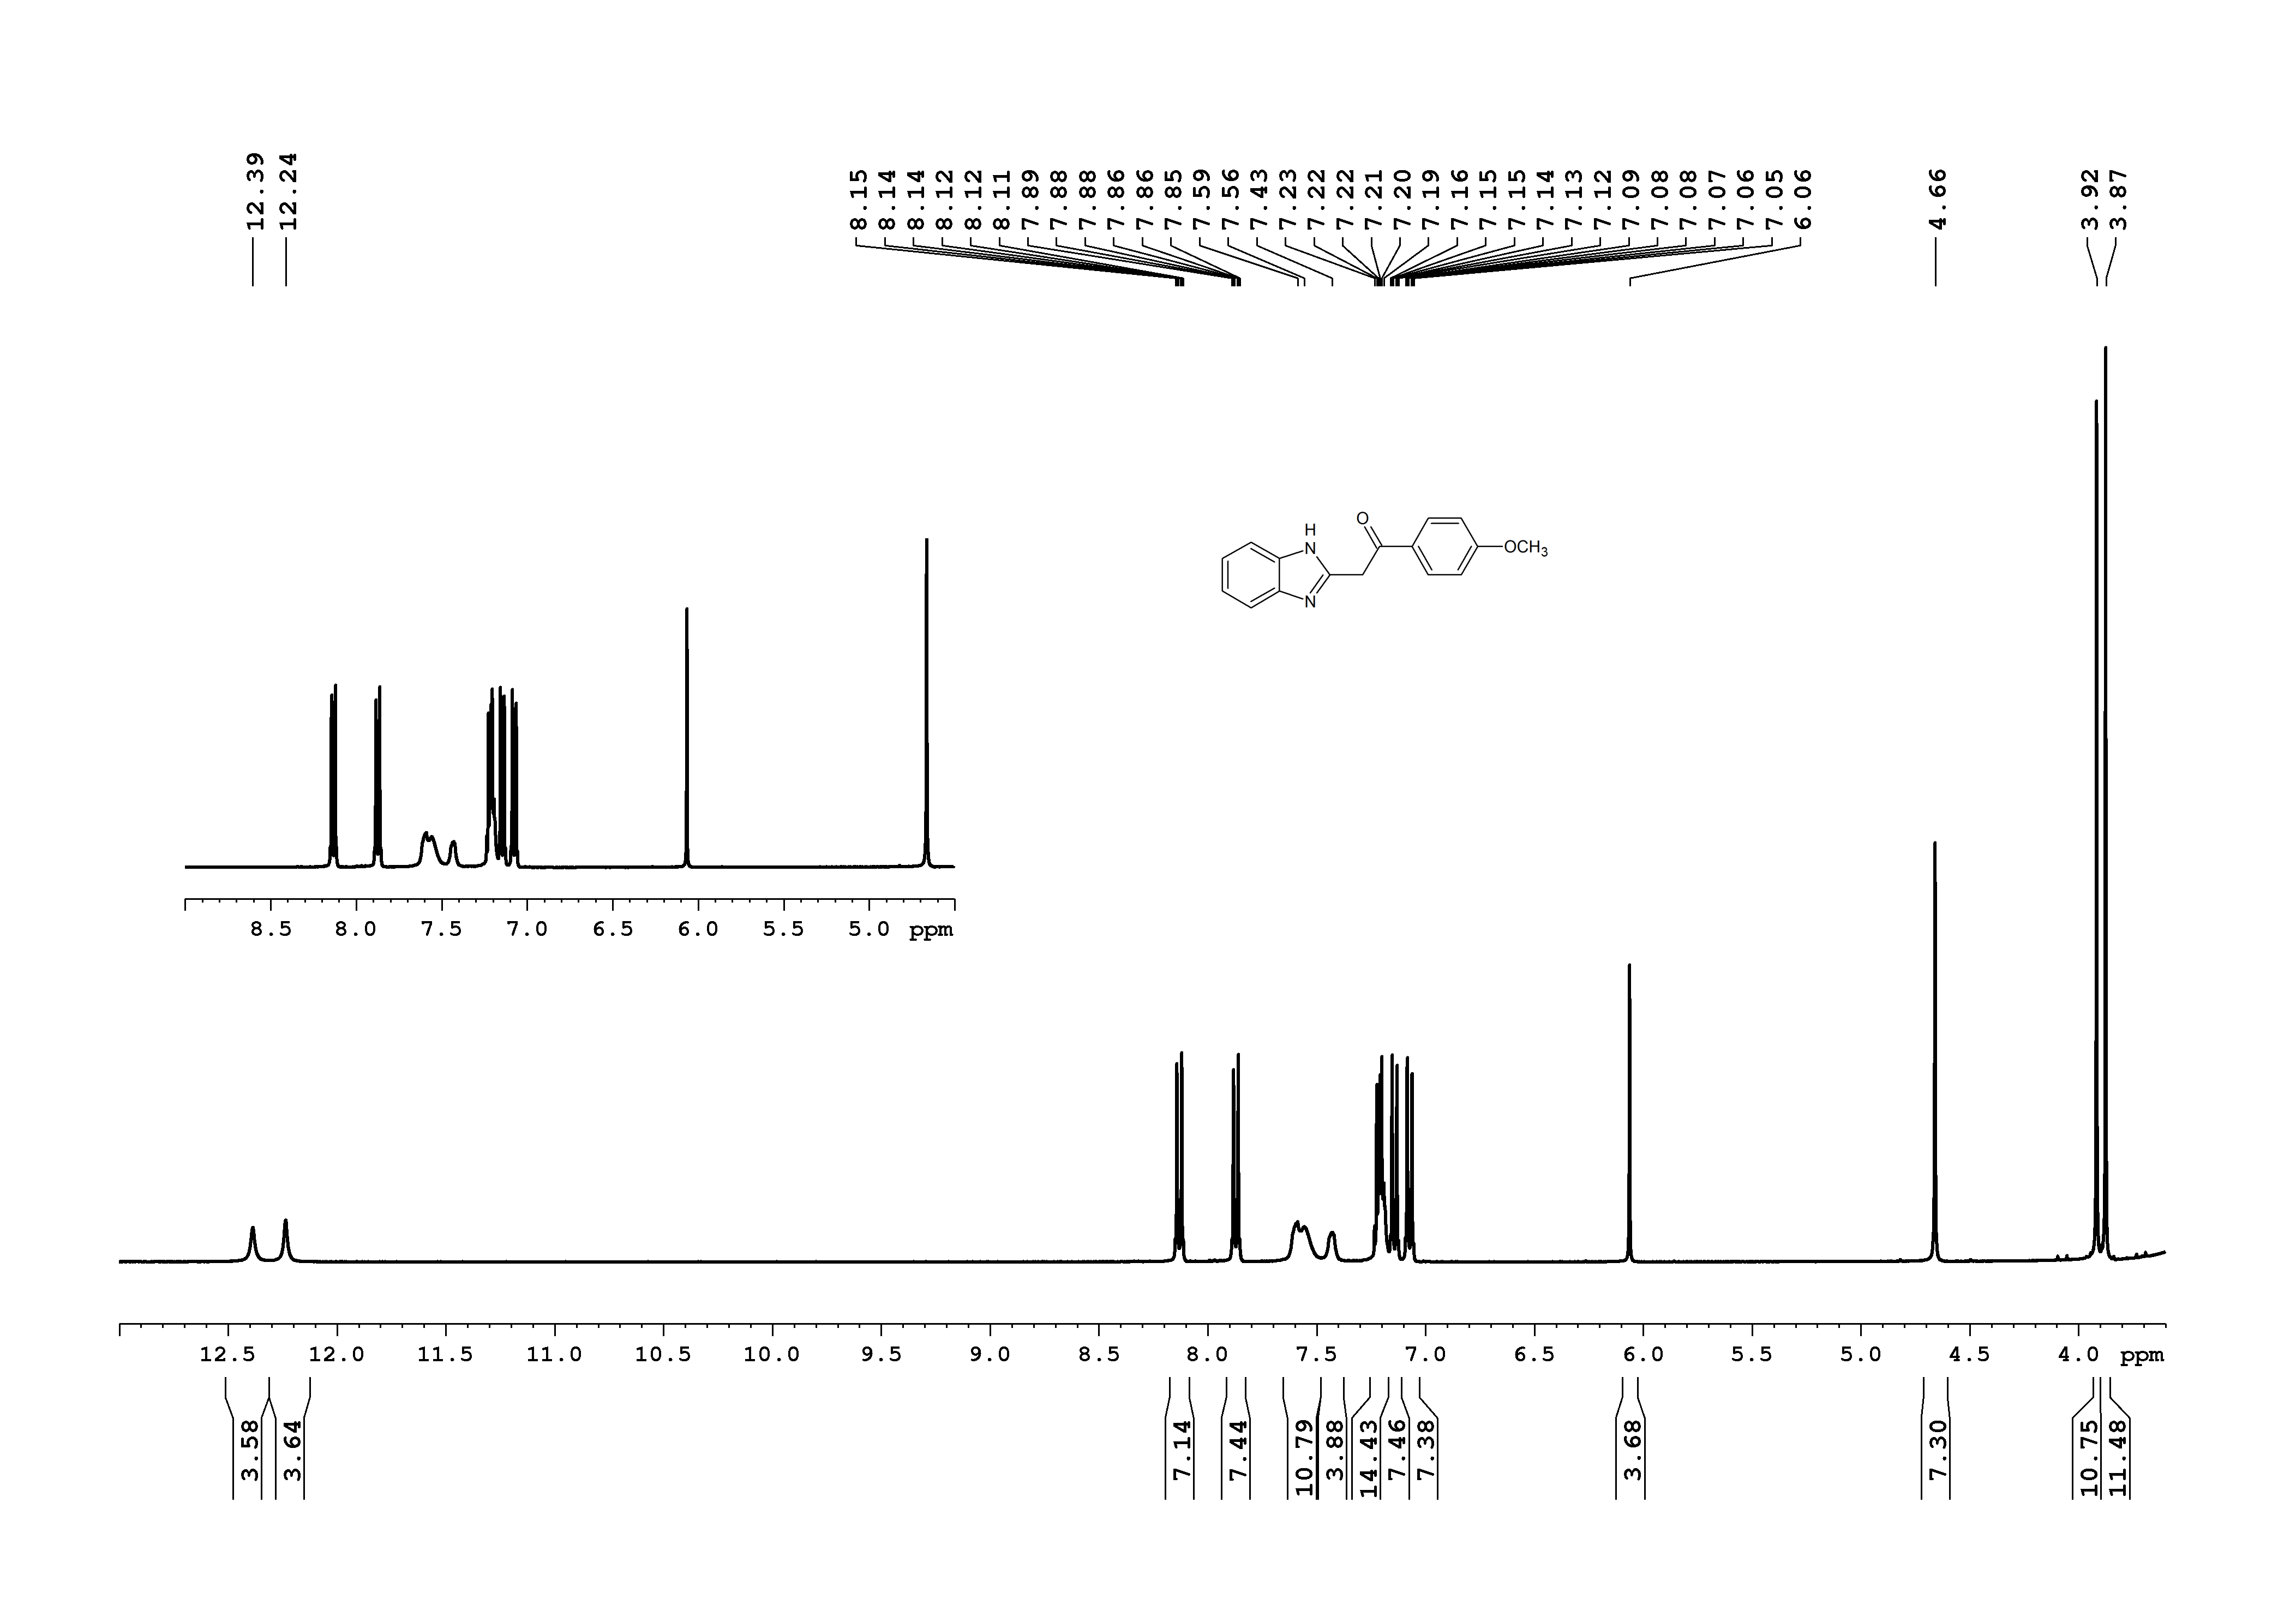


Figure 1. 1H NMR spectrum (400 MHz) of **2a** in DMSO-*d6*.


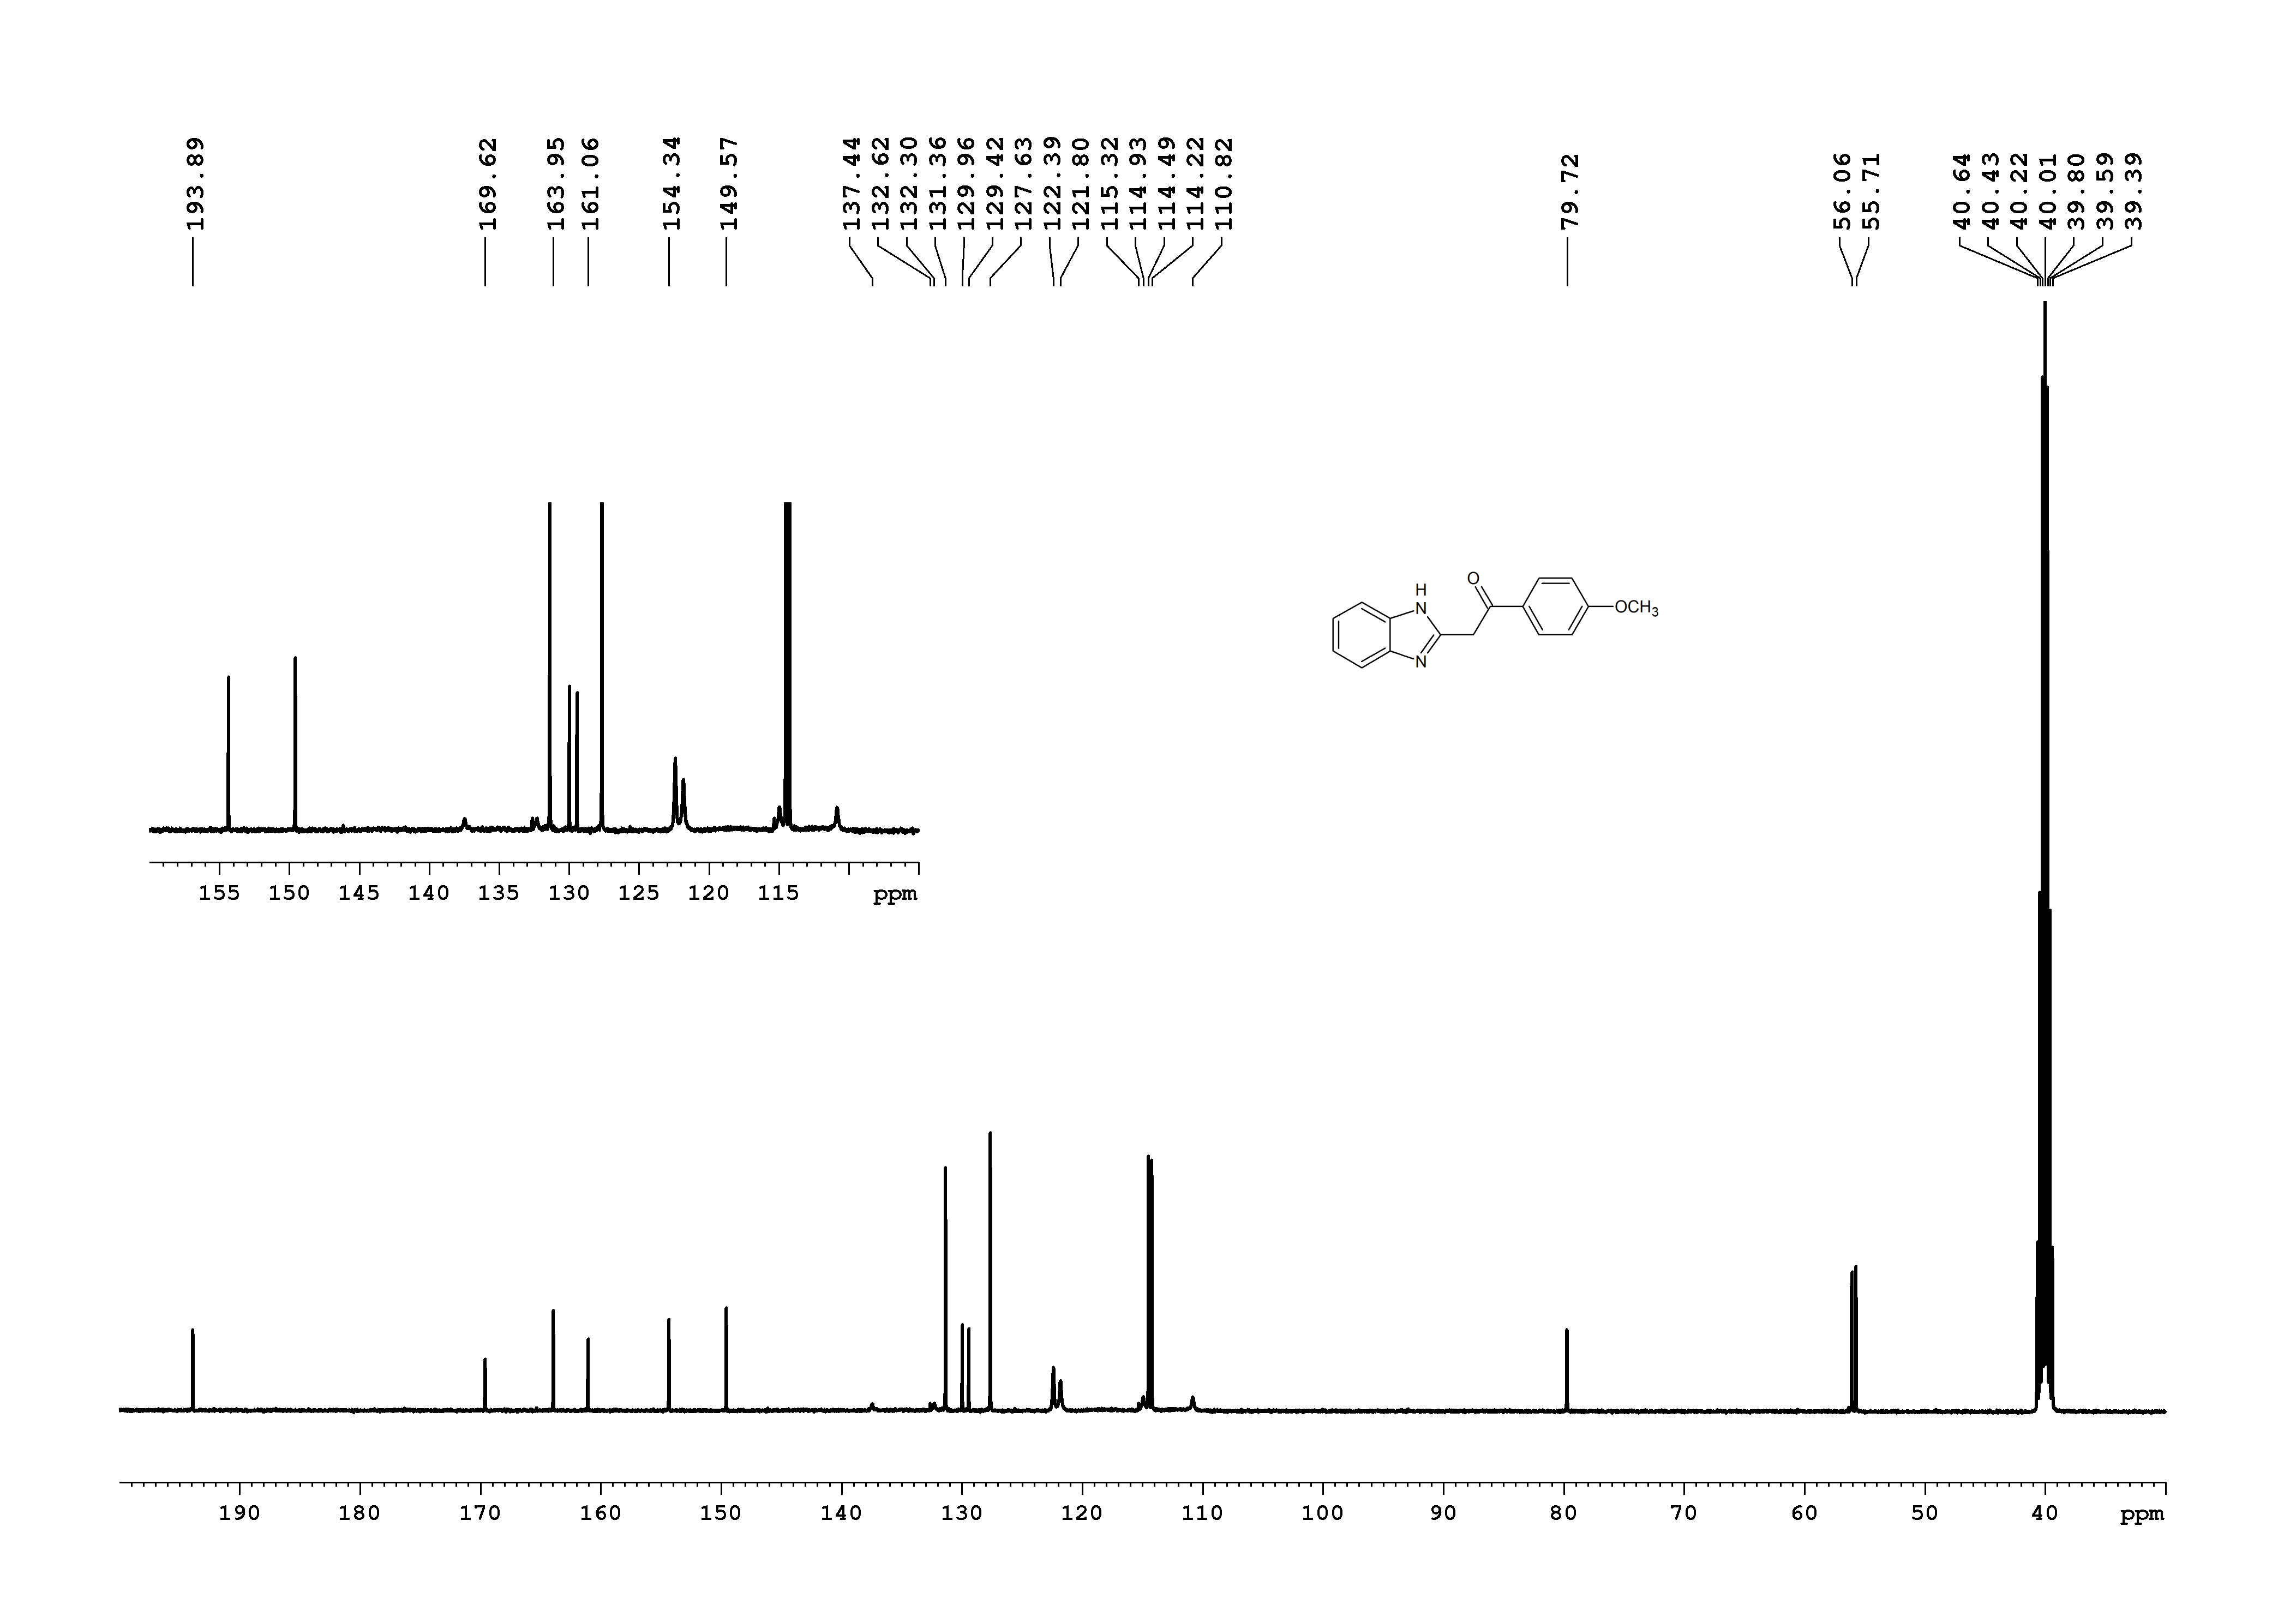


Figure 2. 13C NMR spectrum (400 MHz) of **2a** in DMSO-*d6*.


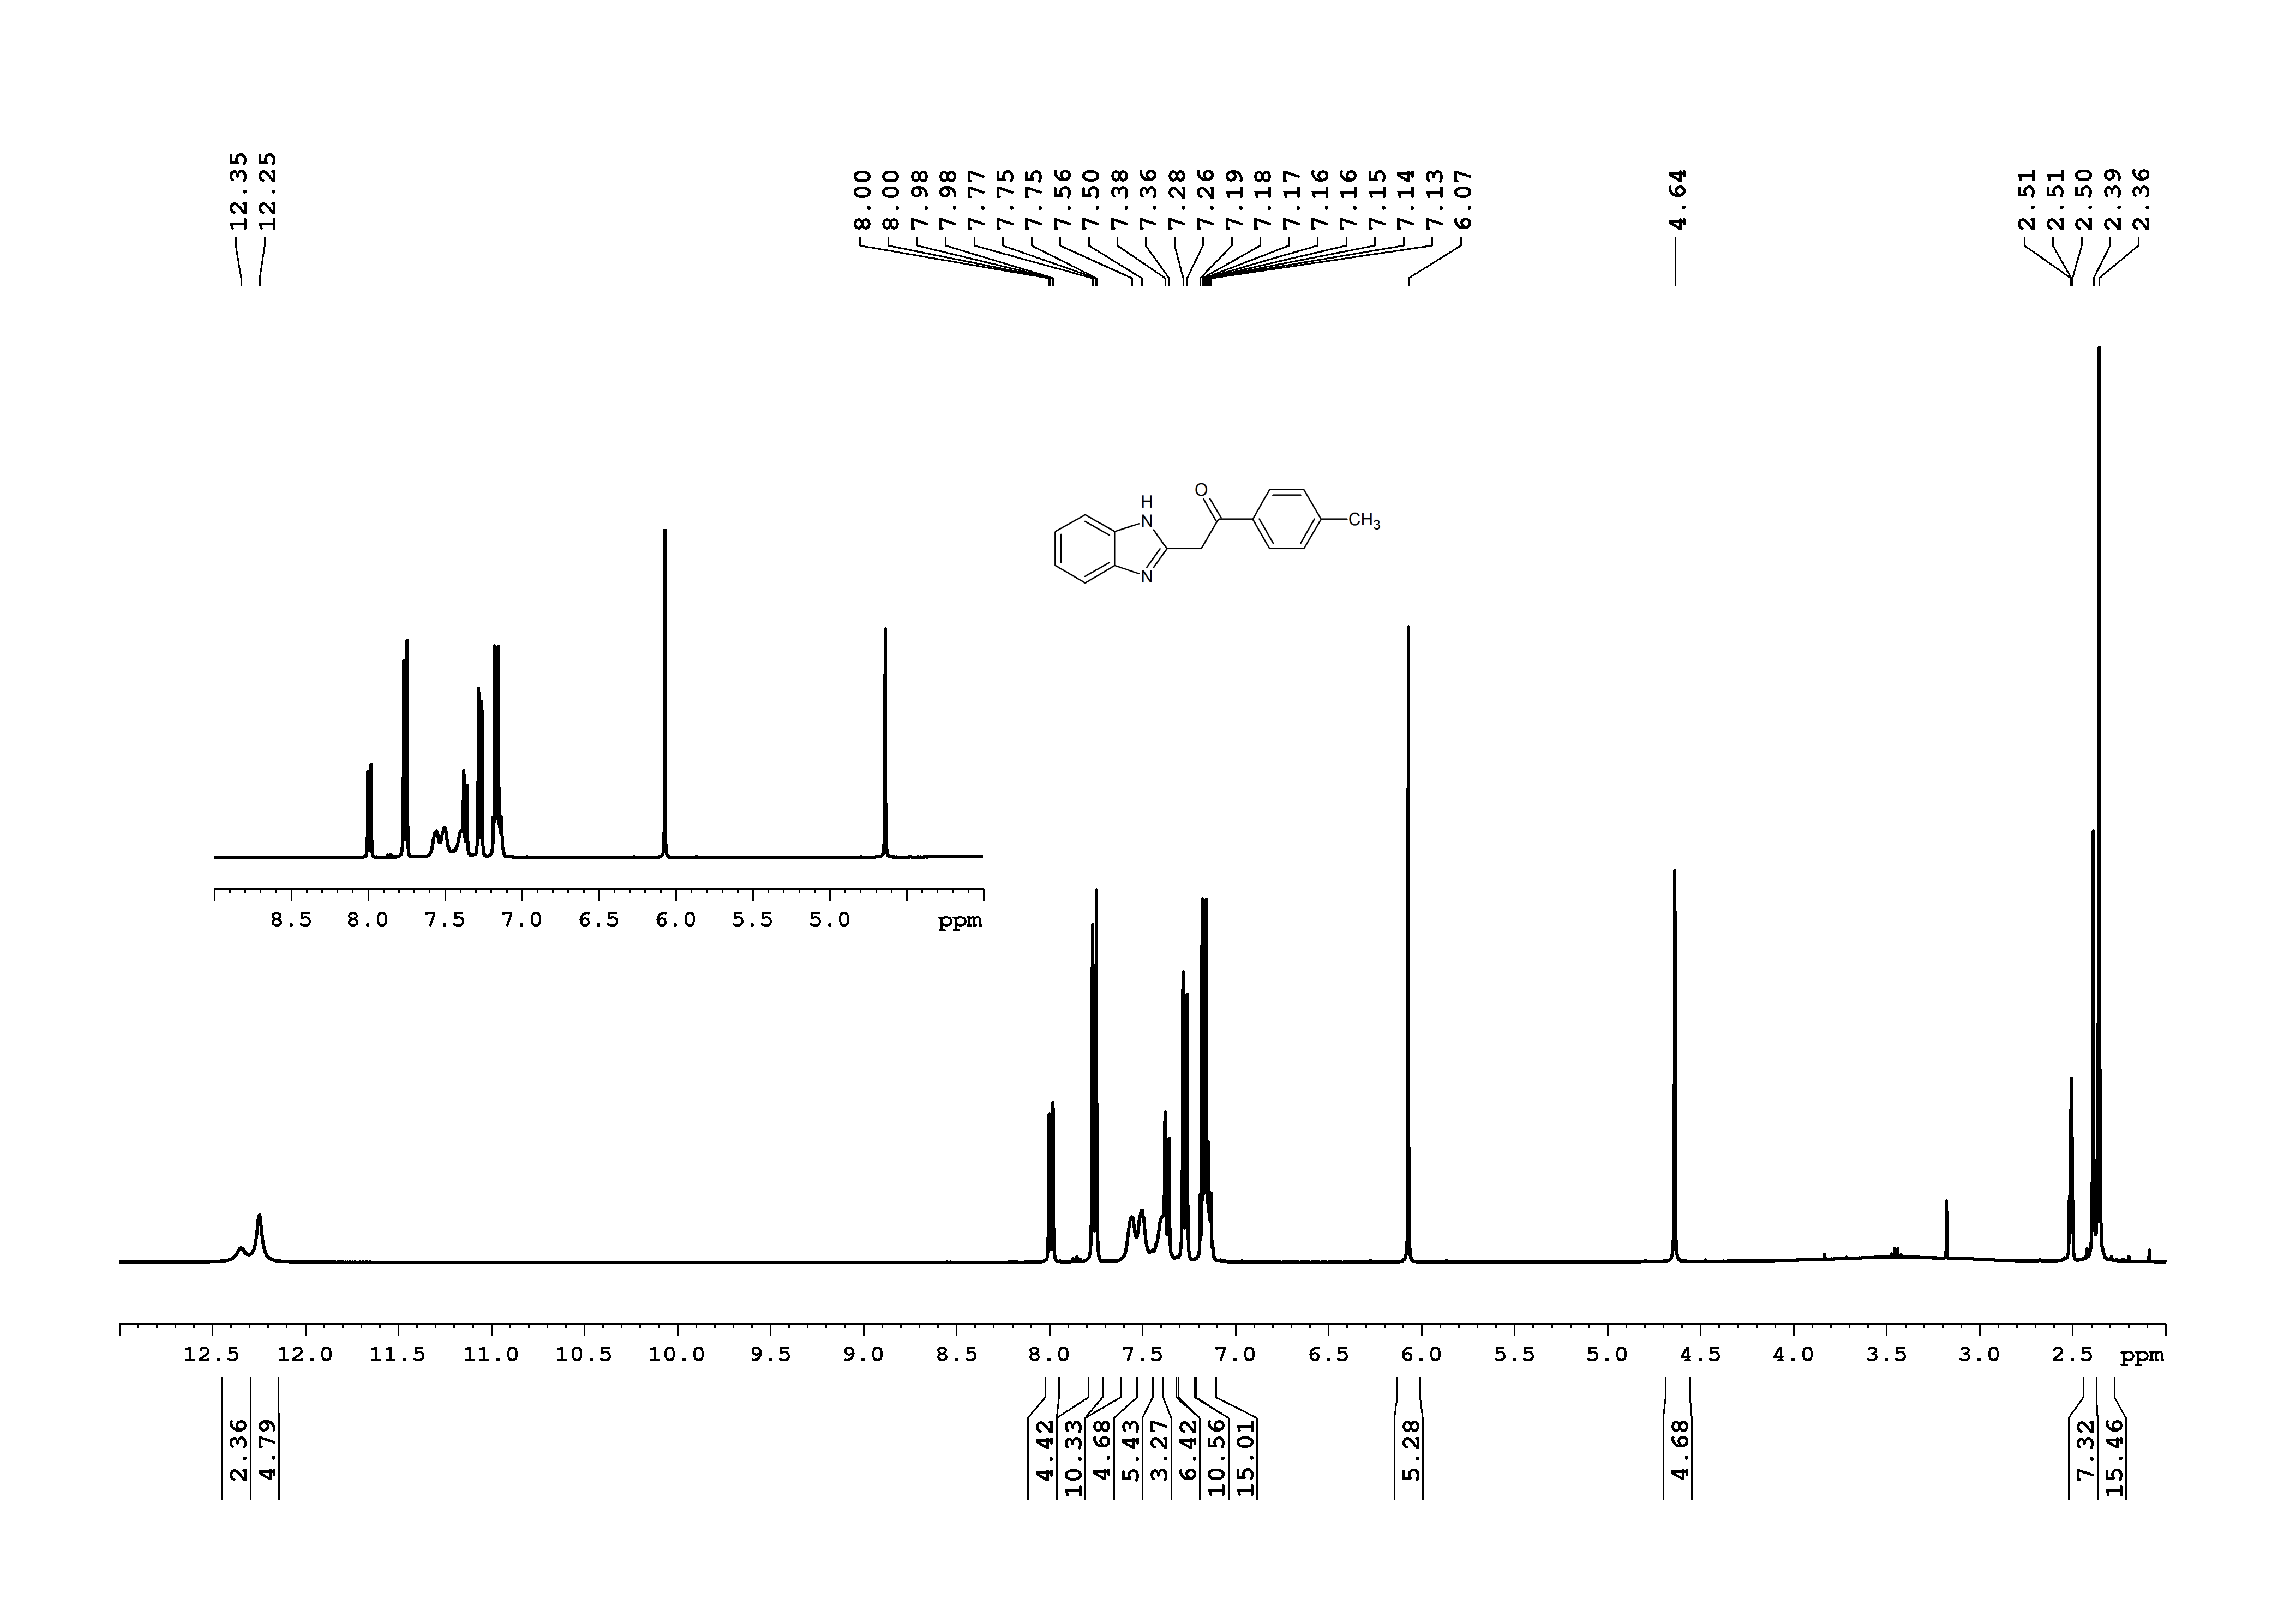


Figure 3. 1H NMR spectrum (400 MHz) of **2b** in DMSO-*d6*.


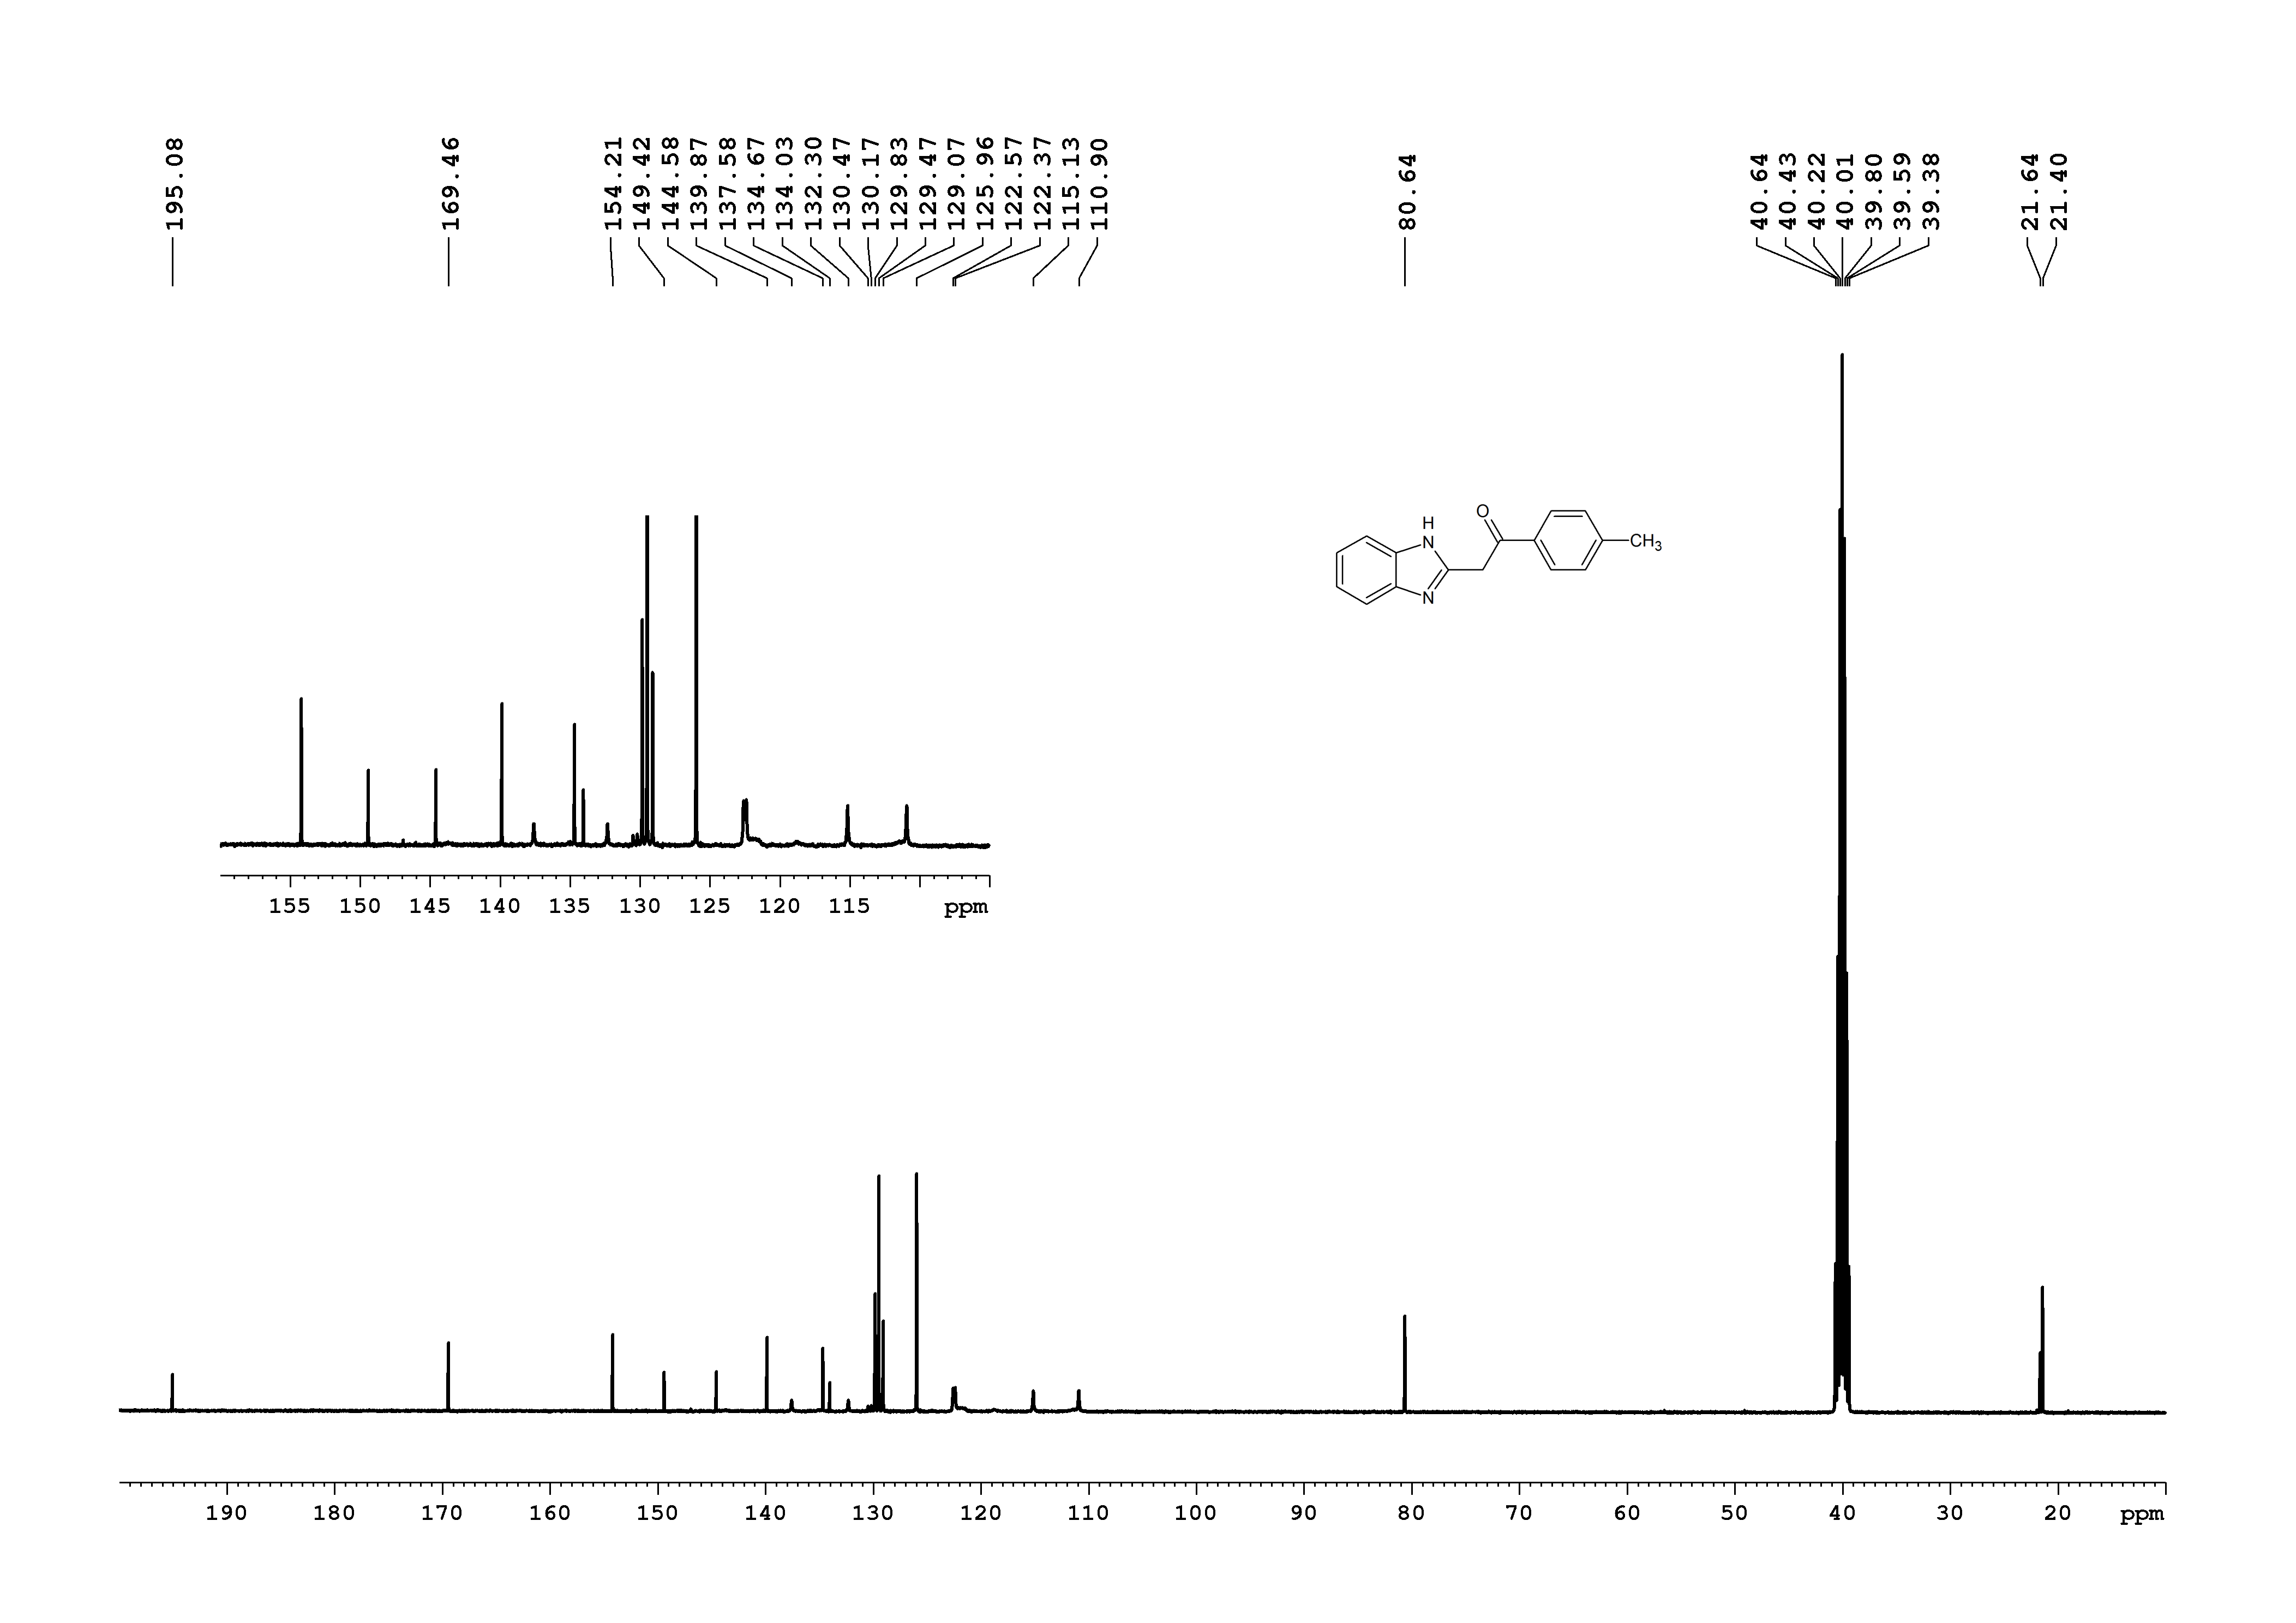


Figure 4. 13C NMR spectrum (400 MHz) of **2b** in DMSO-*d6*.


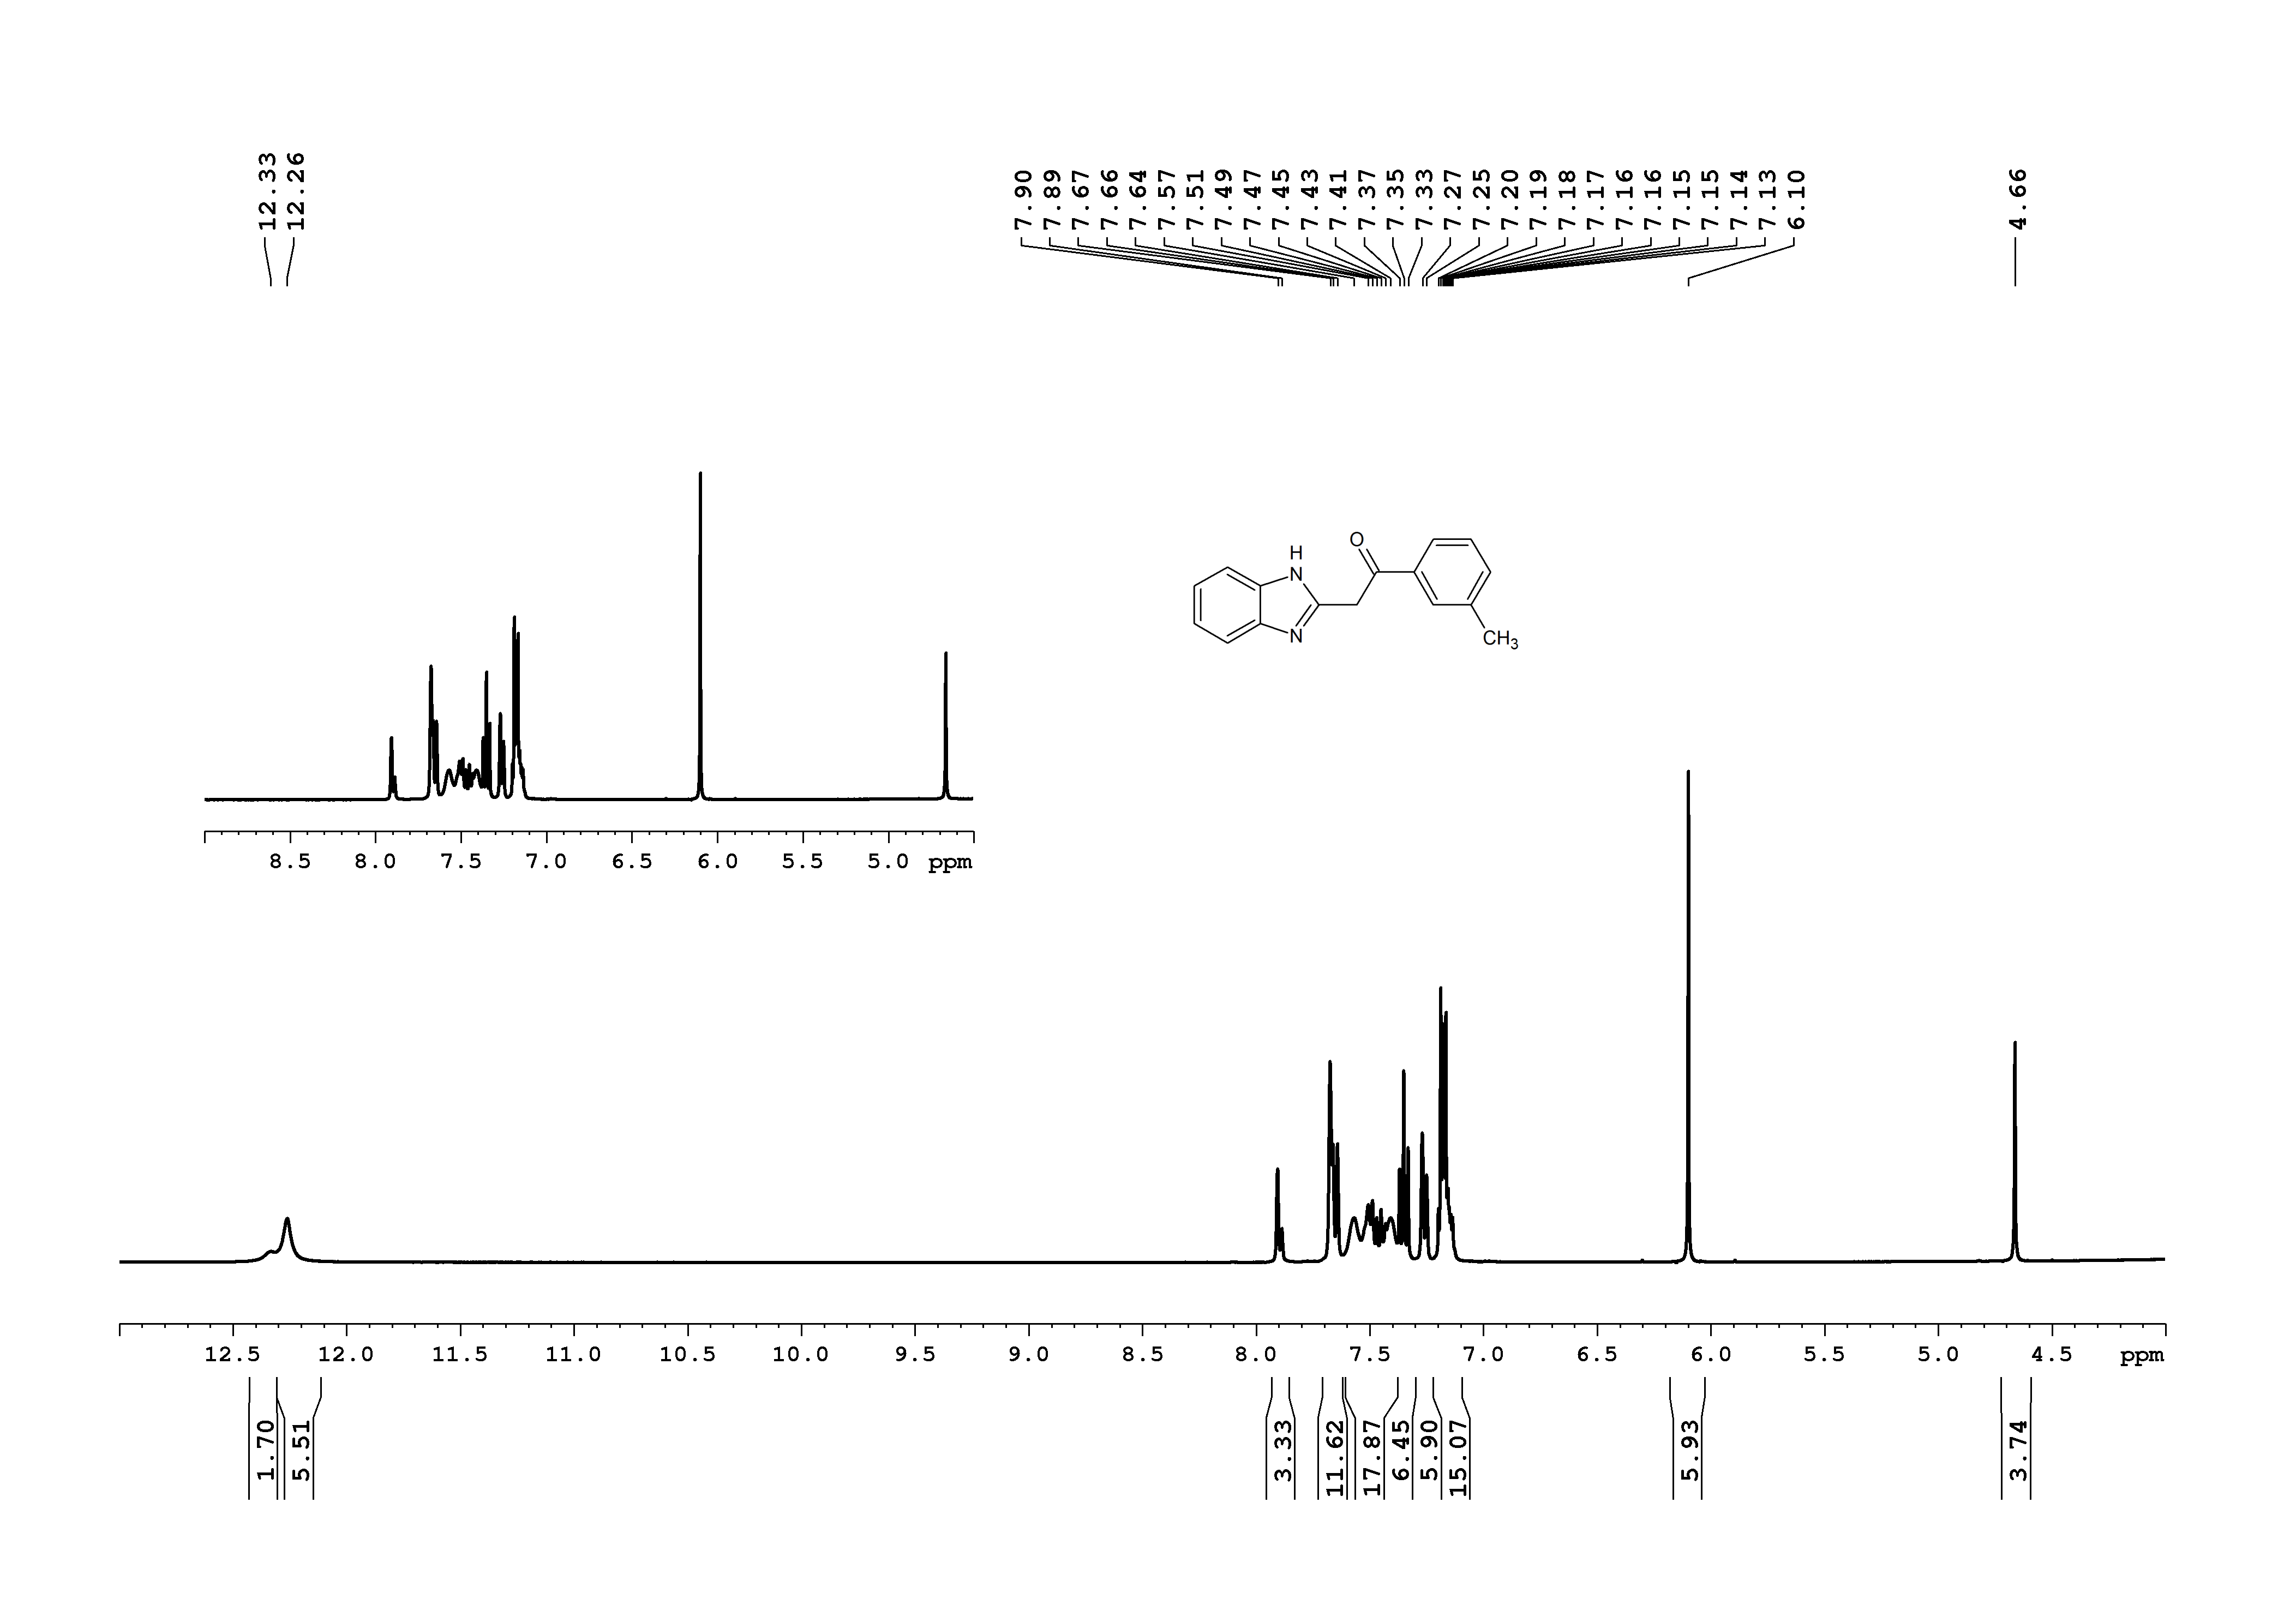


Figure 5. 1H NMR spectrum (400 MHz) of **2c** in DMSO-*d6*.


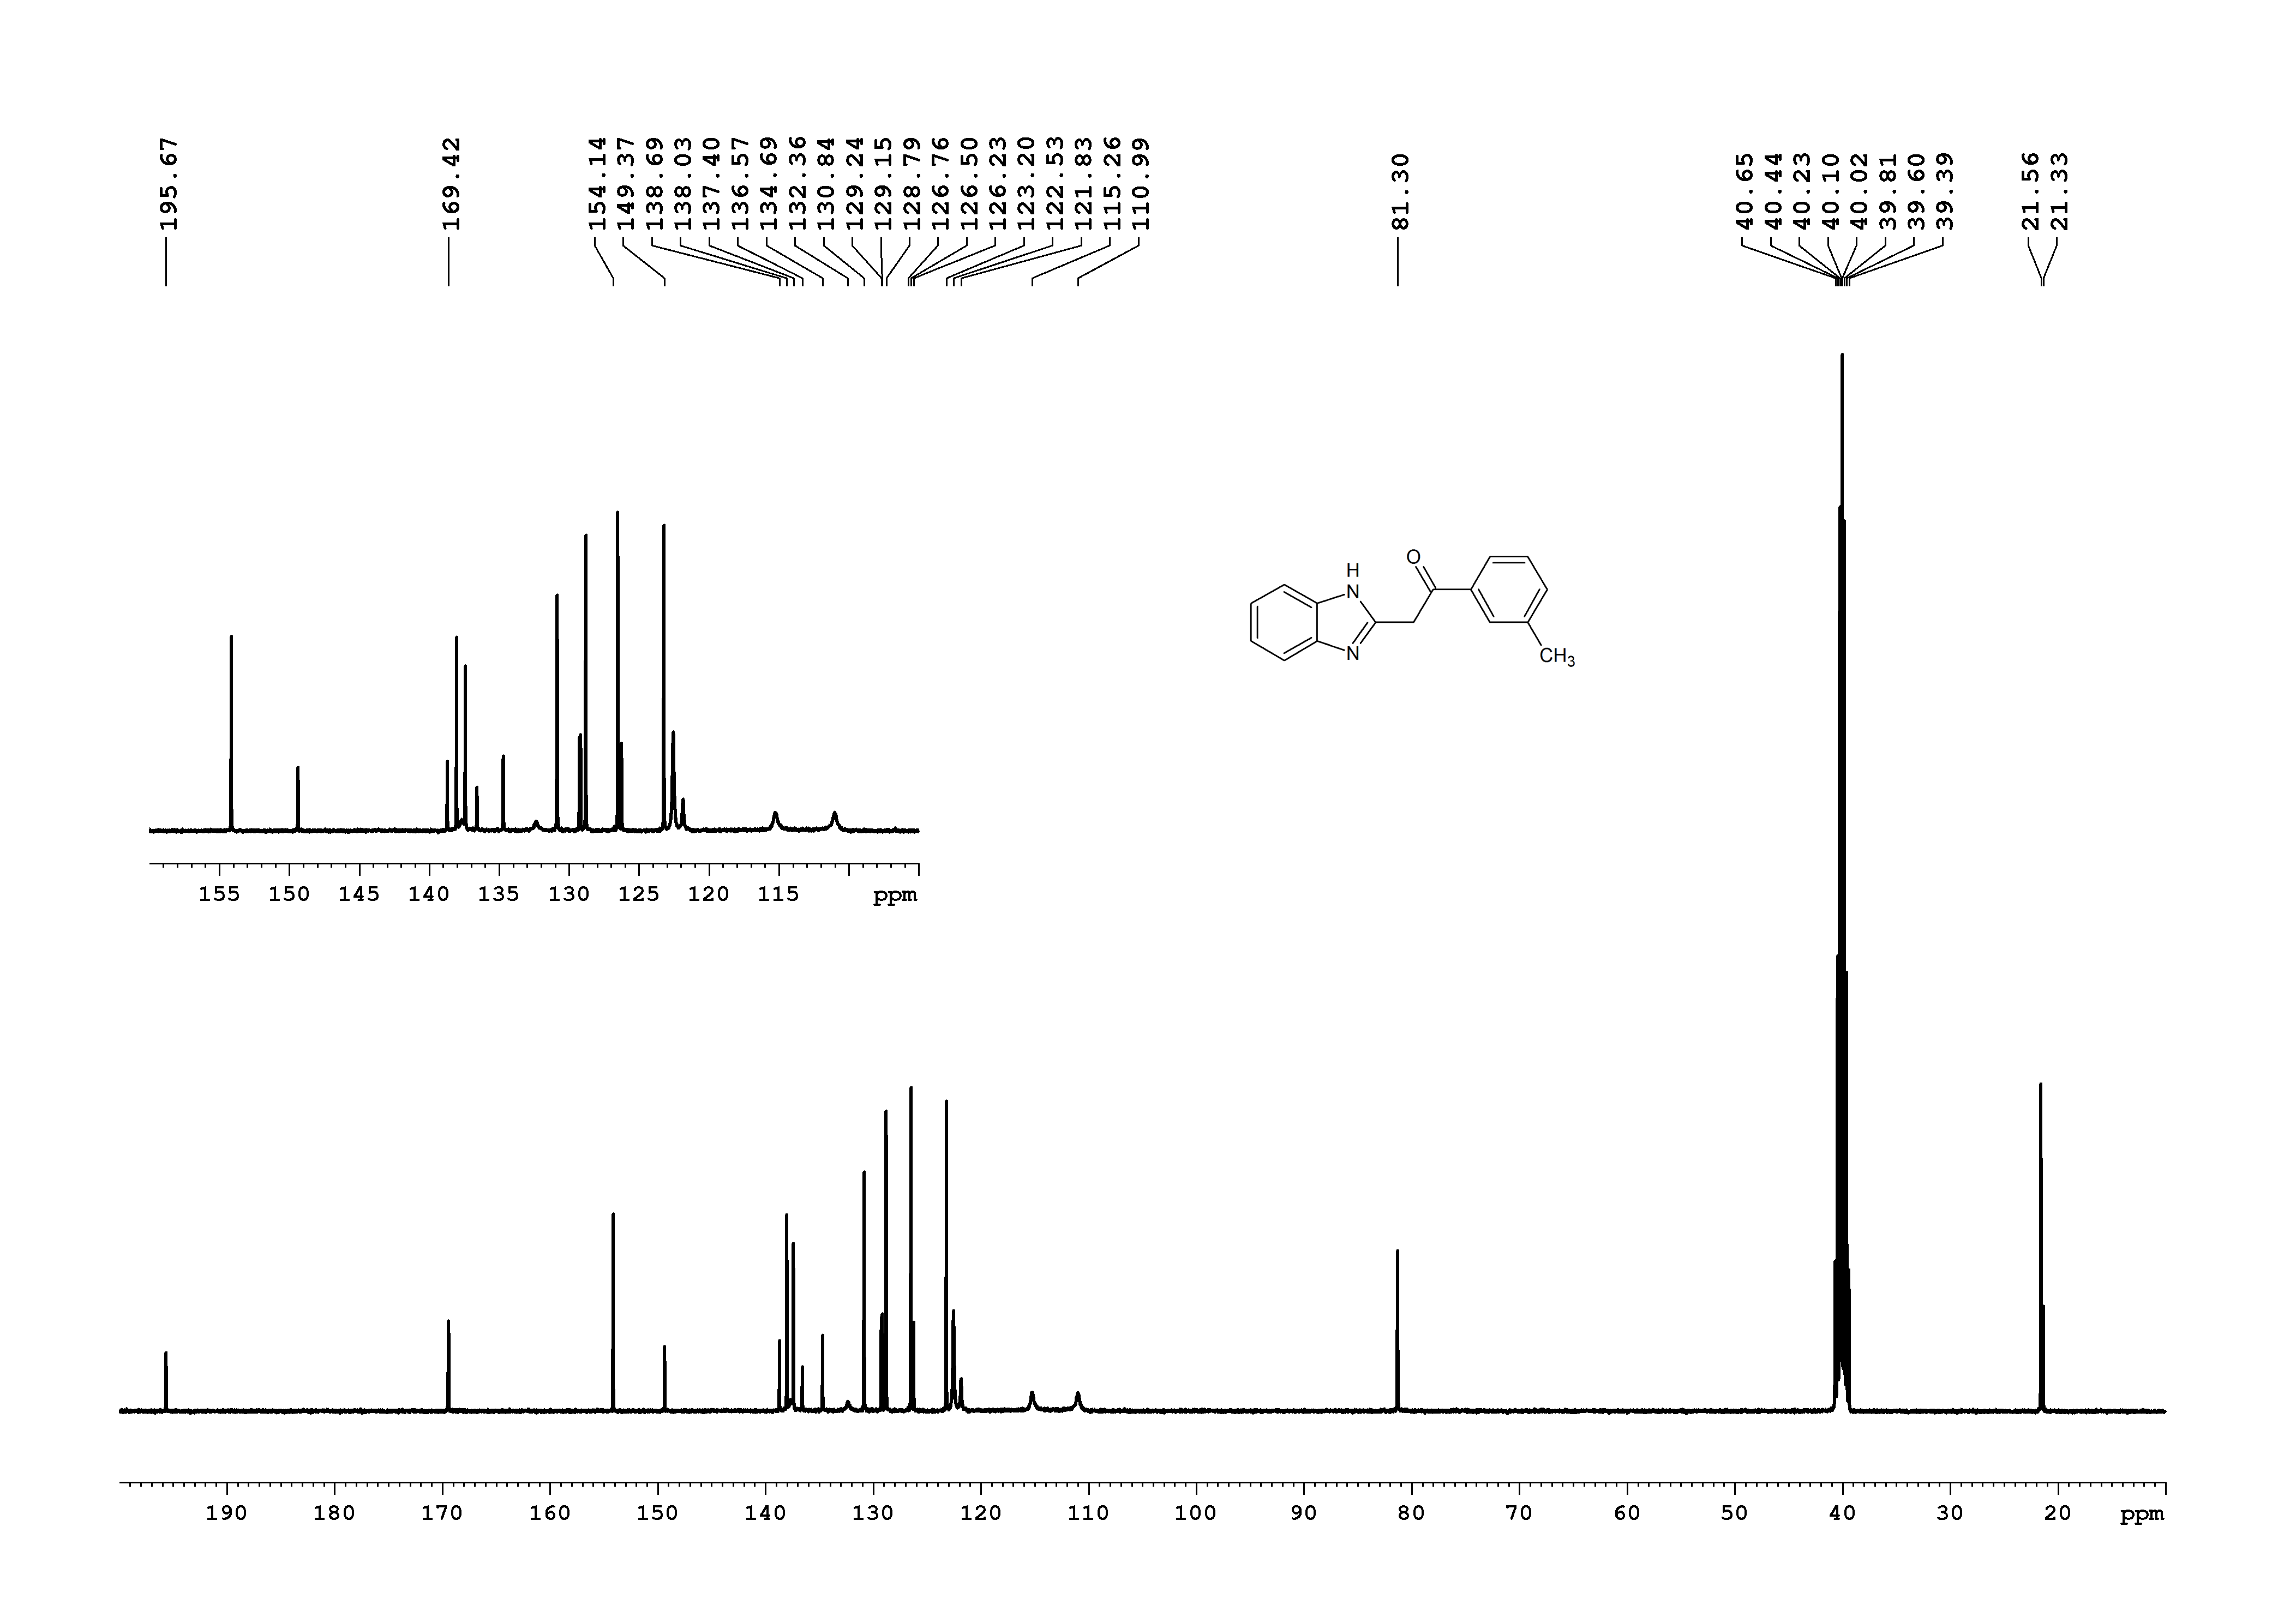


Figure 6. 13C NMR spectrum (400 MHz) of **2c** in DMSO-*d6*.


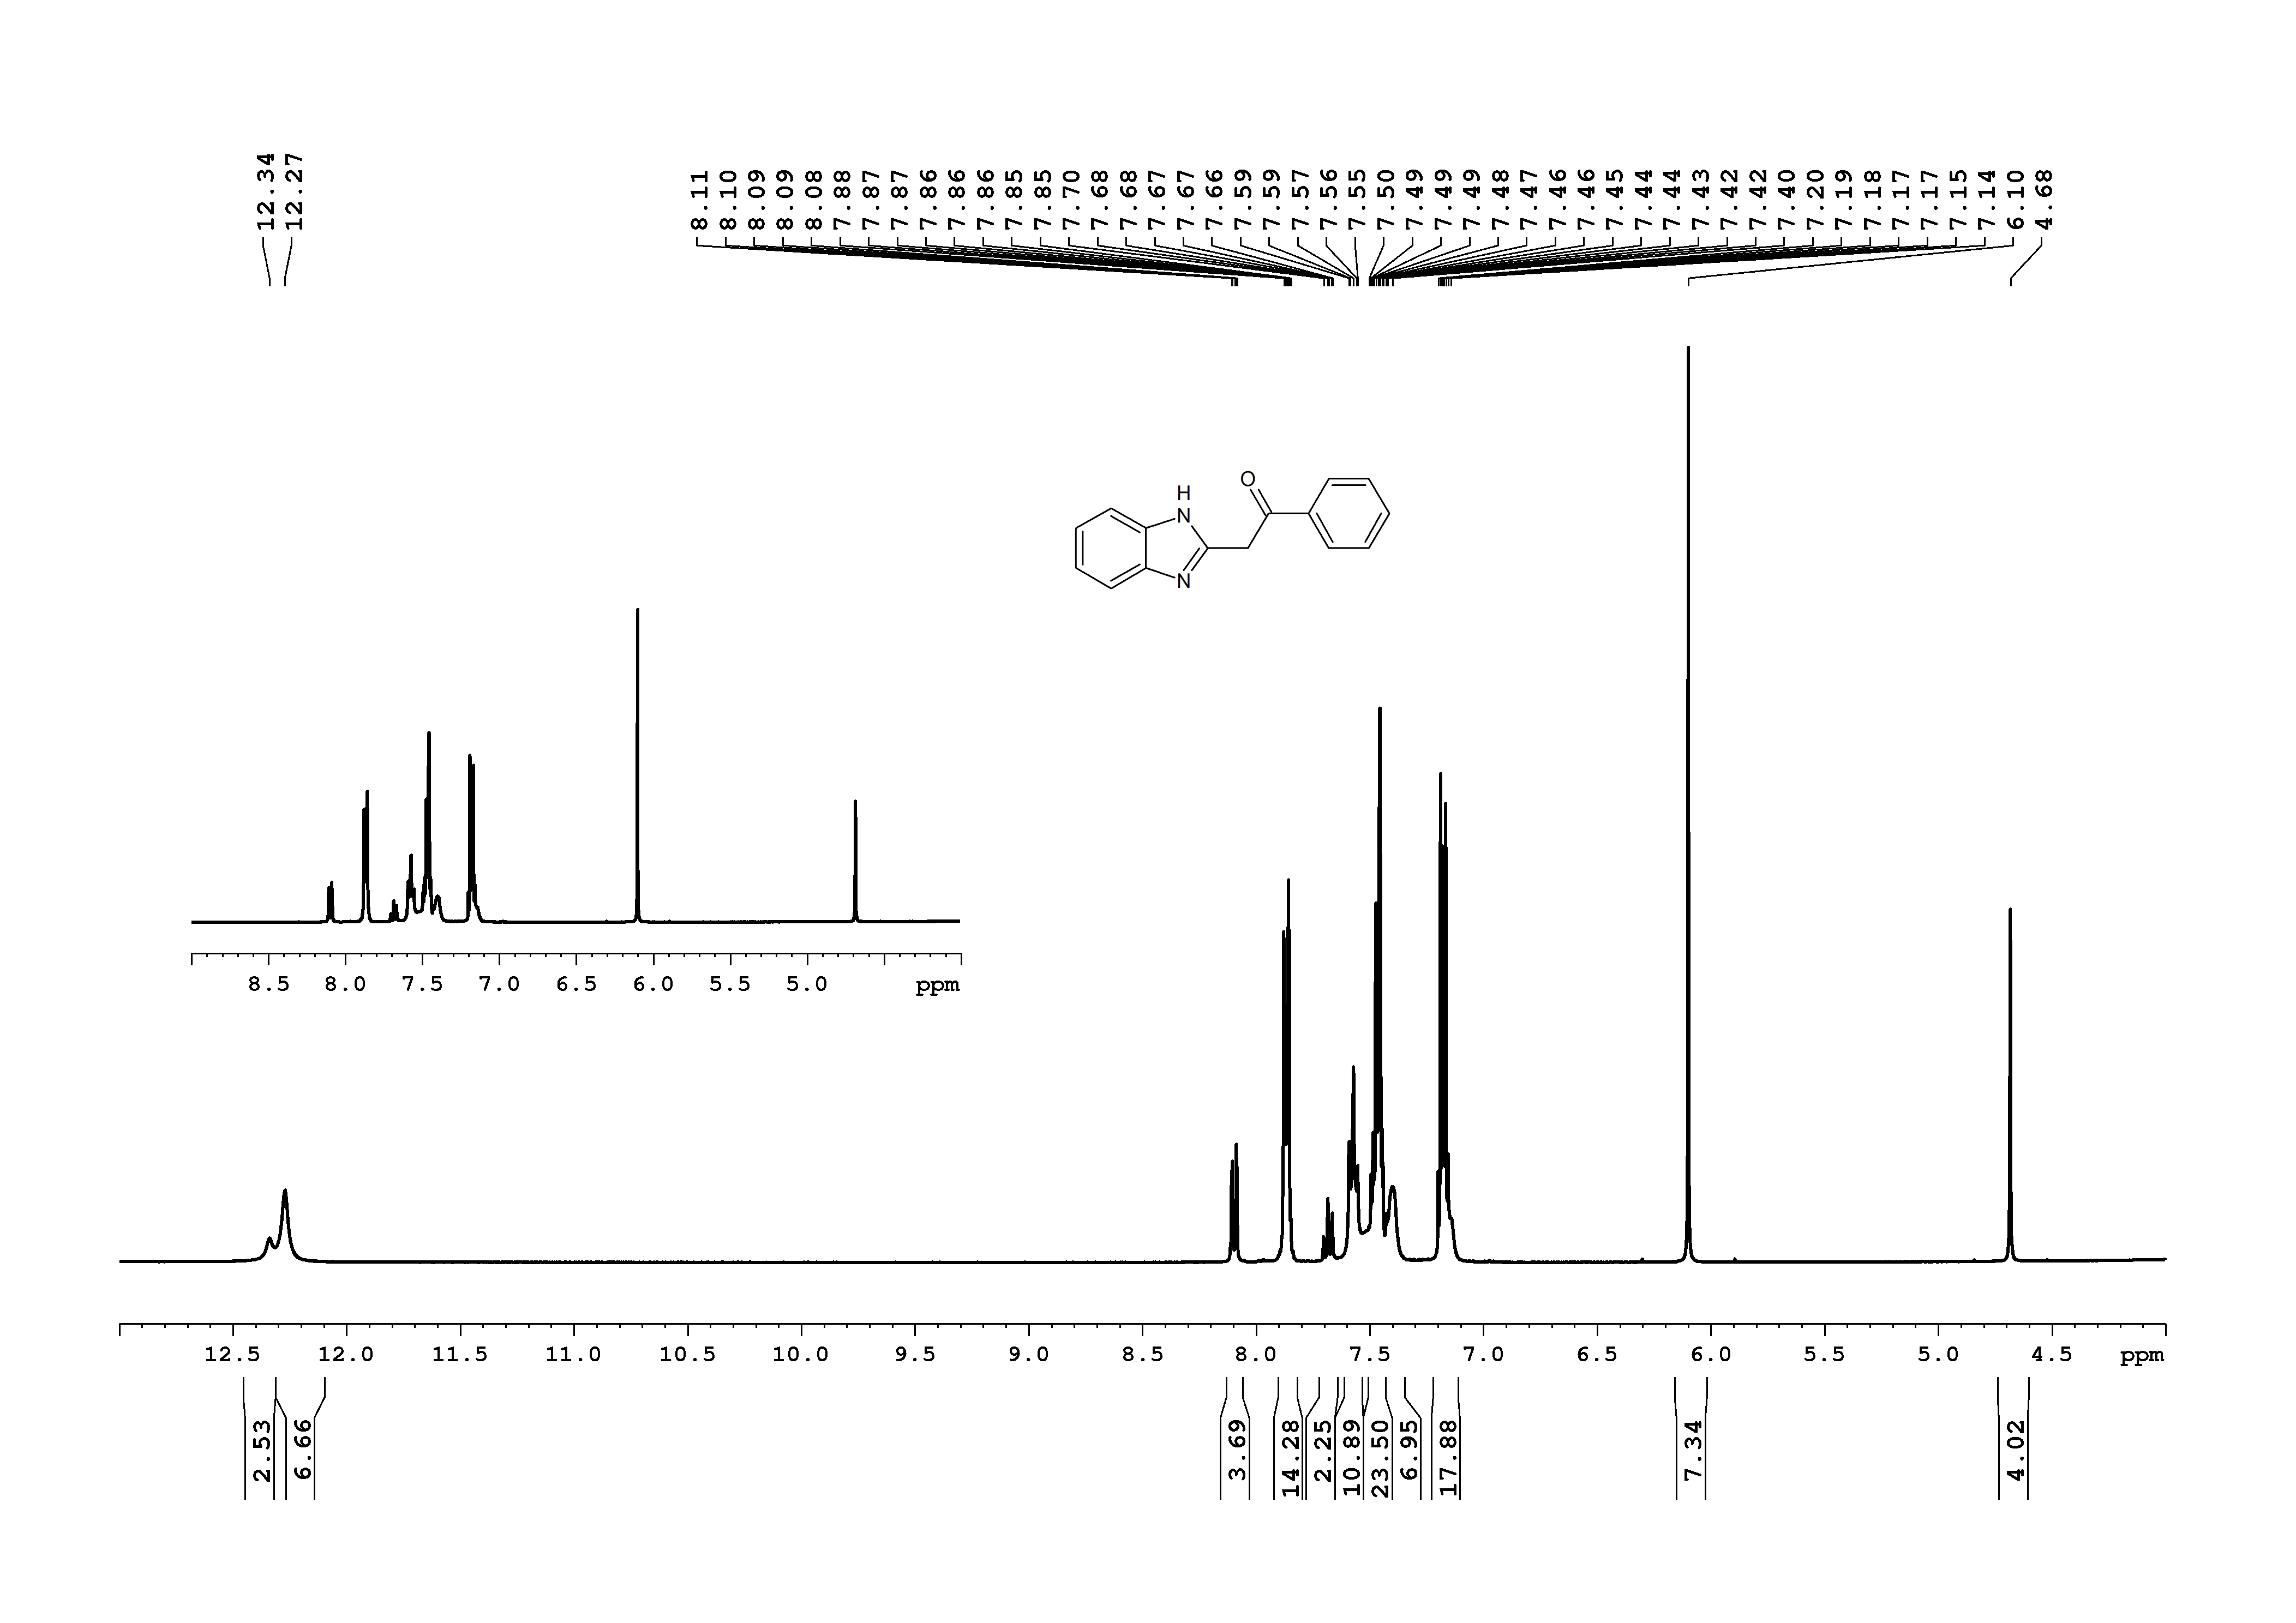


Figure 7. 1H NMR spectrum (400 MHz) of **2d** in DMSO-*d6*.


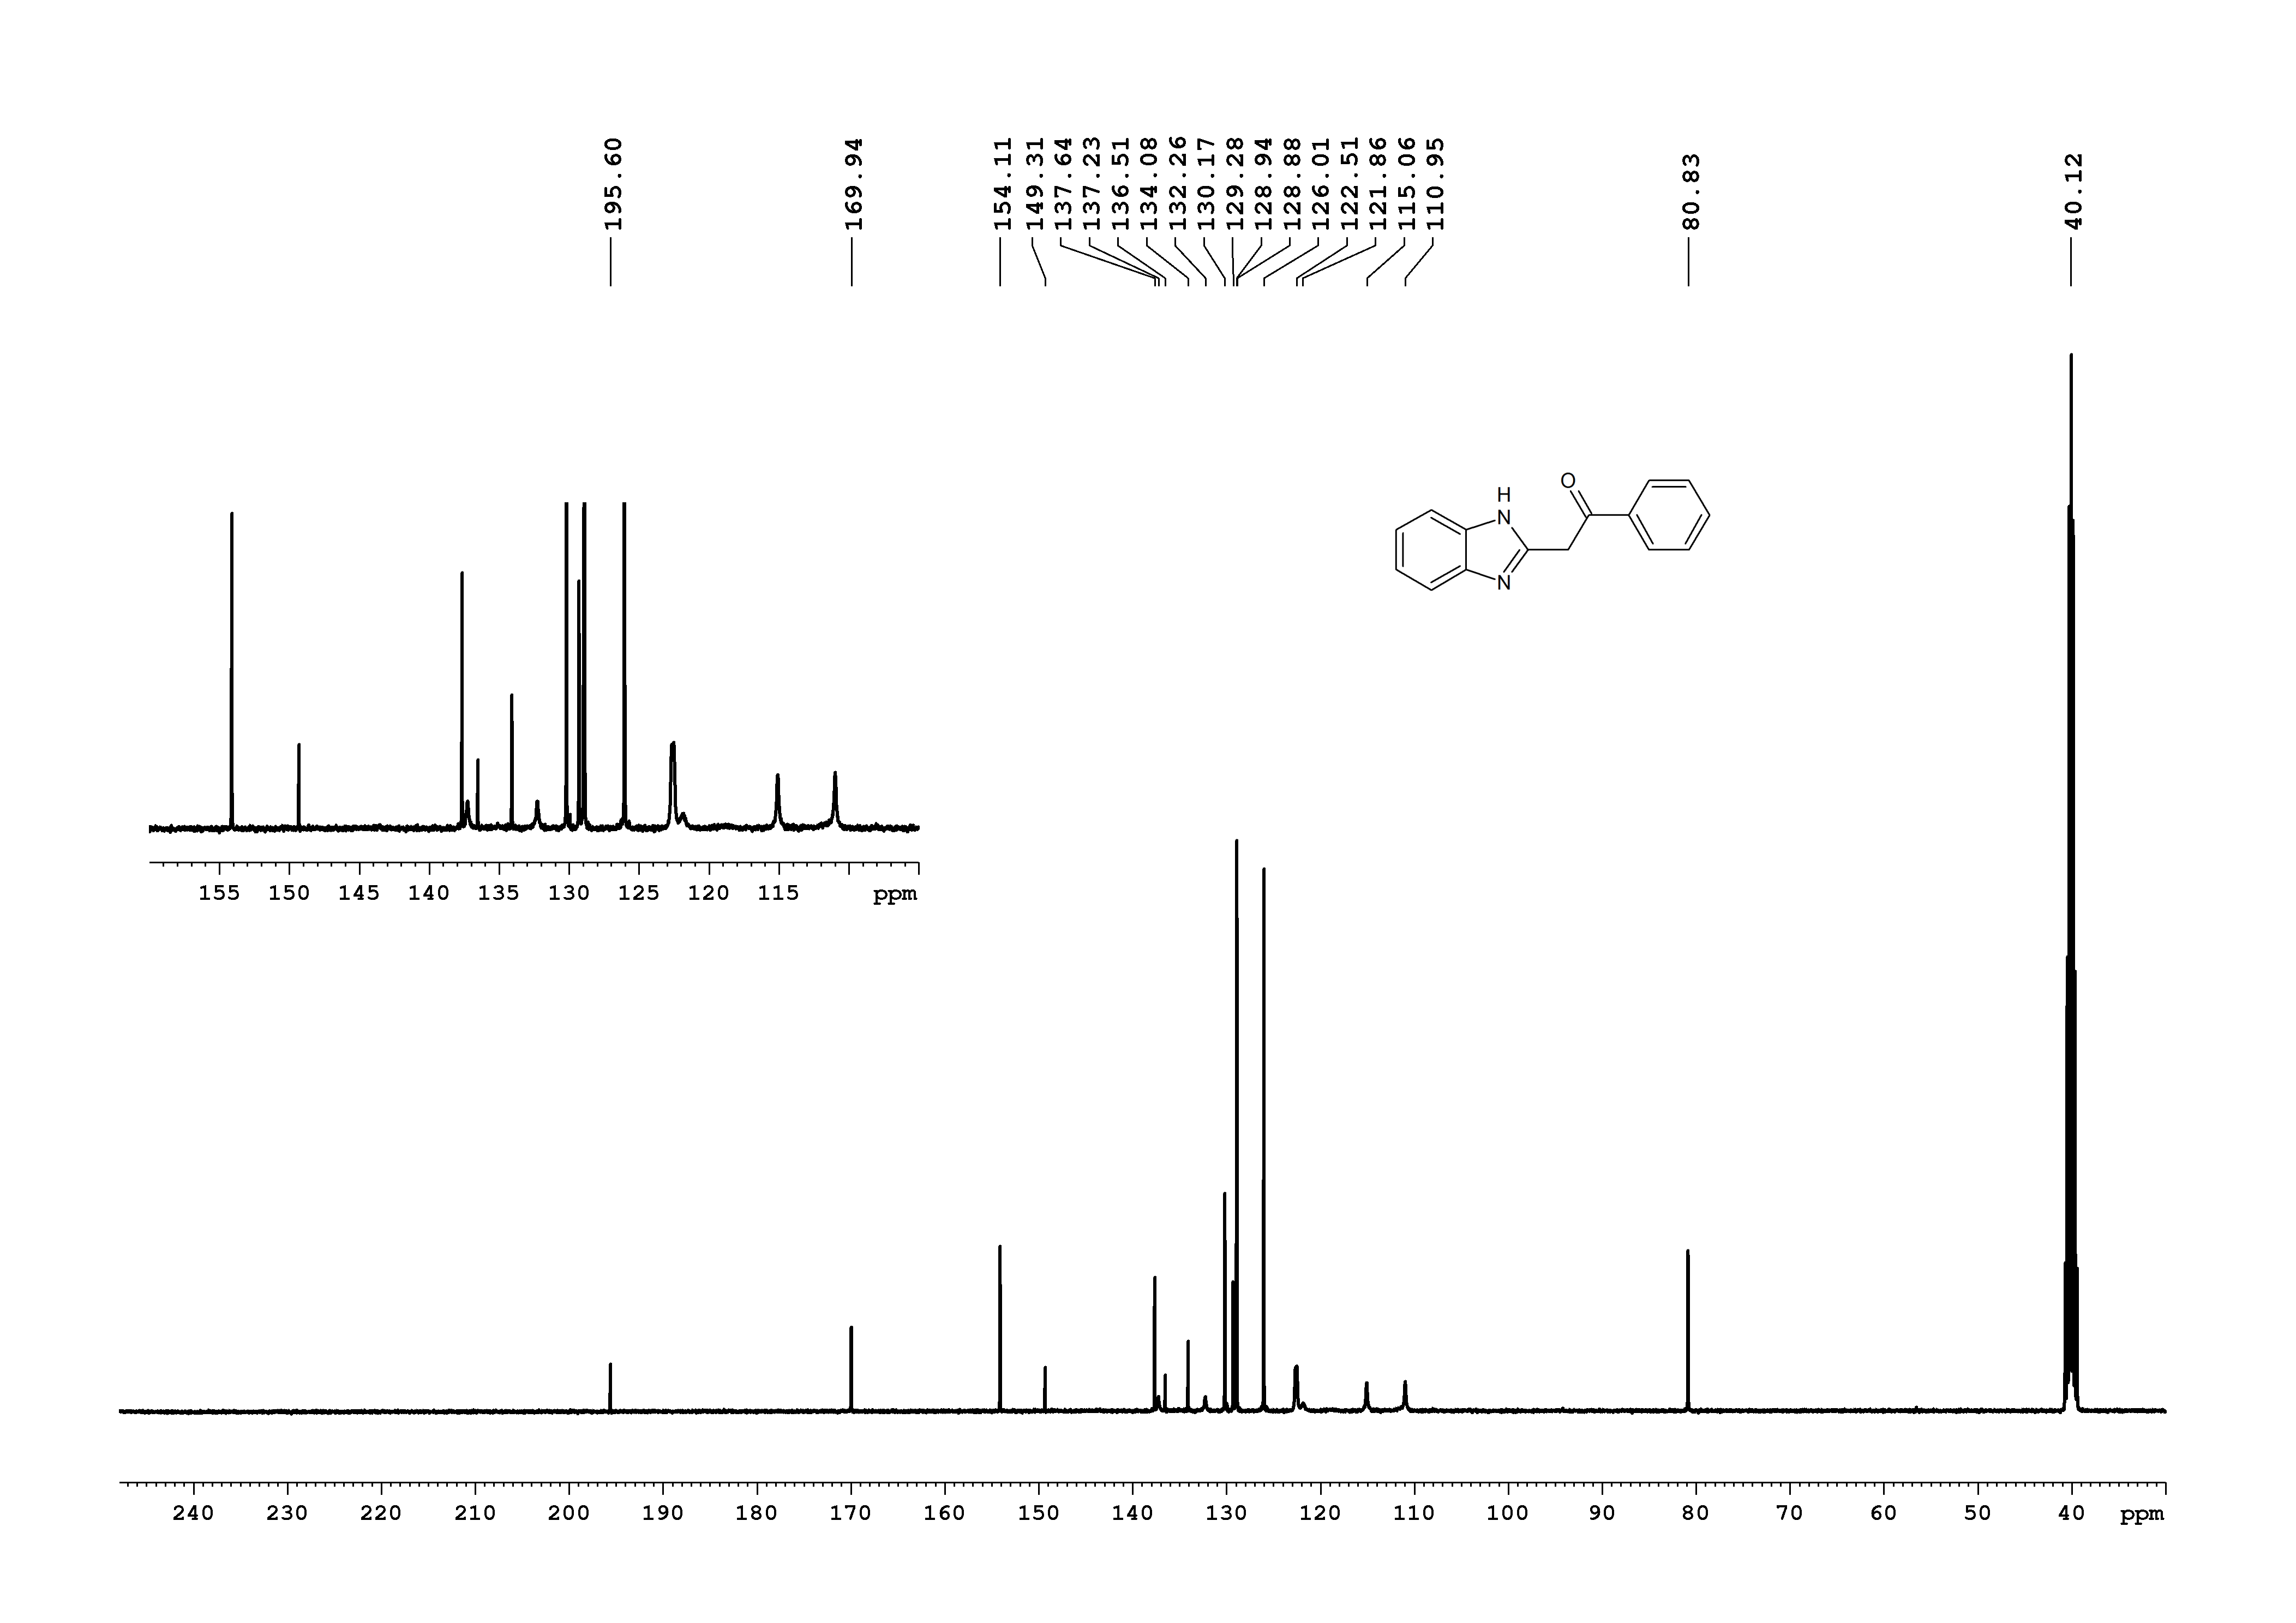


Figure 8. 13C NMR spectrum (400 MHz) of **2d** in DMSO-*d6*.


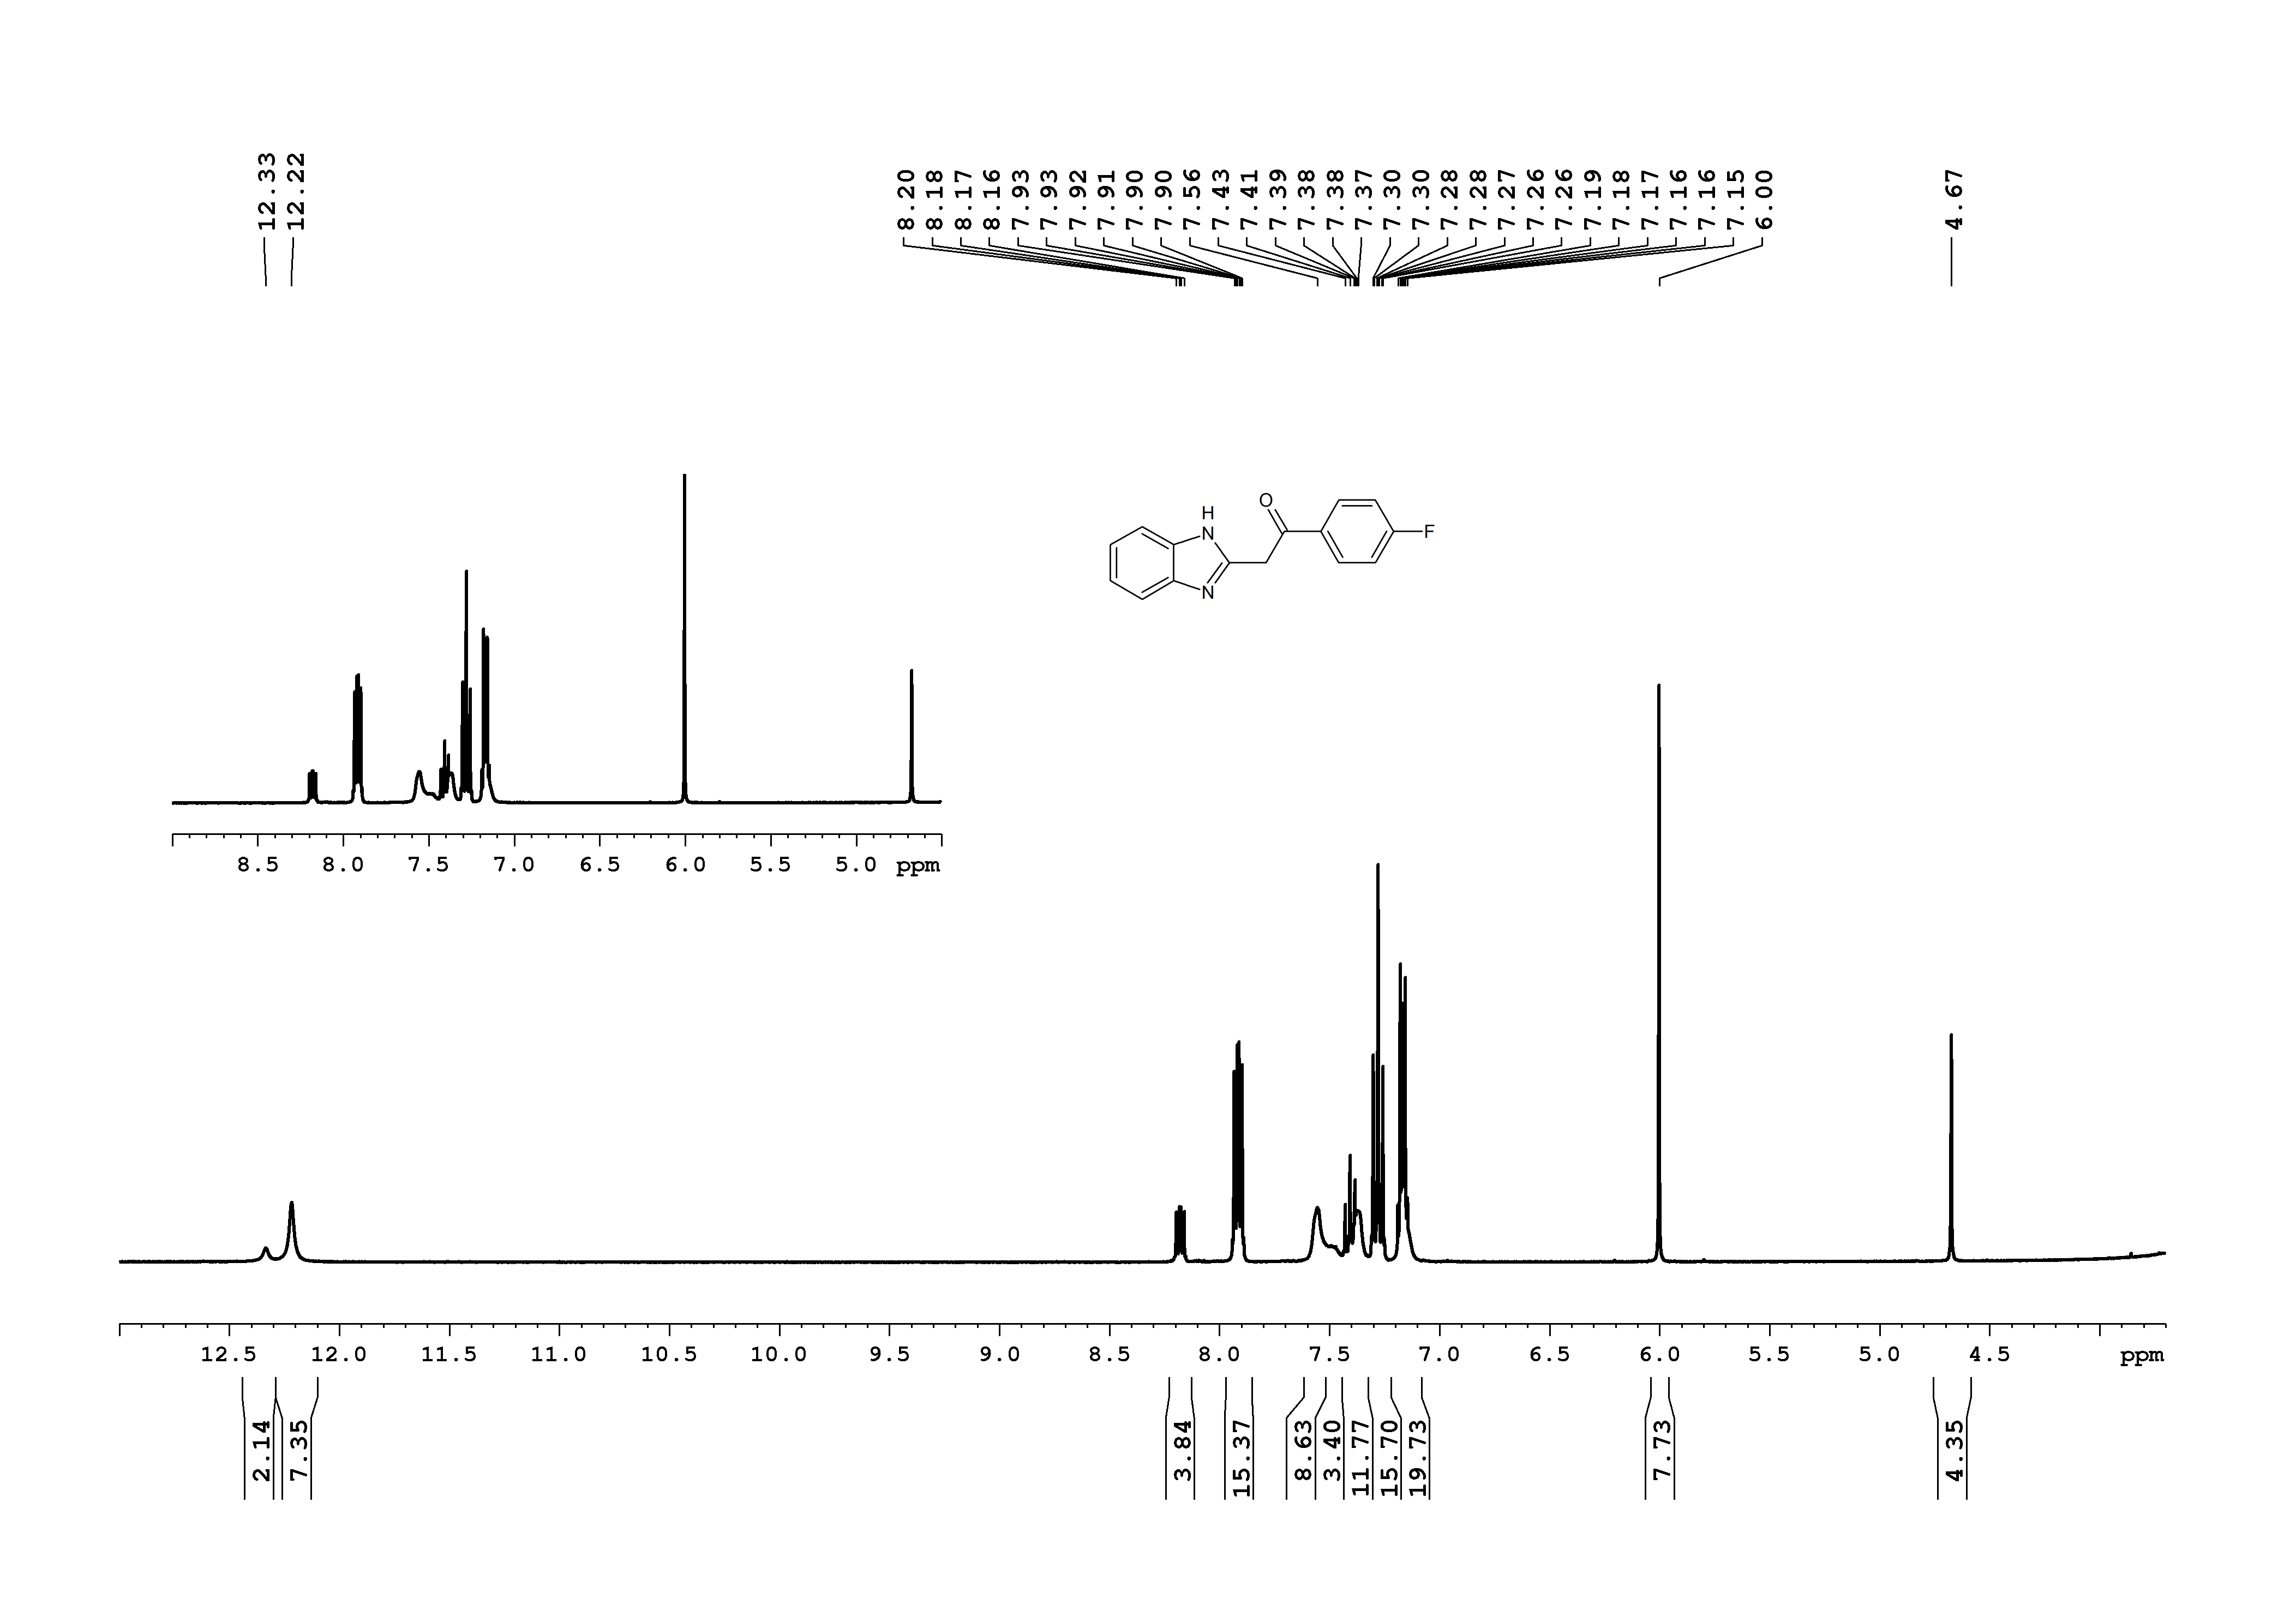


Figure 9. 1H NMR spectrum (400 MHz) of **2e** in DMSO-*d6*.


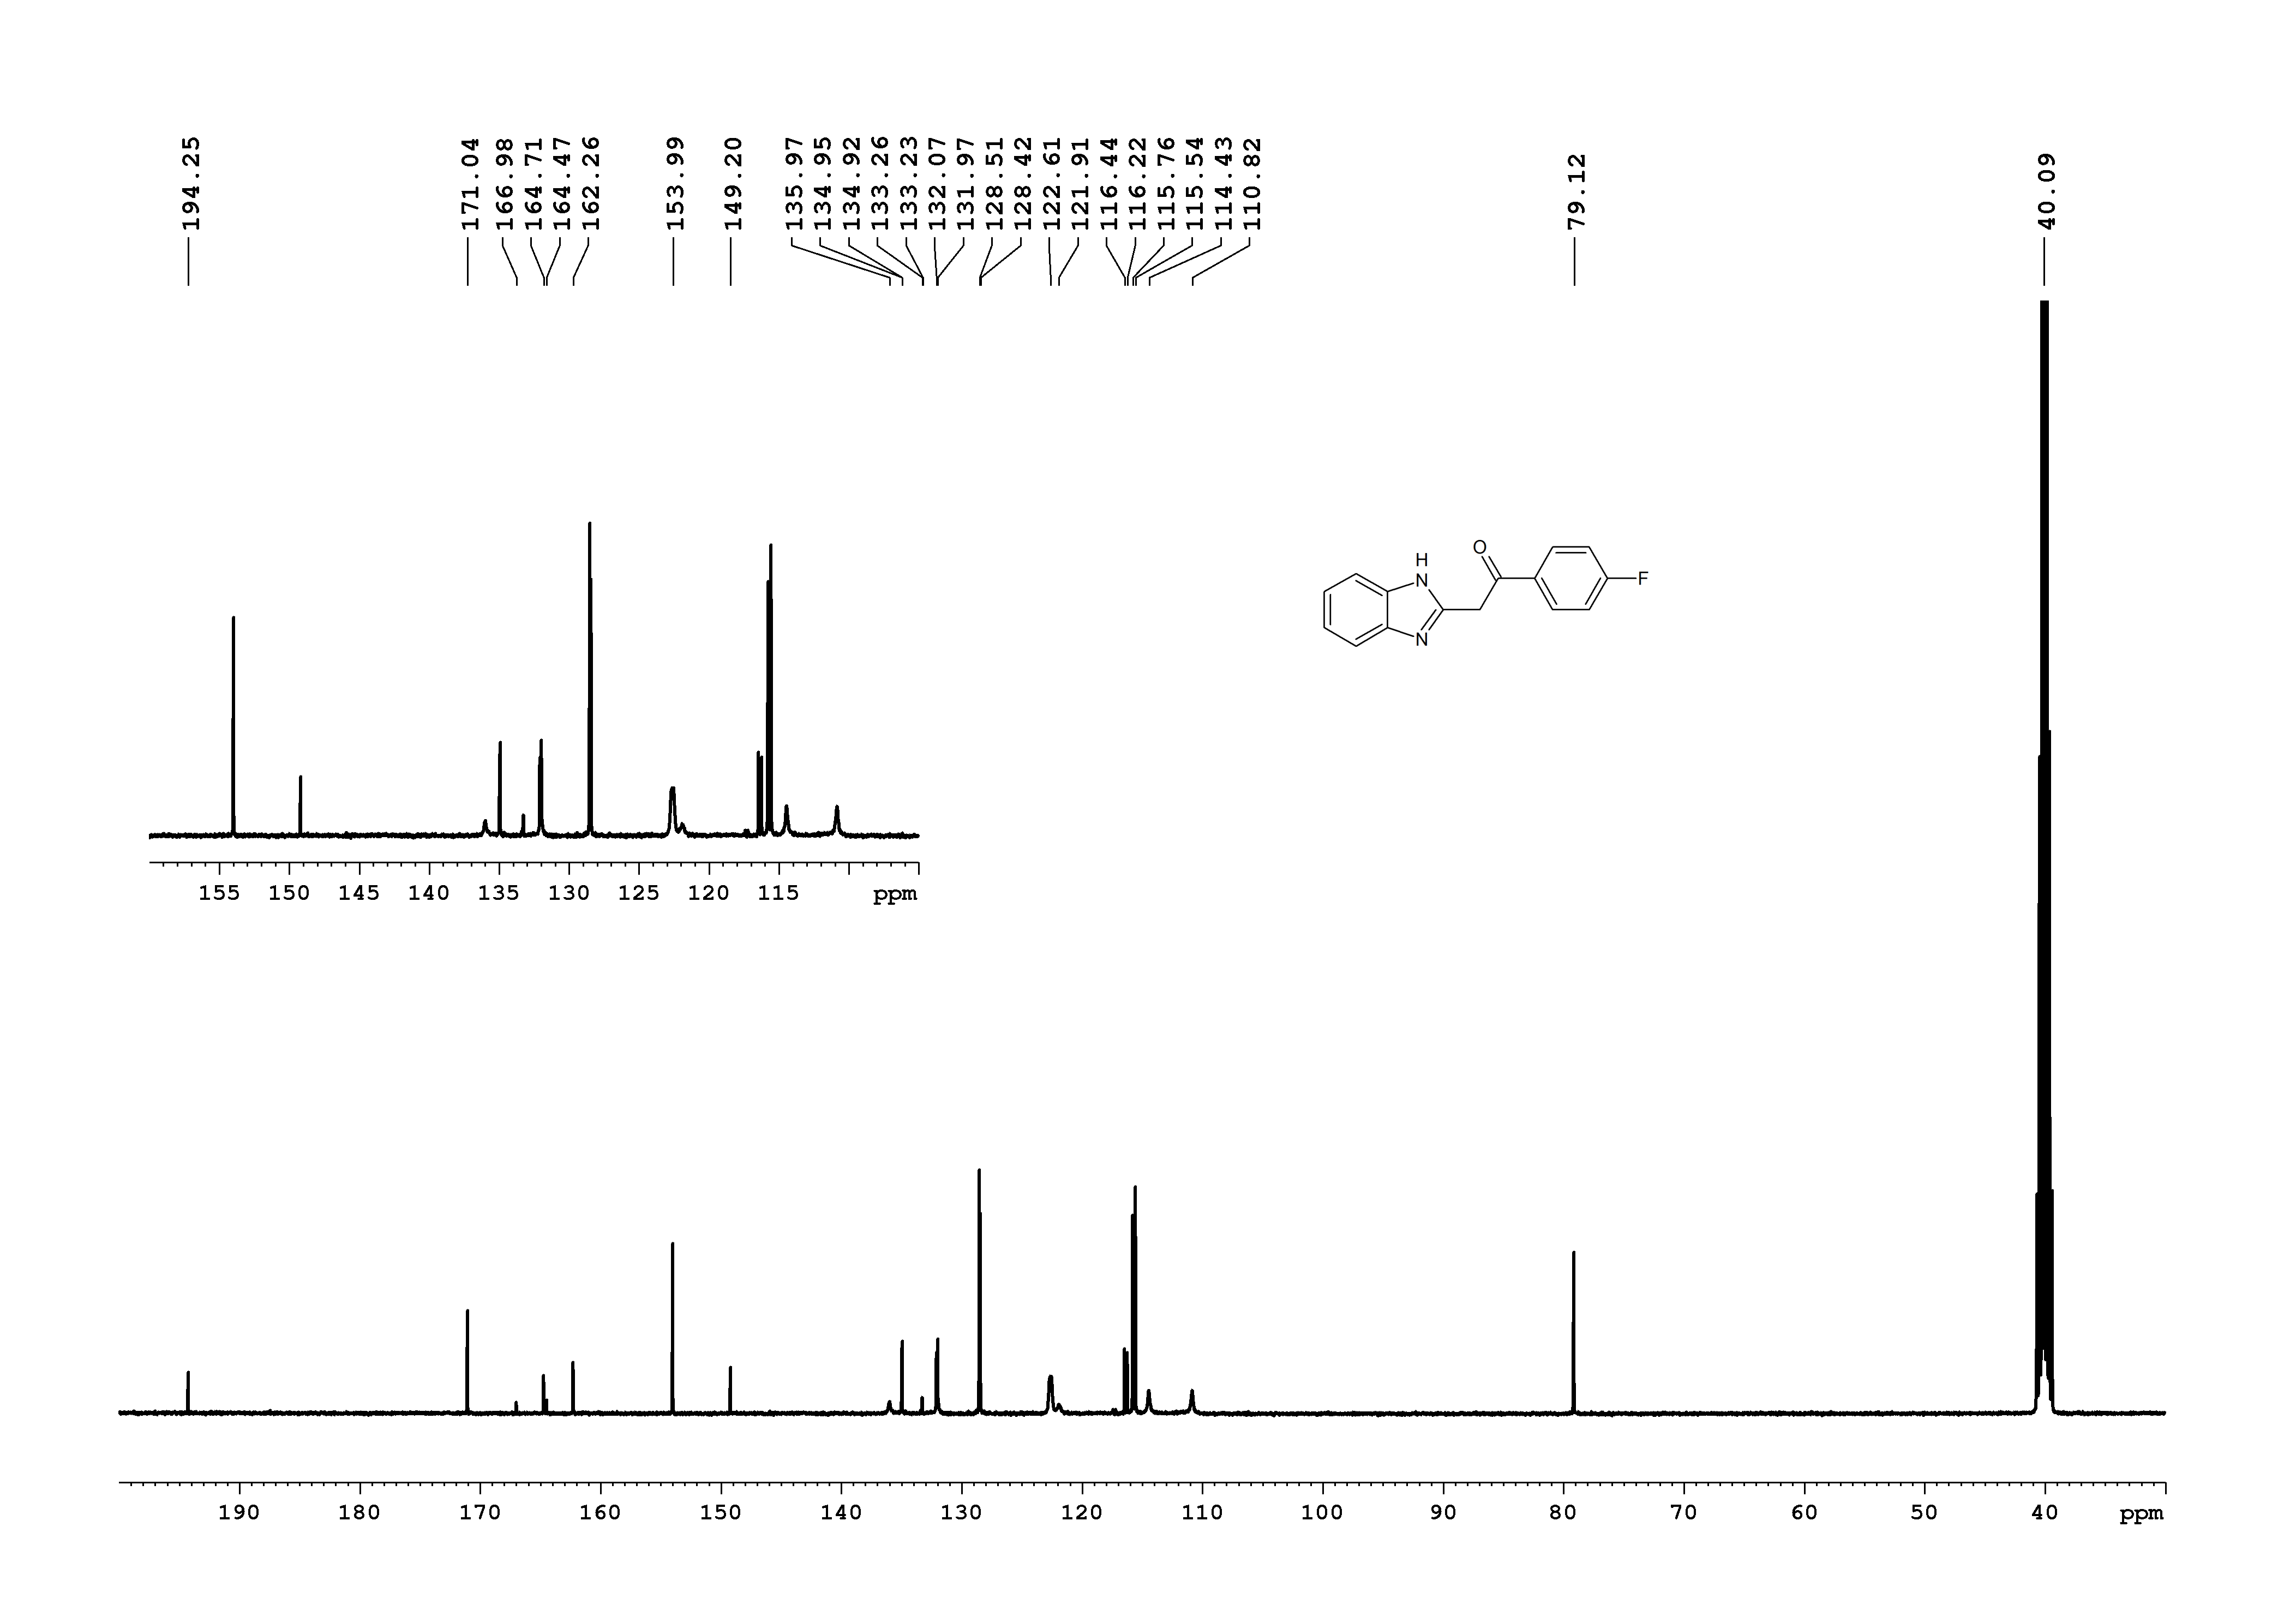


Figure 10. 13C NMR spectrum (400 MHz) of **2e** in DMSO-*d6*.


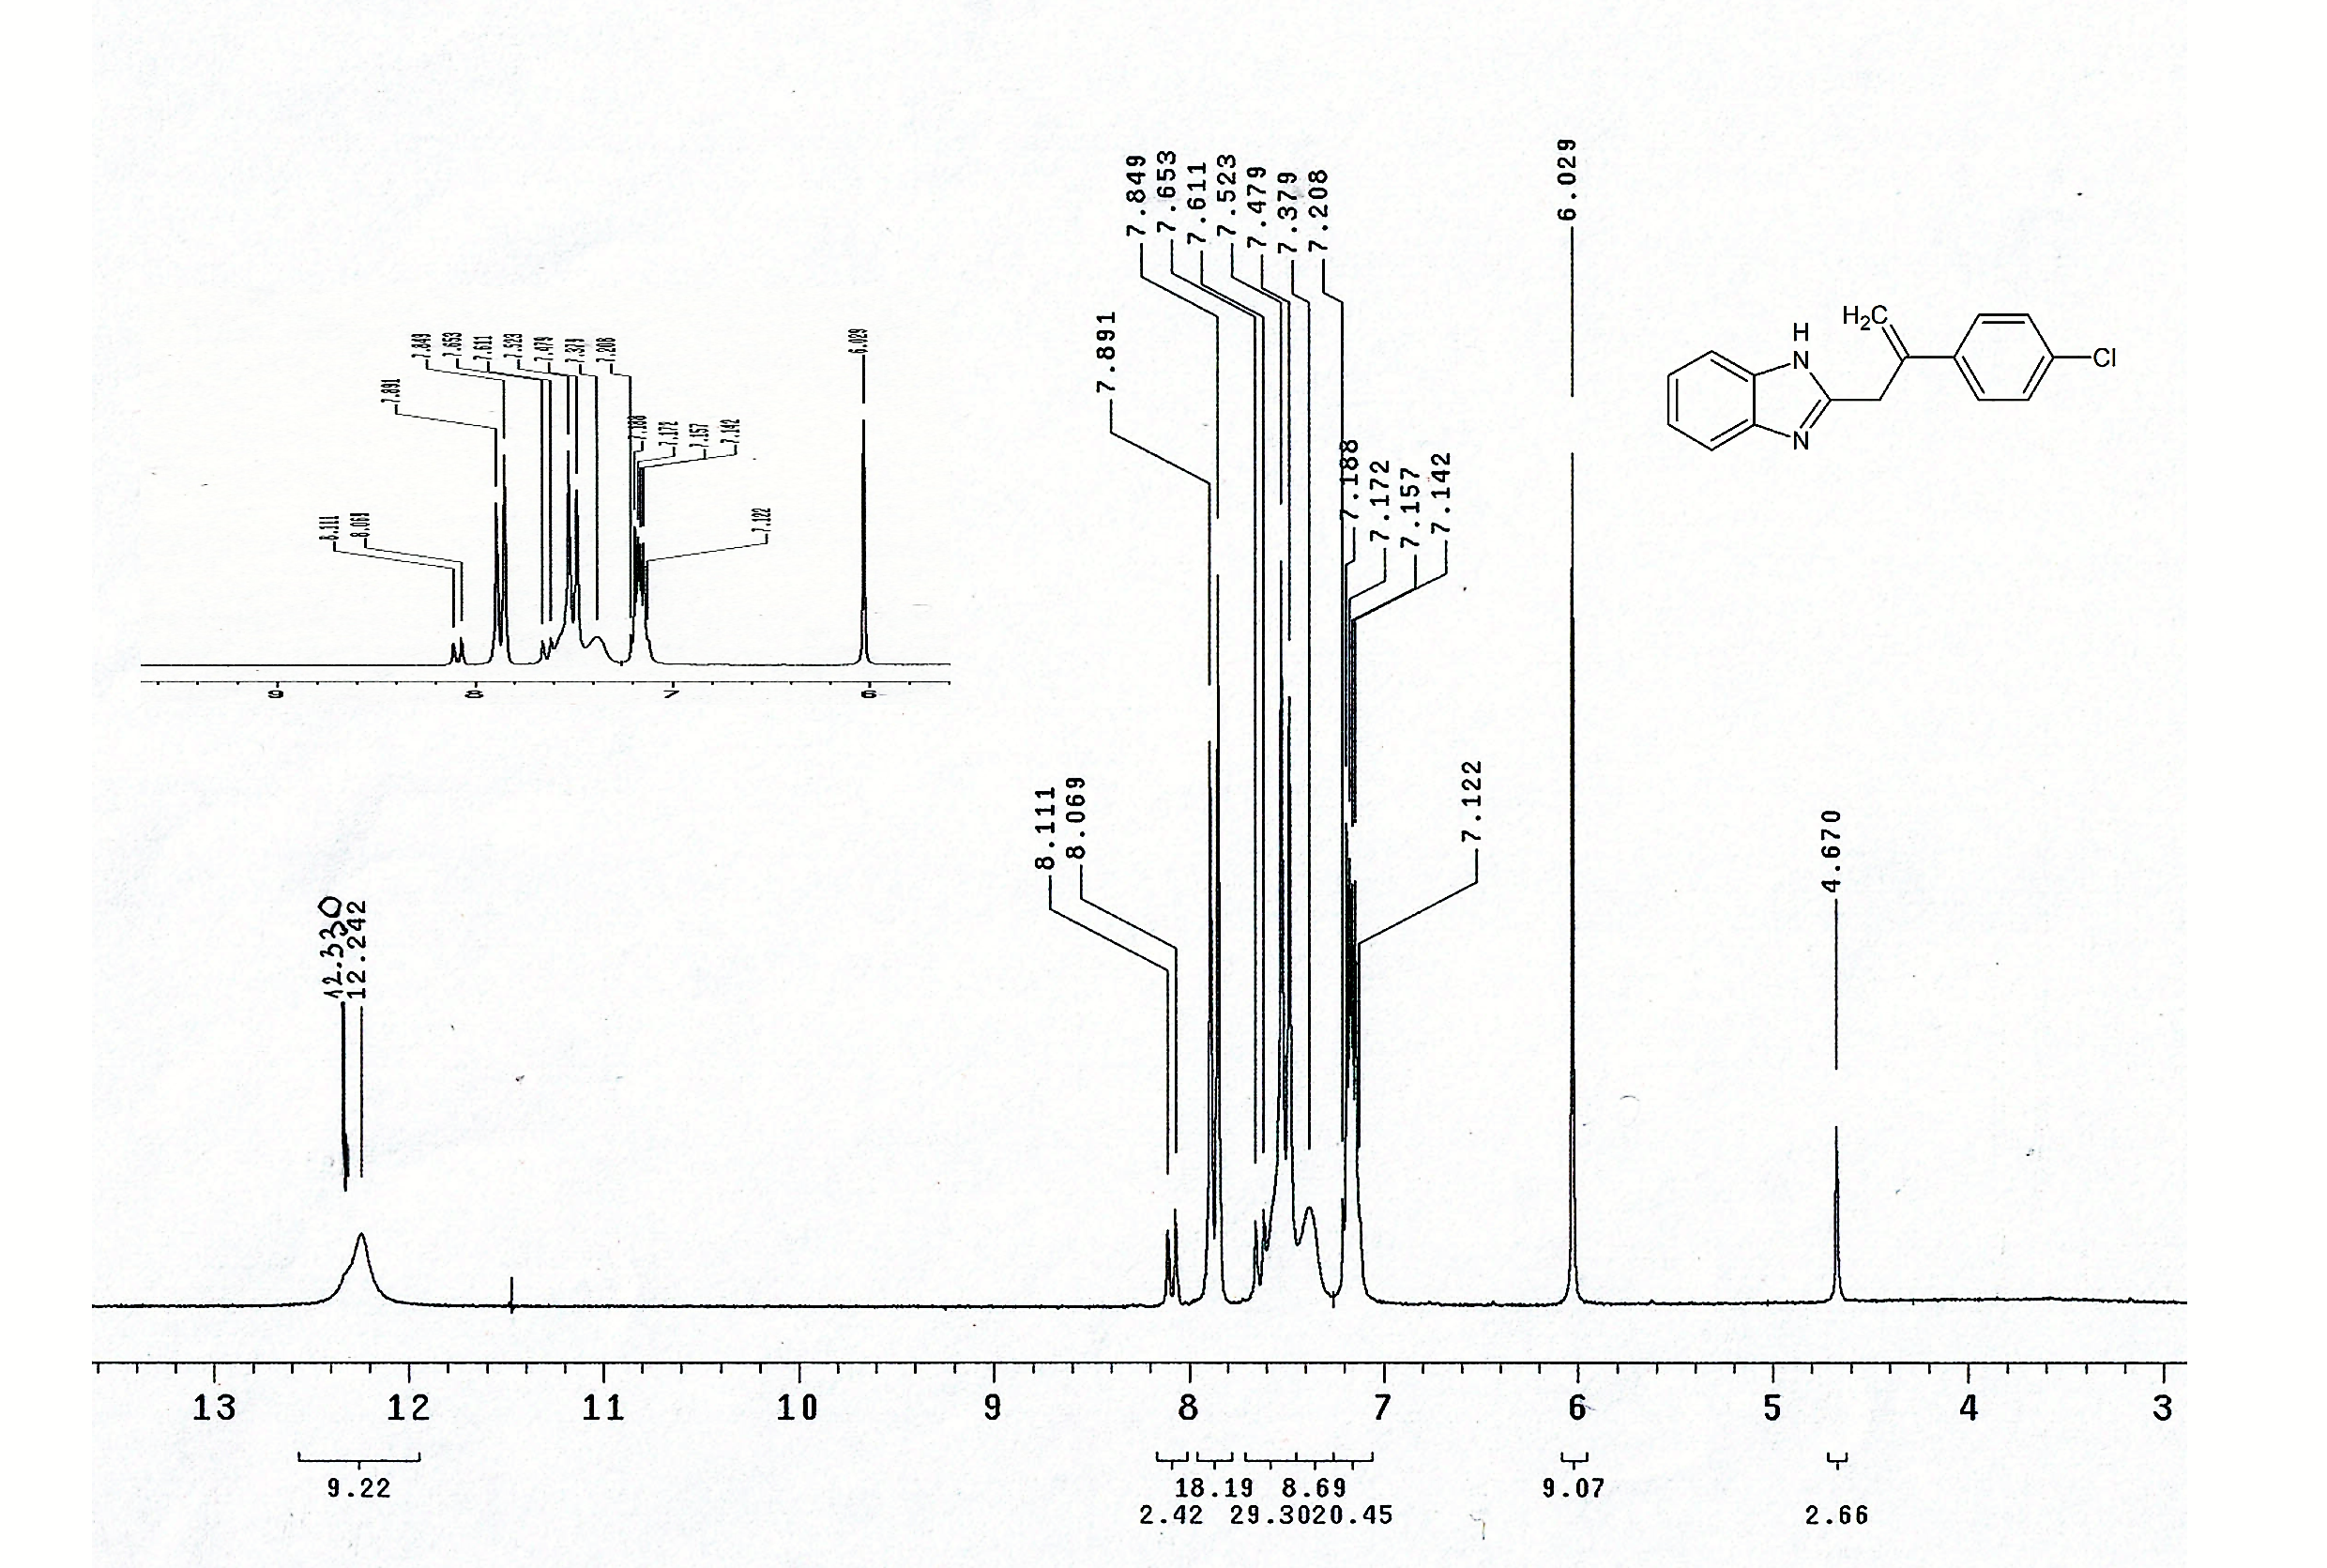


Figure 11. 1H NMR spectrum (400 MHz) of **2f** in DMSO-*d6*.


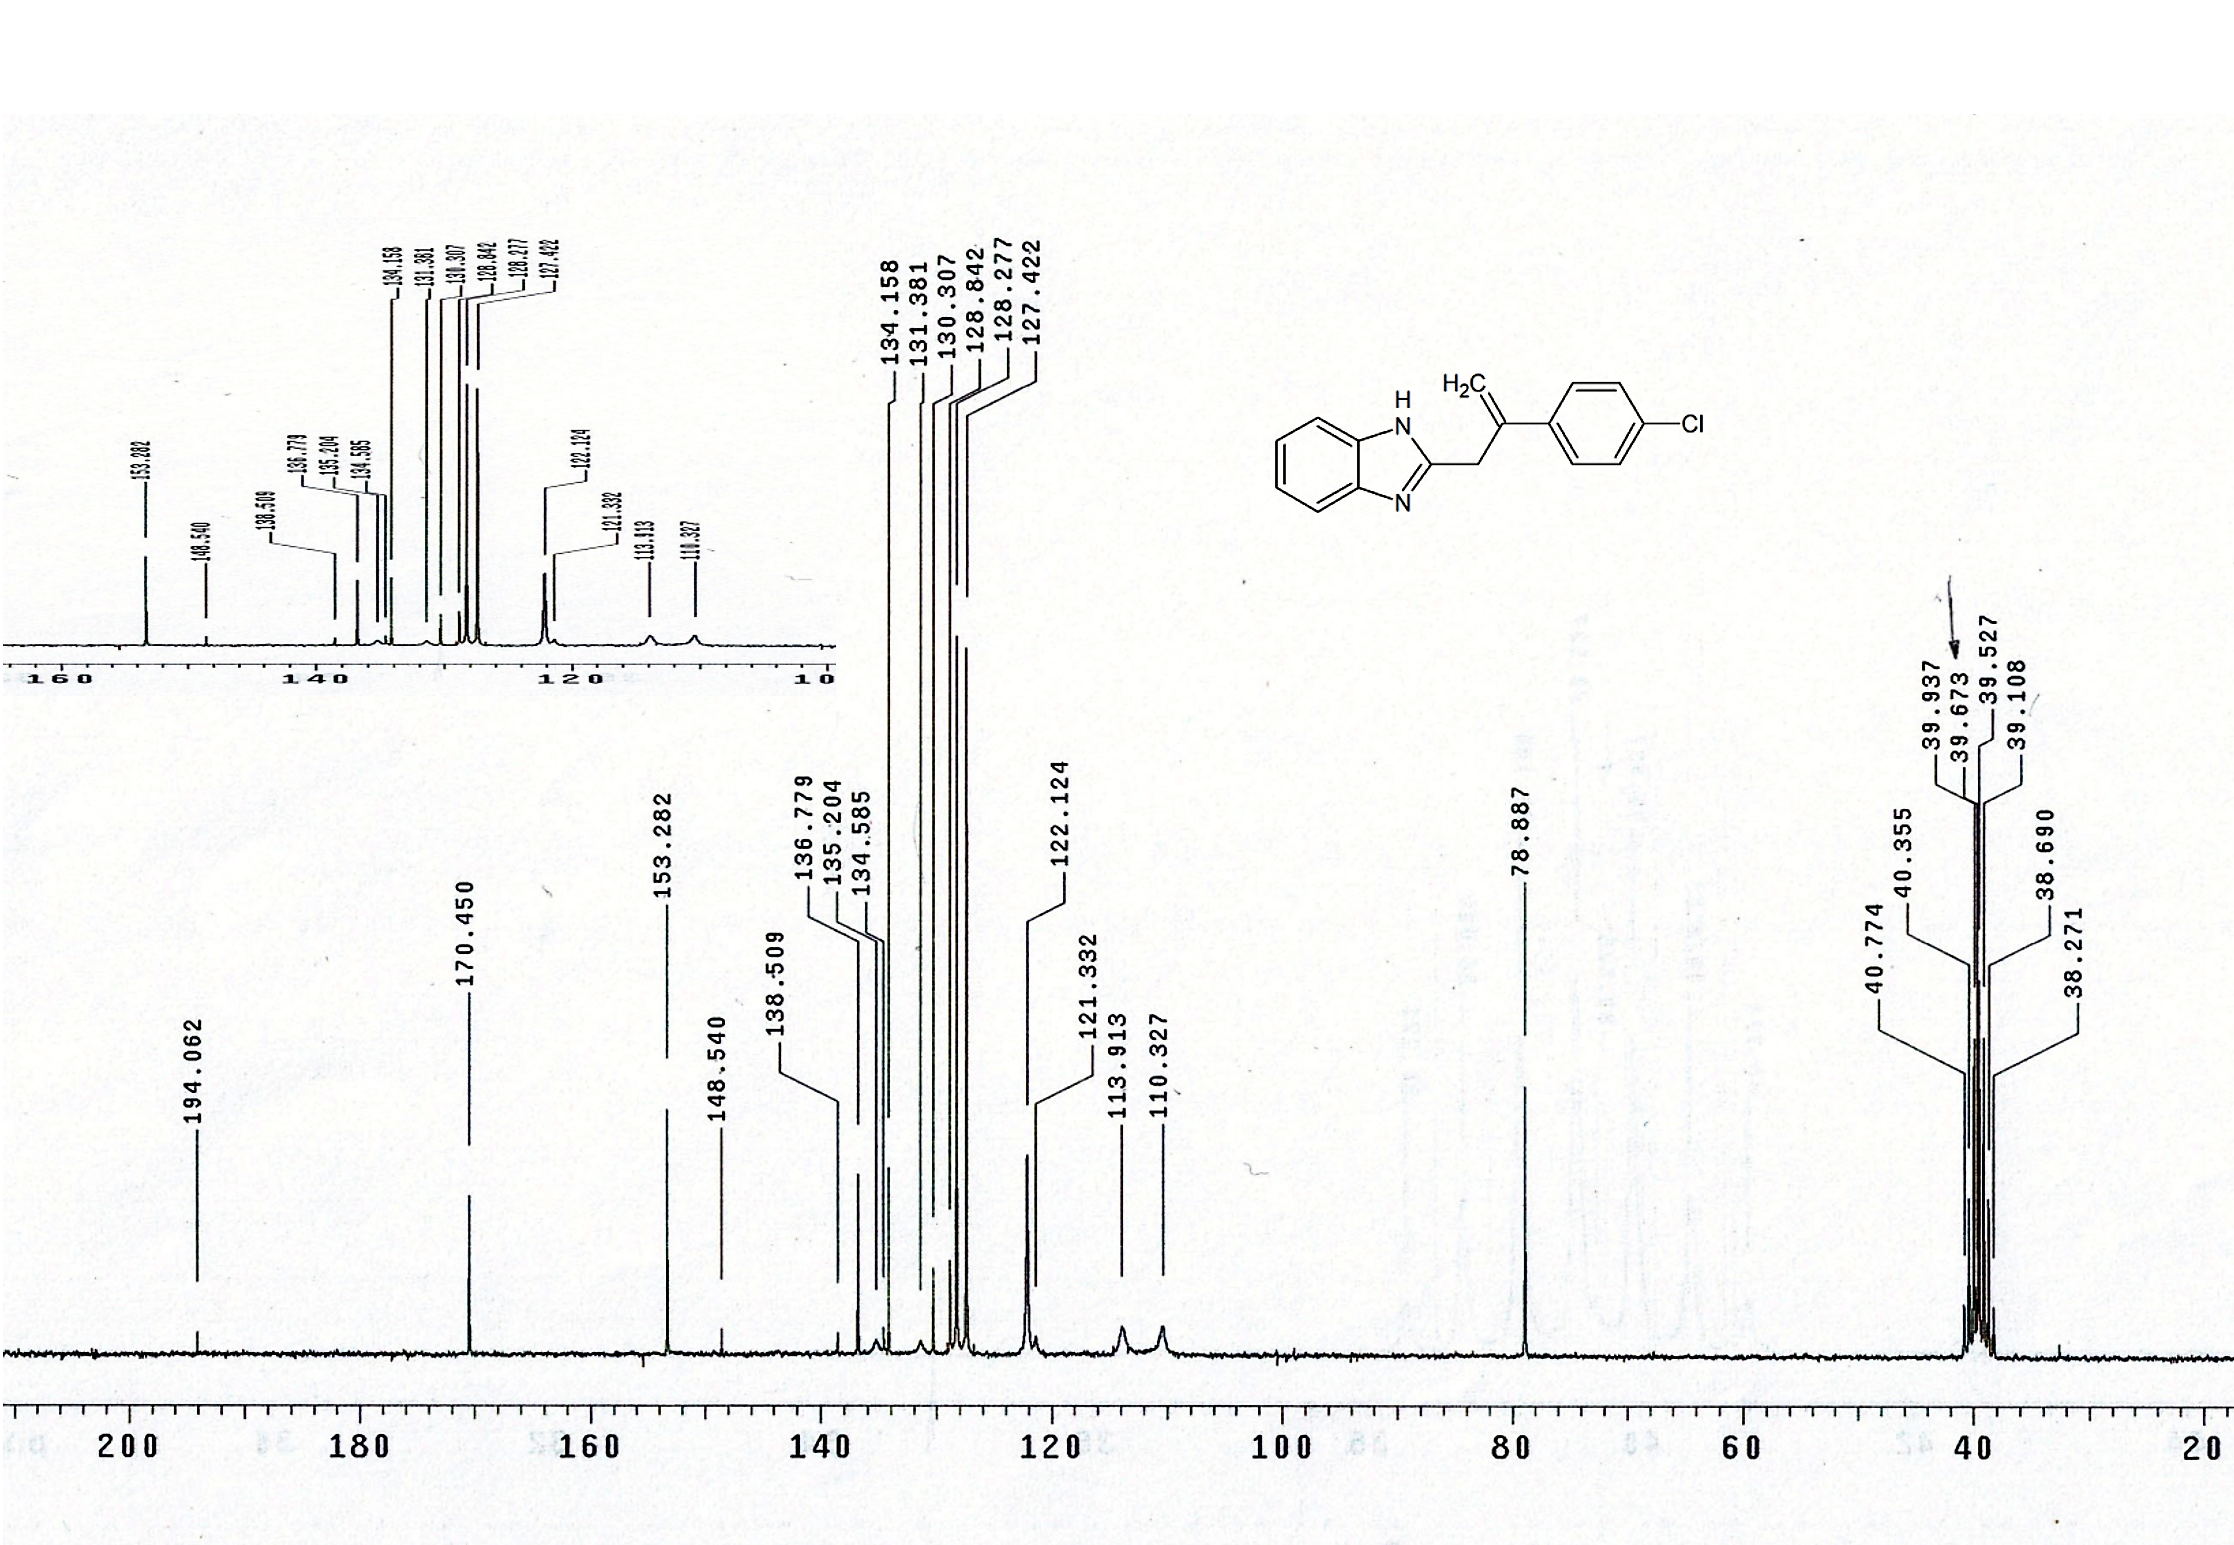


Figure 12. 13C NMR spectrum (400 MHz) of **2f** in DMSO-*d6*.


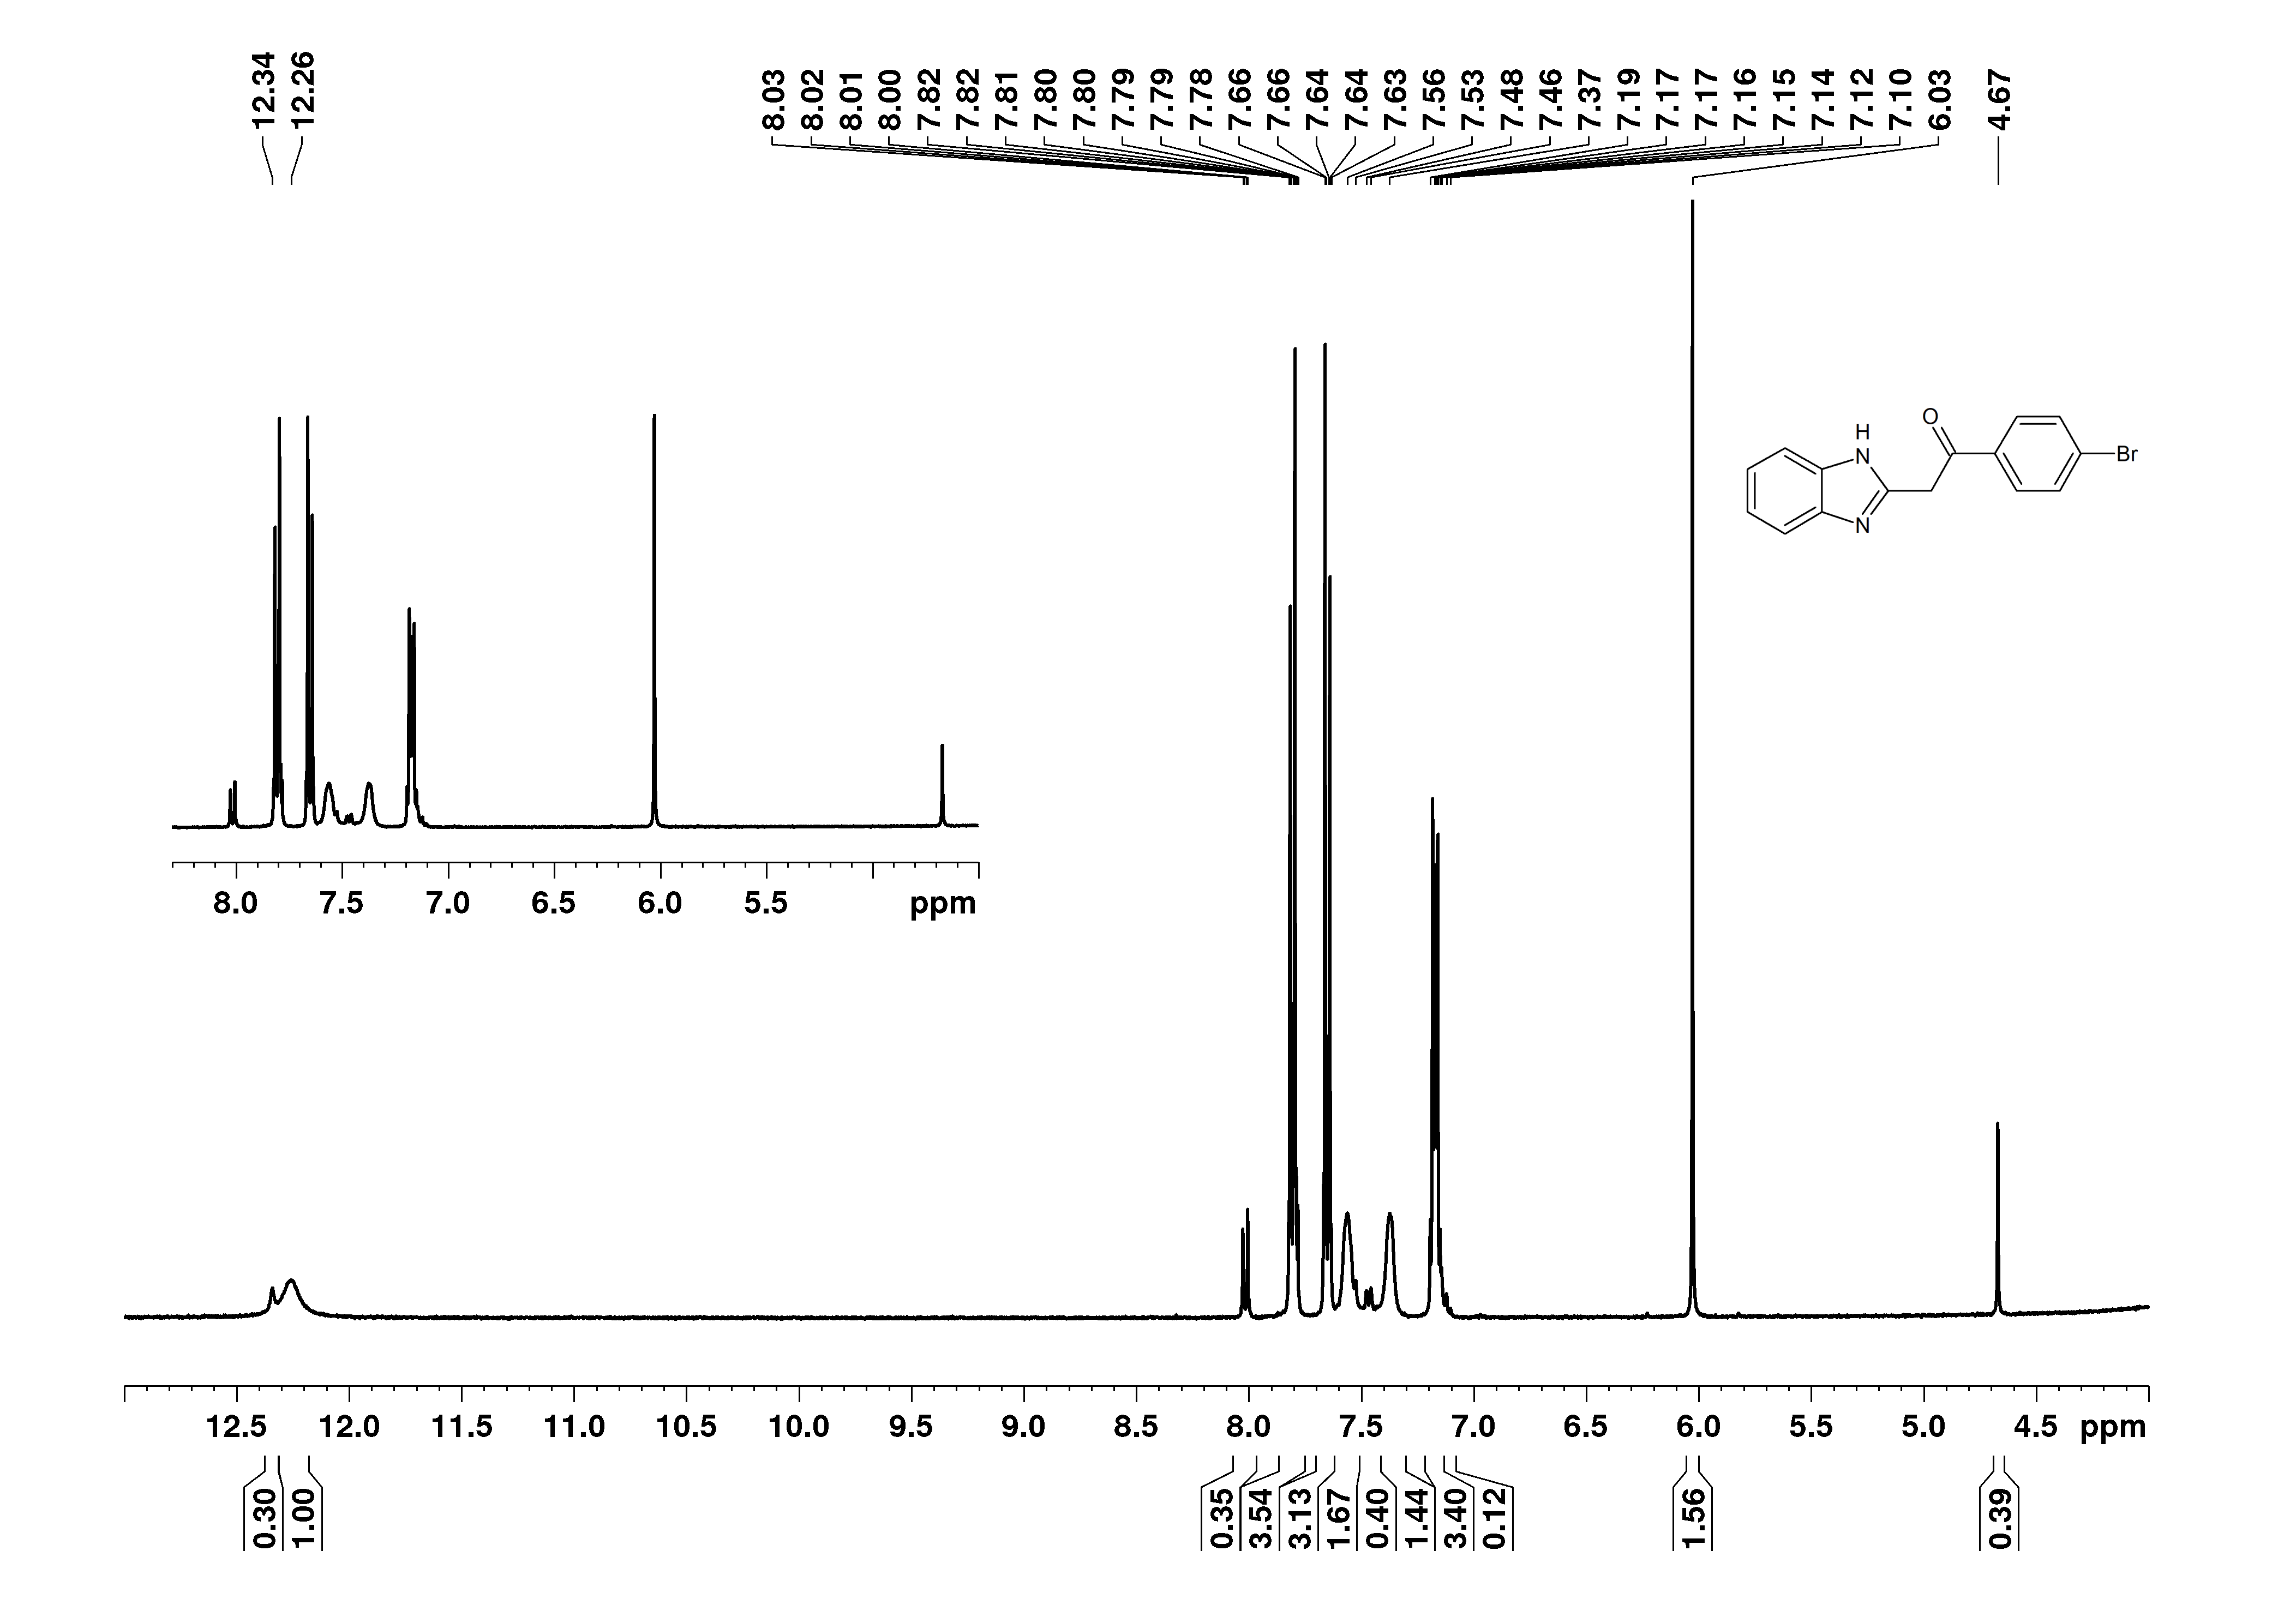


Figure 13. 1H NMR spectrum (400 MHz) of **2g** in DMSO-*d6*.


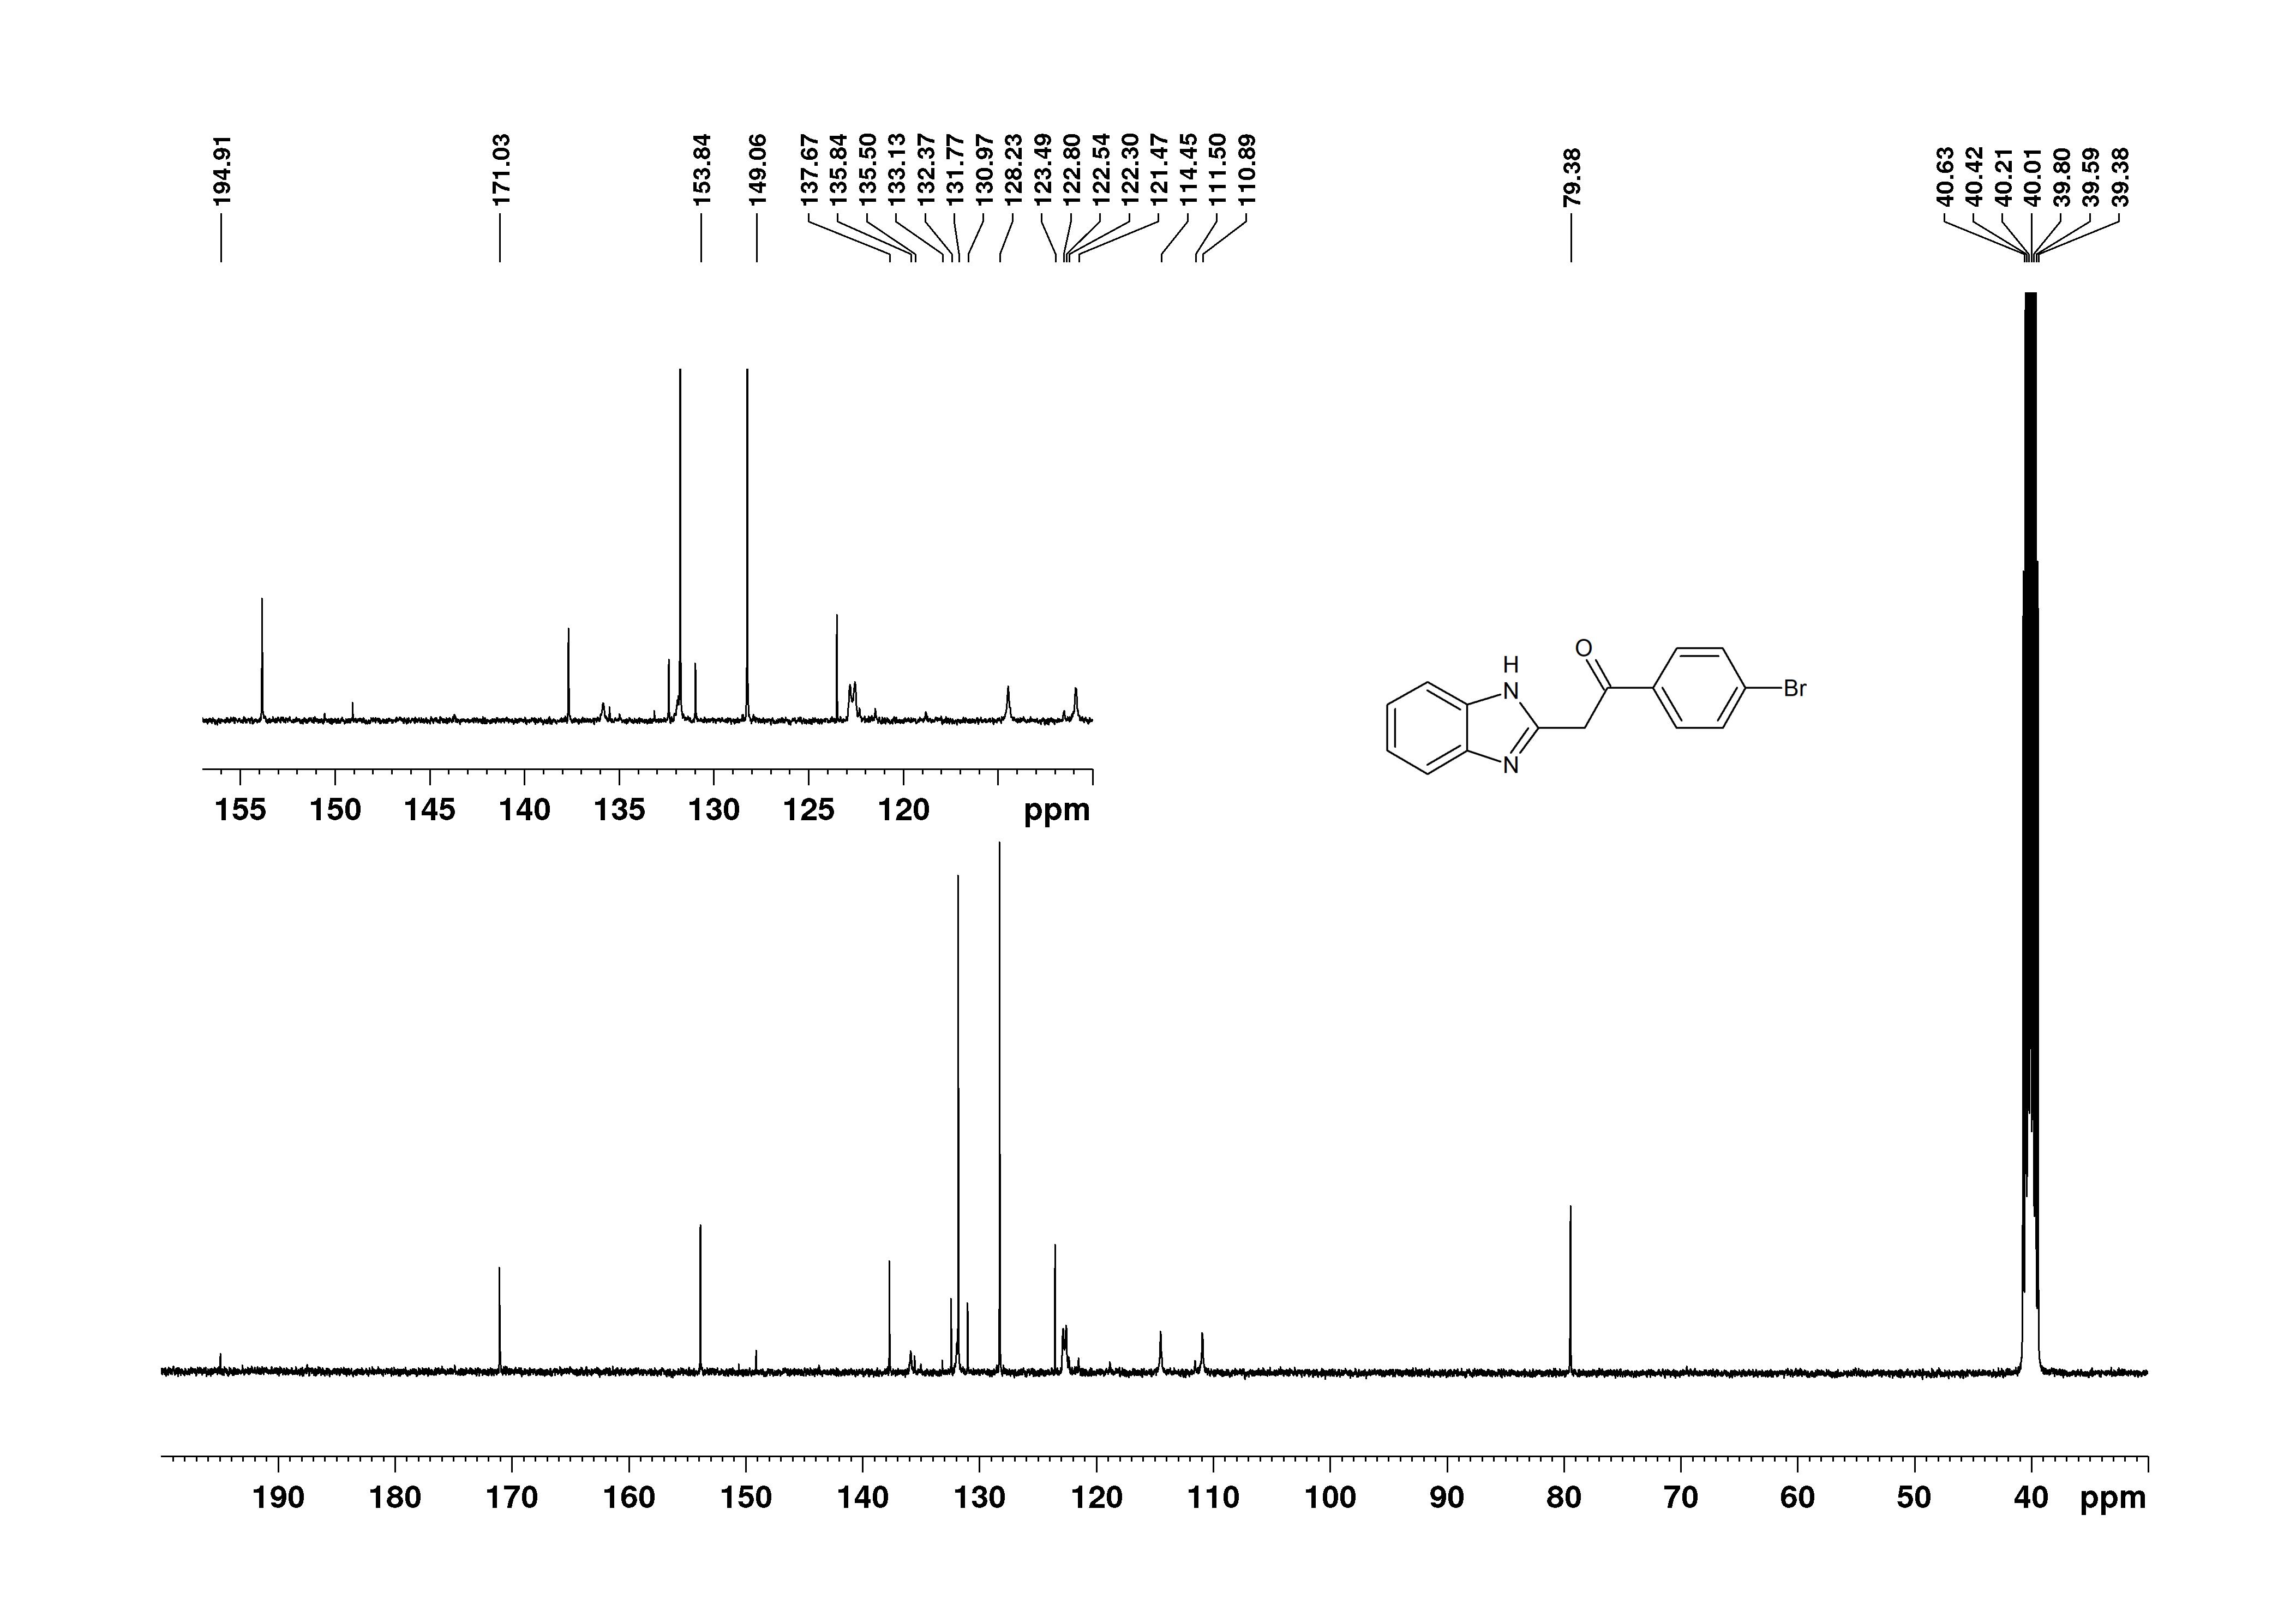


Figure 14. 13C NMR spectrum (400 MHz) of **2g** in DMSO-*d6*.


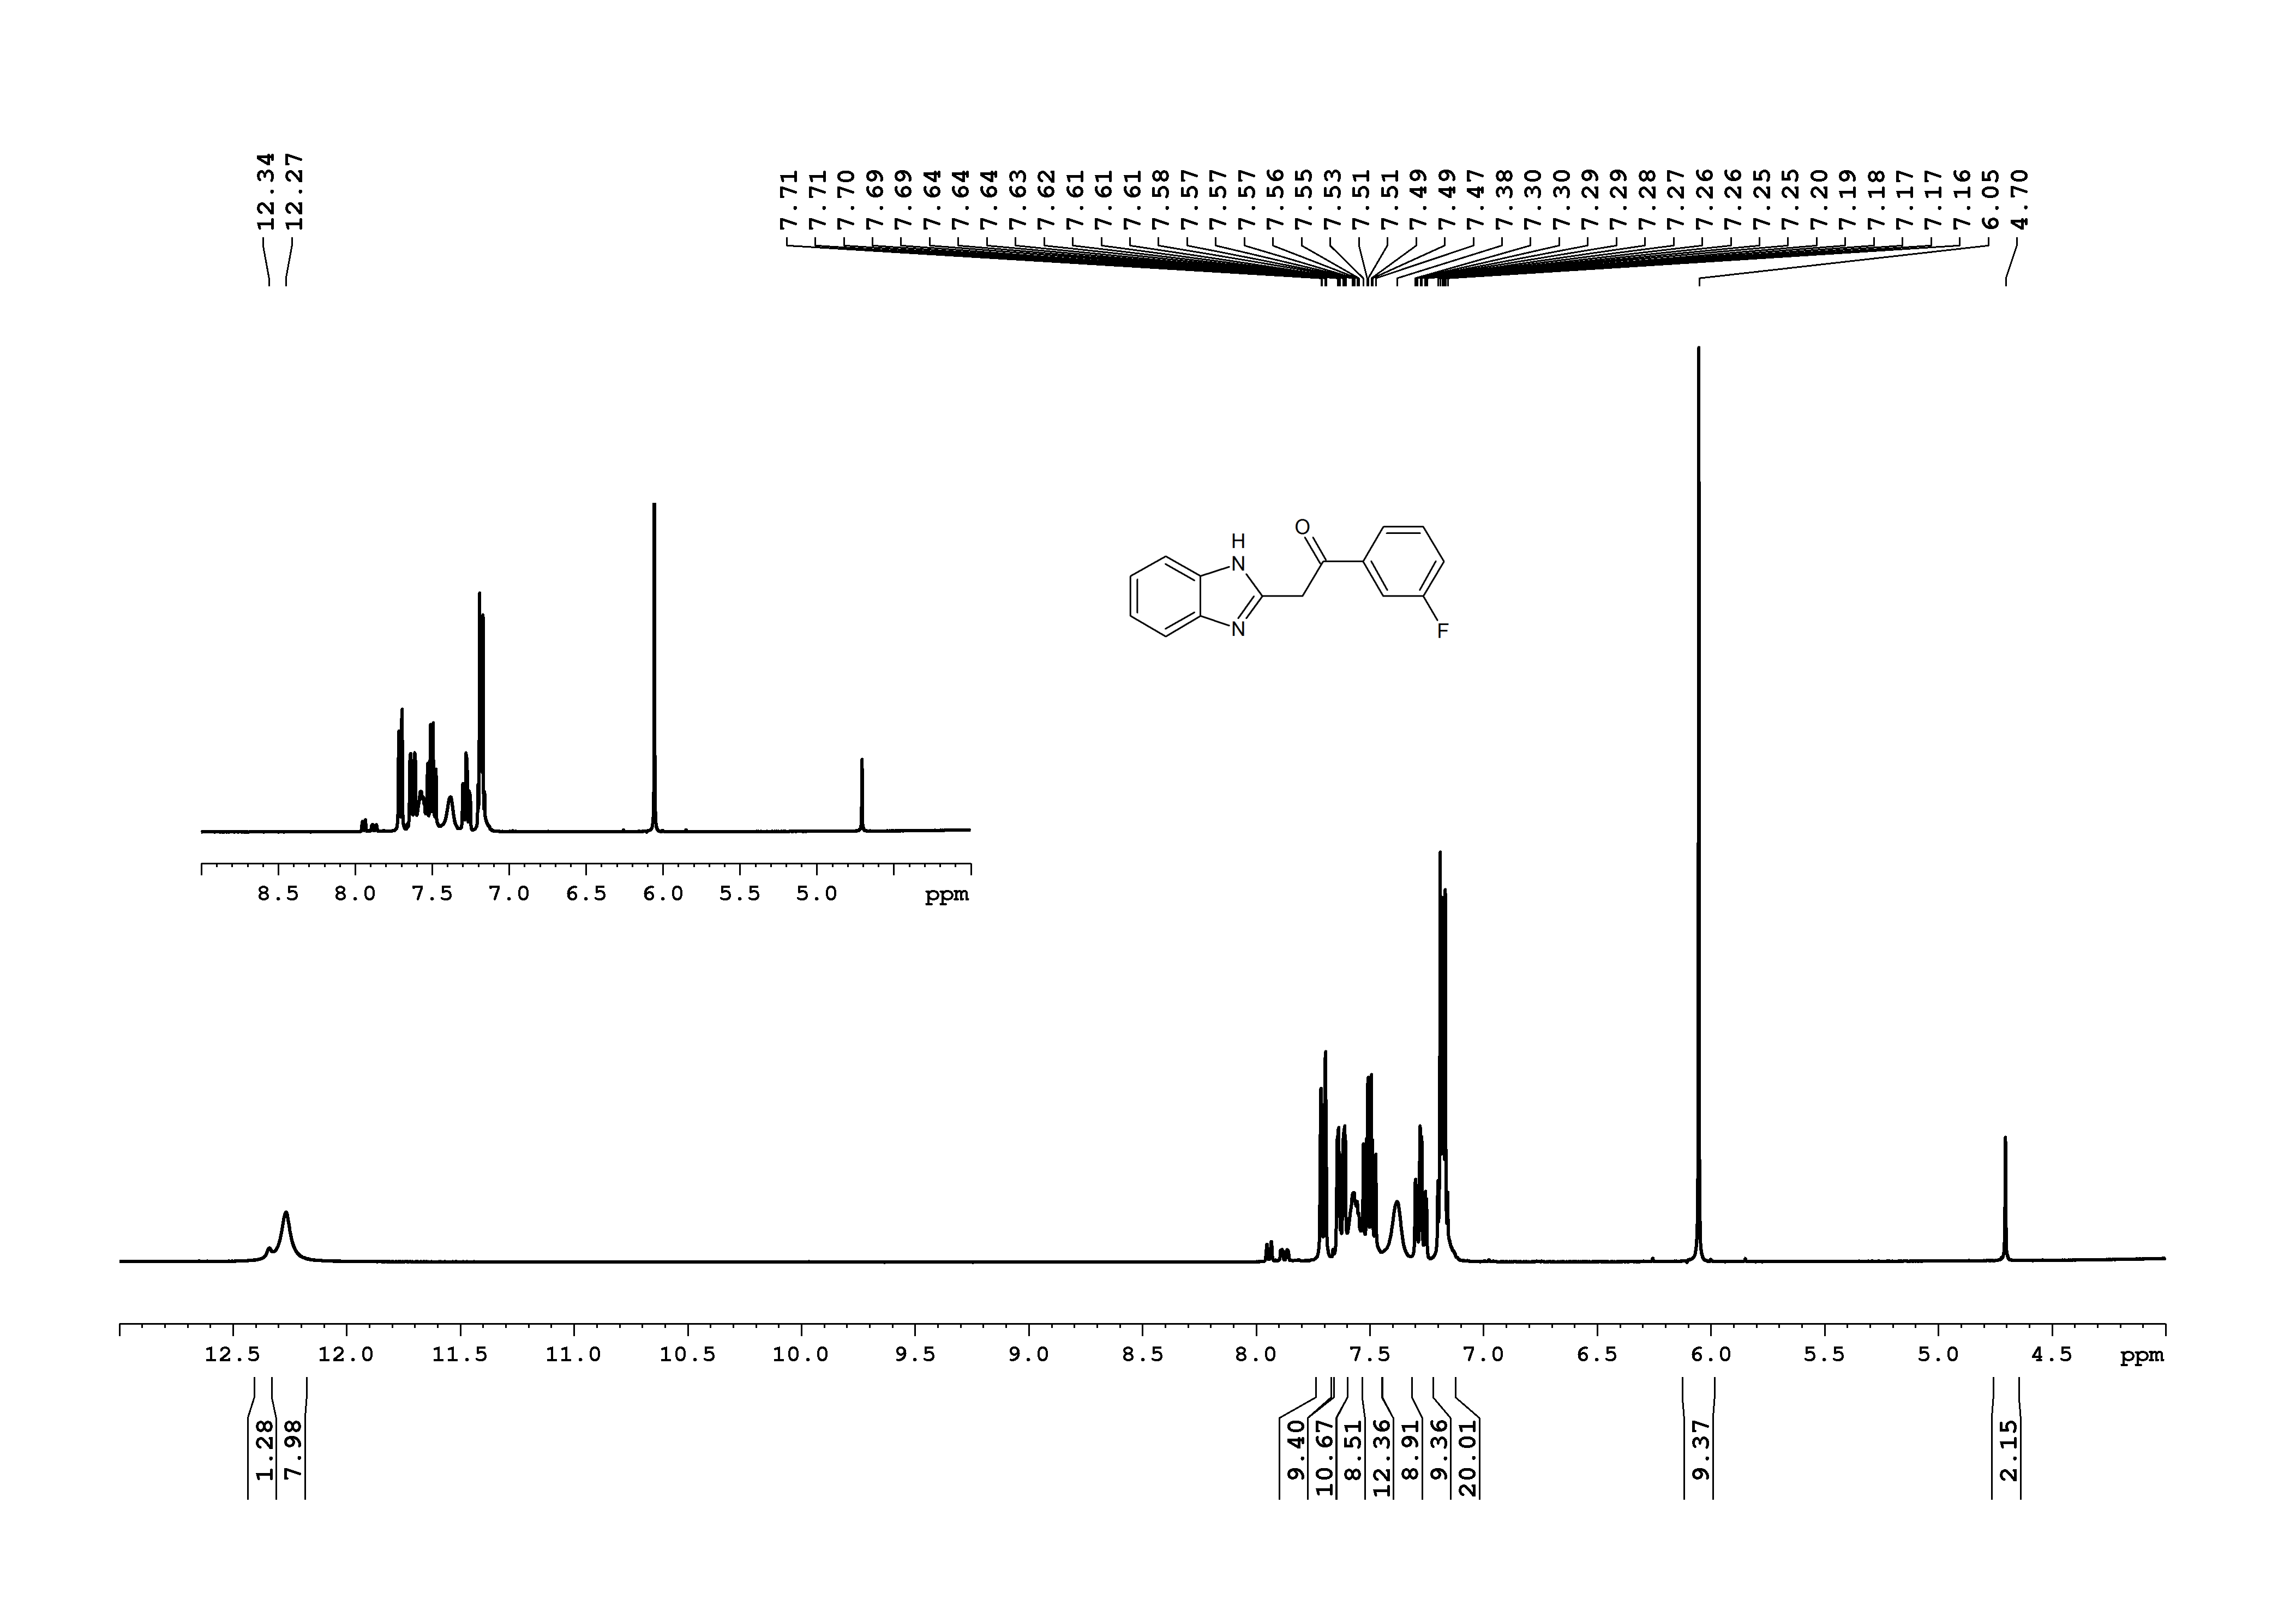


Figure 15. 1H NMR spectrum (400 MHz) of **2h** in DMSO-*d6*.


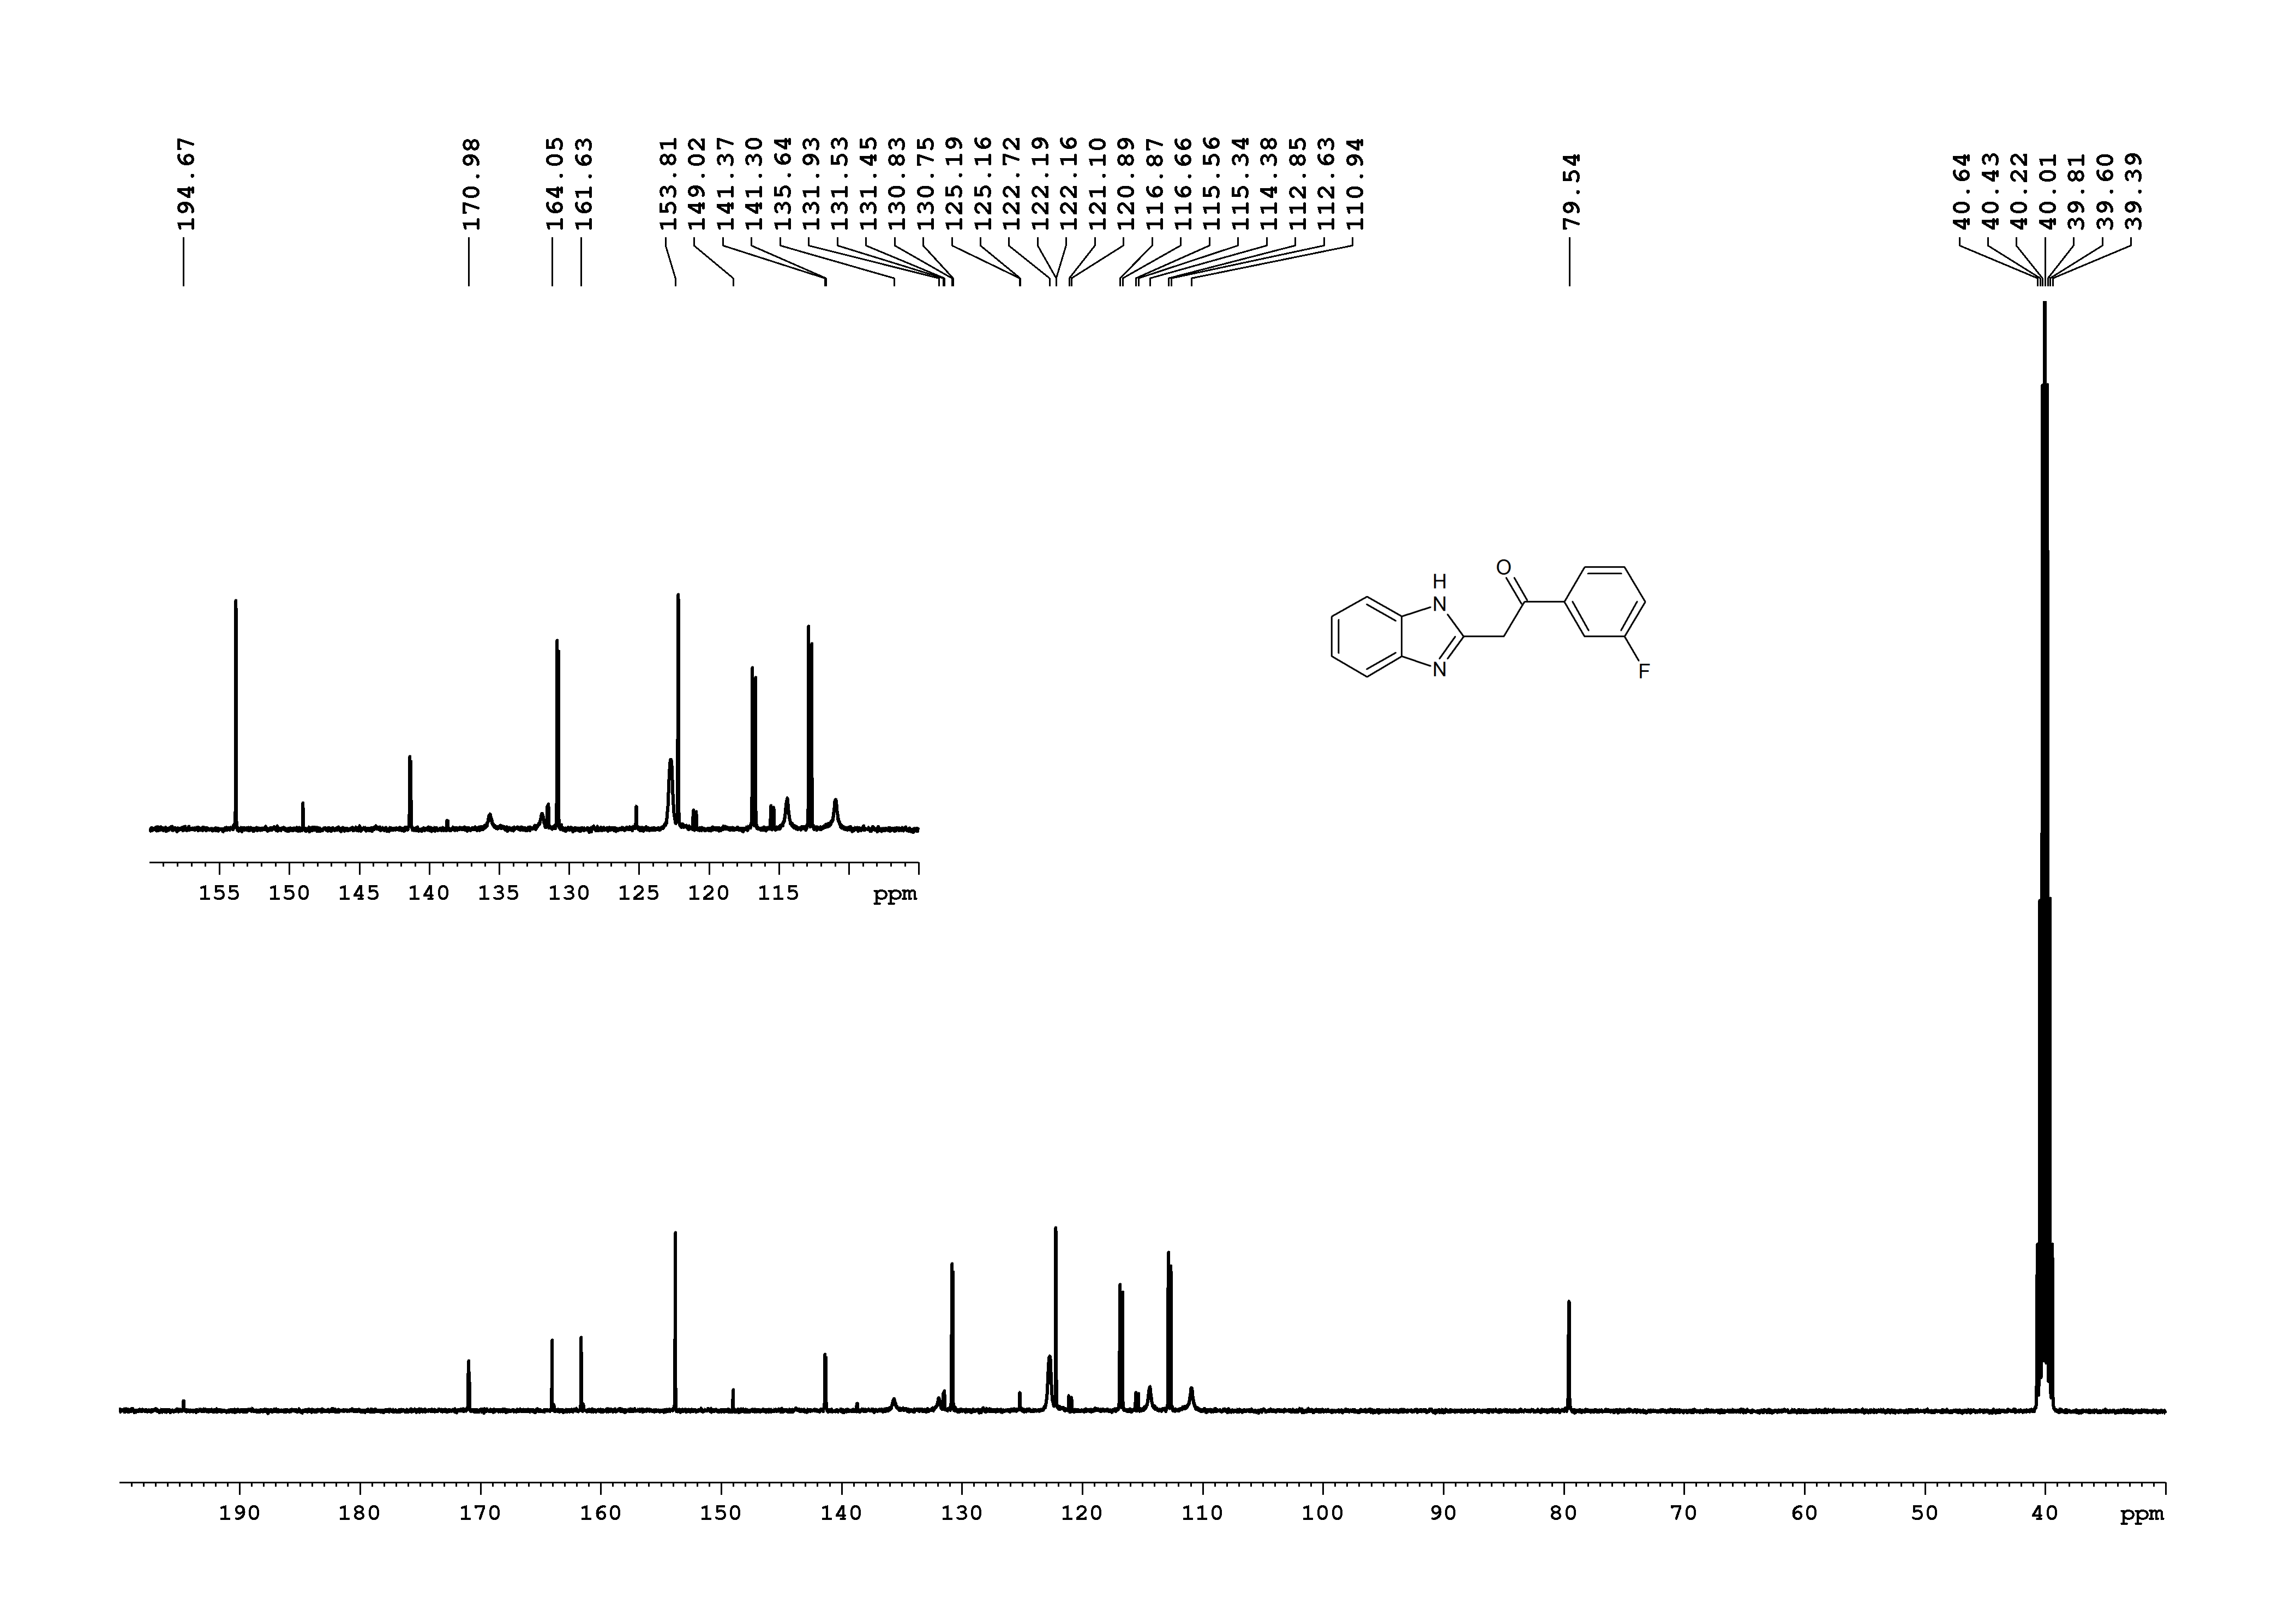


Figure 16. 13C NMR spectrum (400 MHz) of **2h** in DMSO-*d6*.


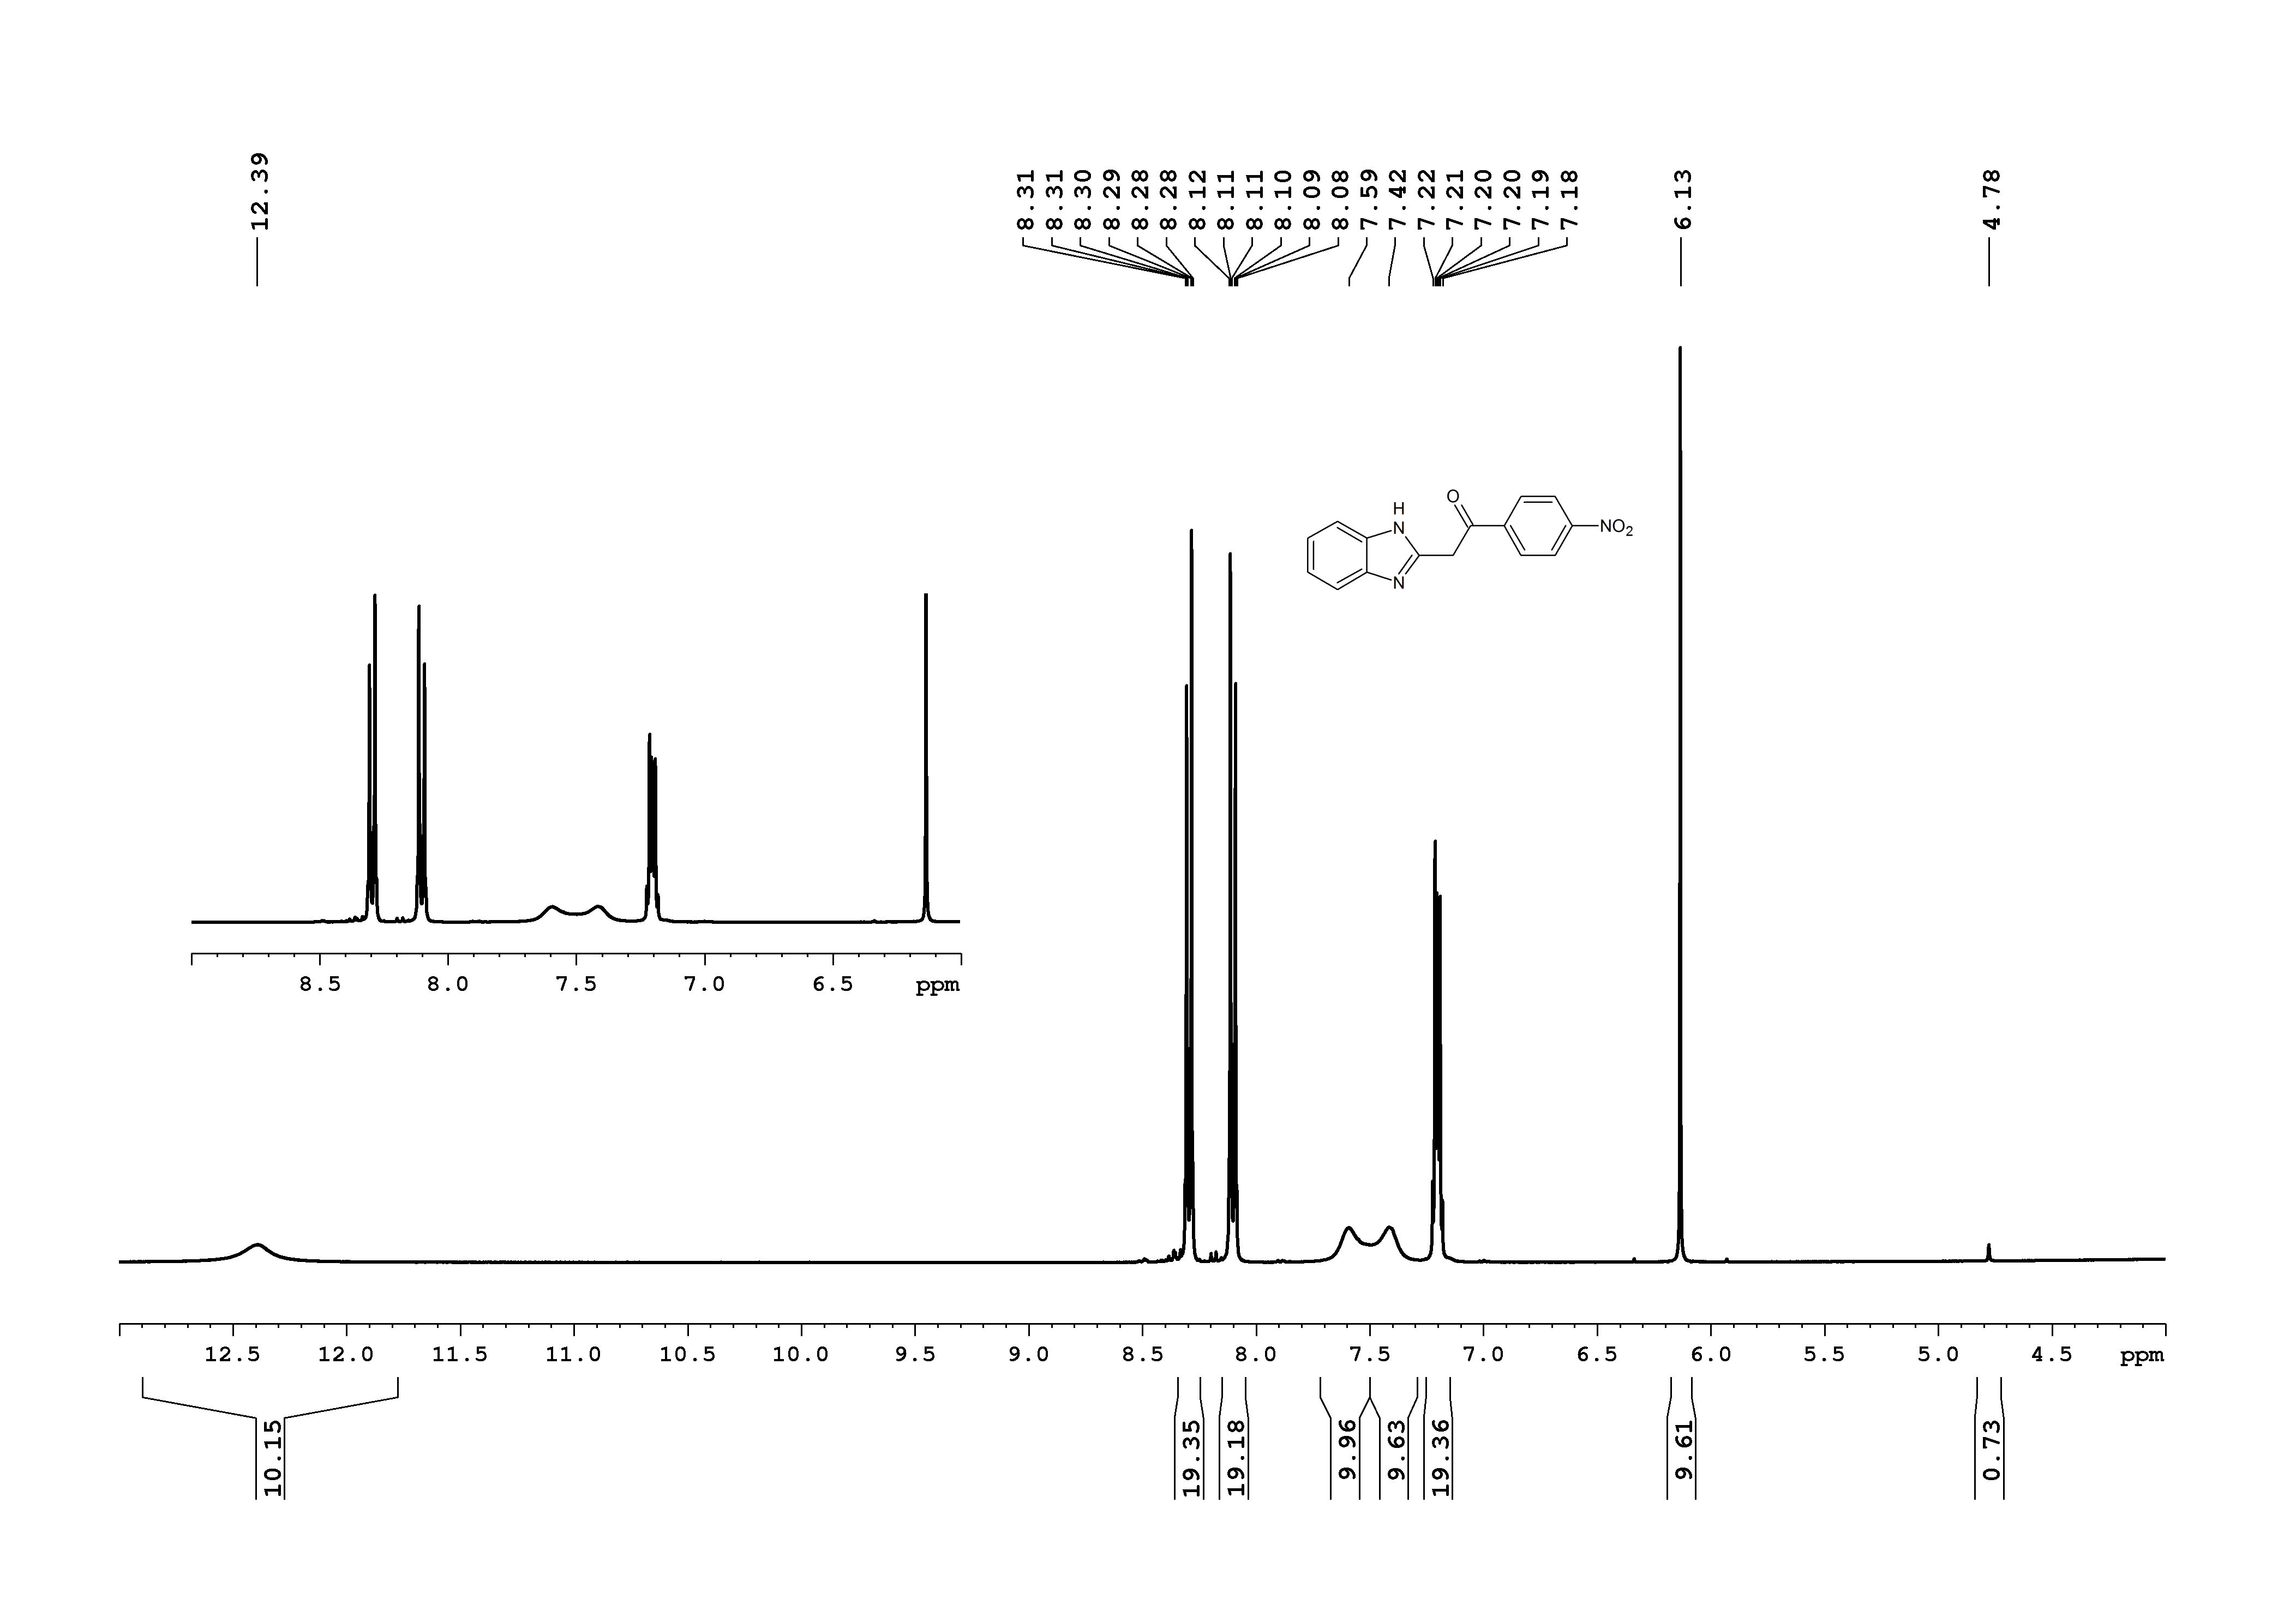


Figure 17. 1H NMR spectrum (400 MHz) of **2i** in DMSO-*d6*.


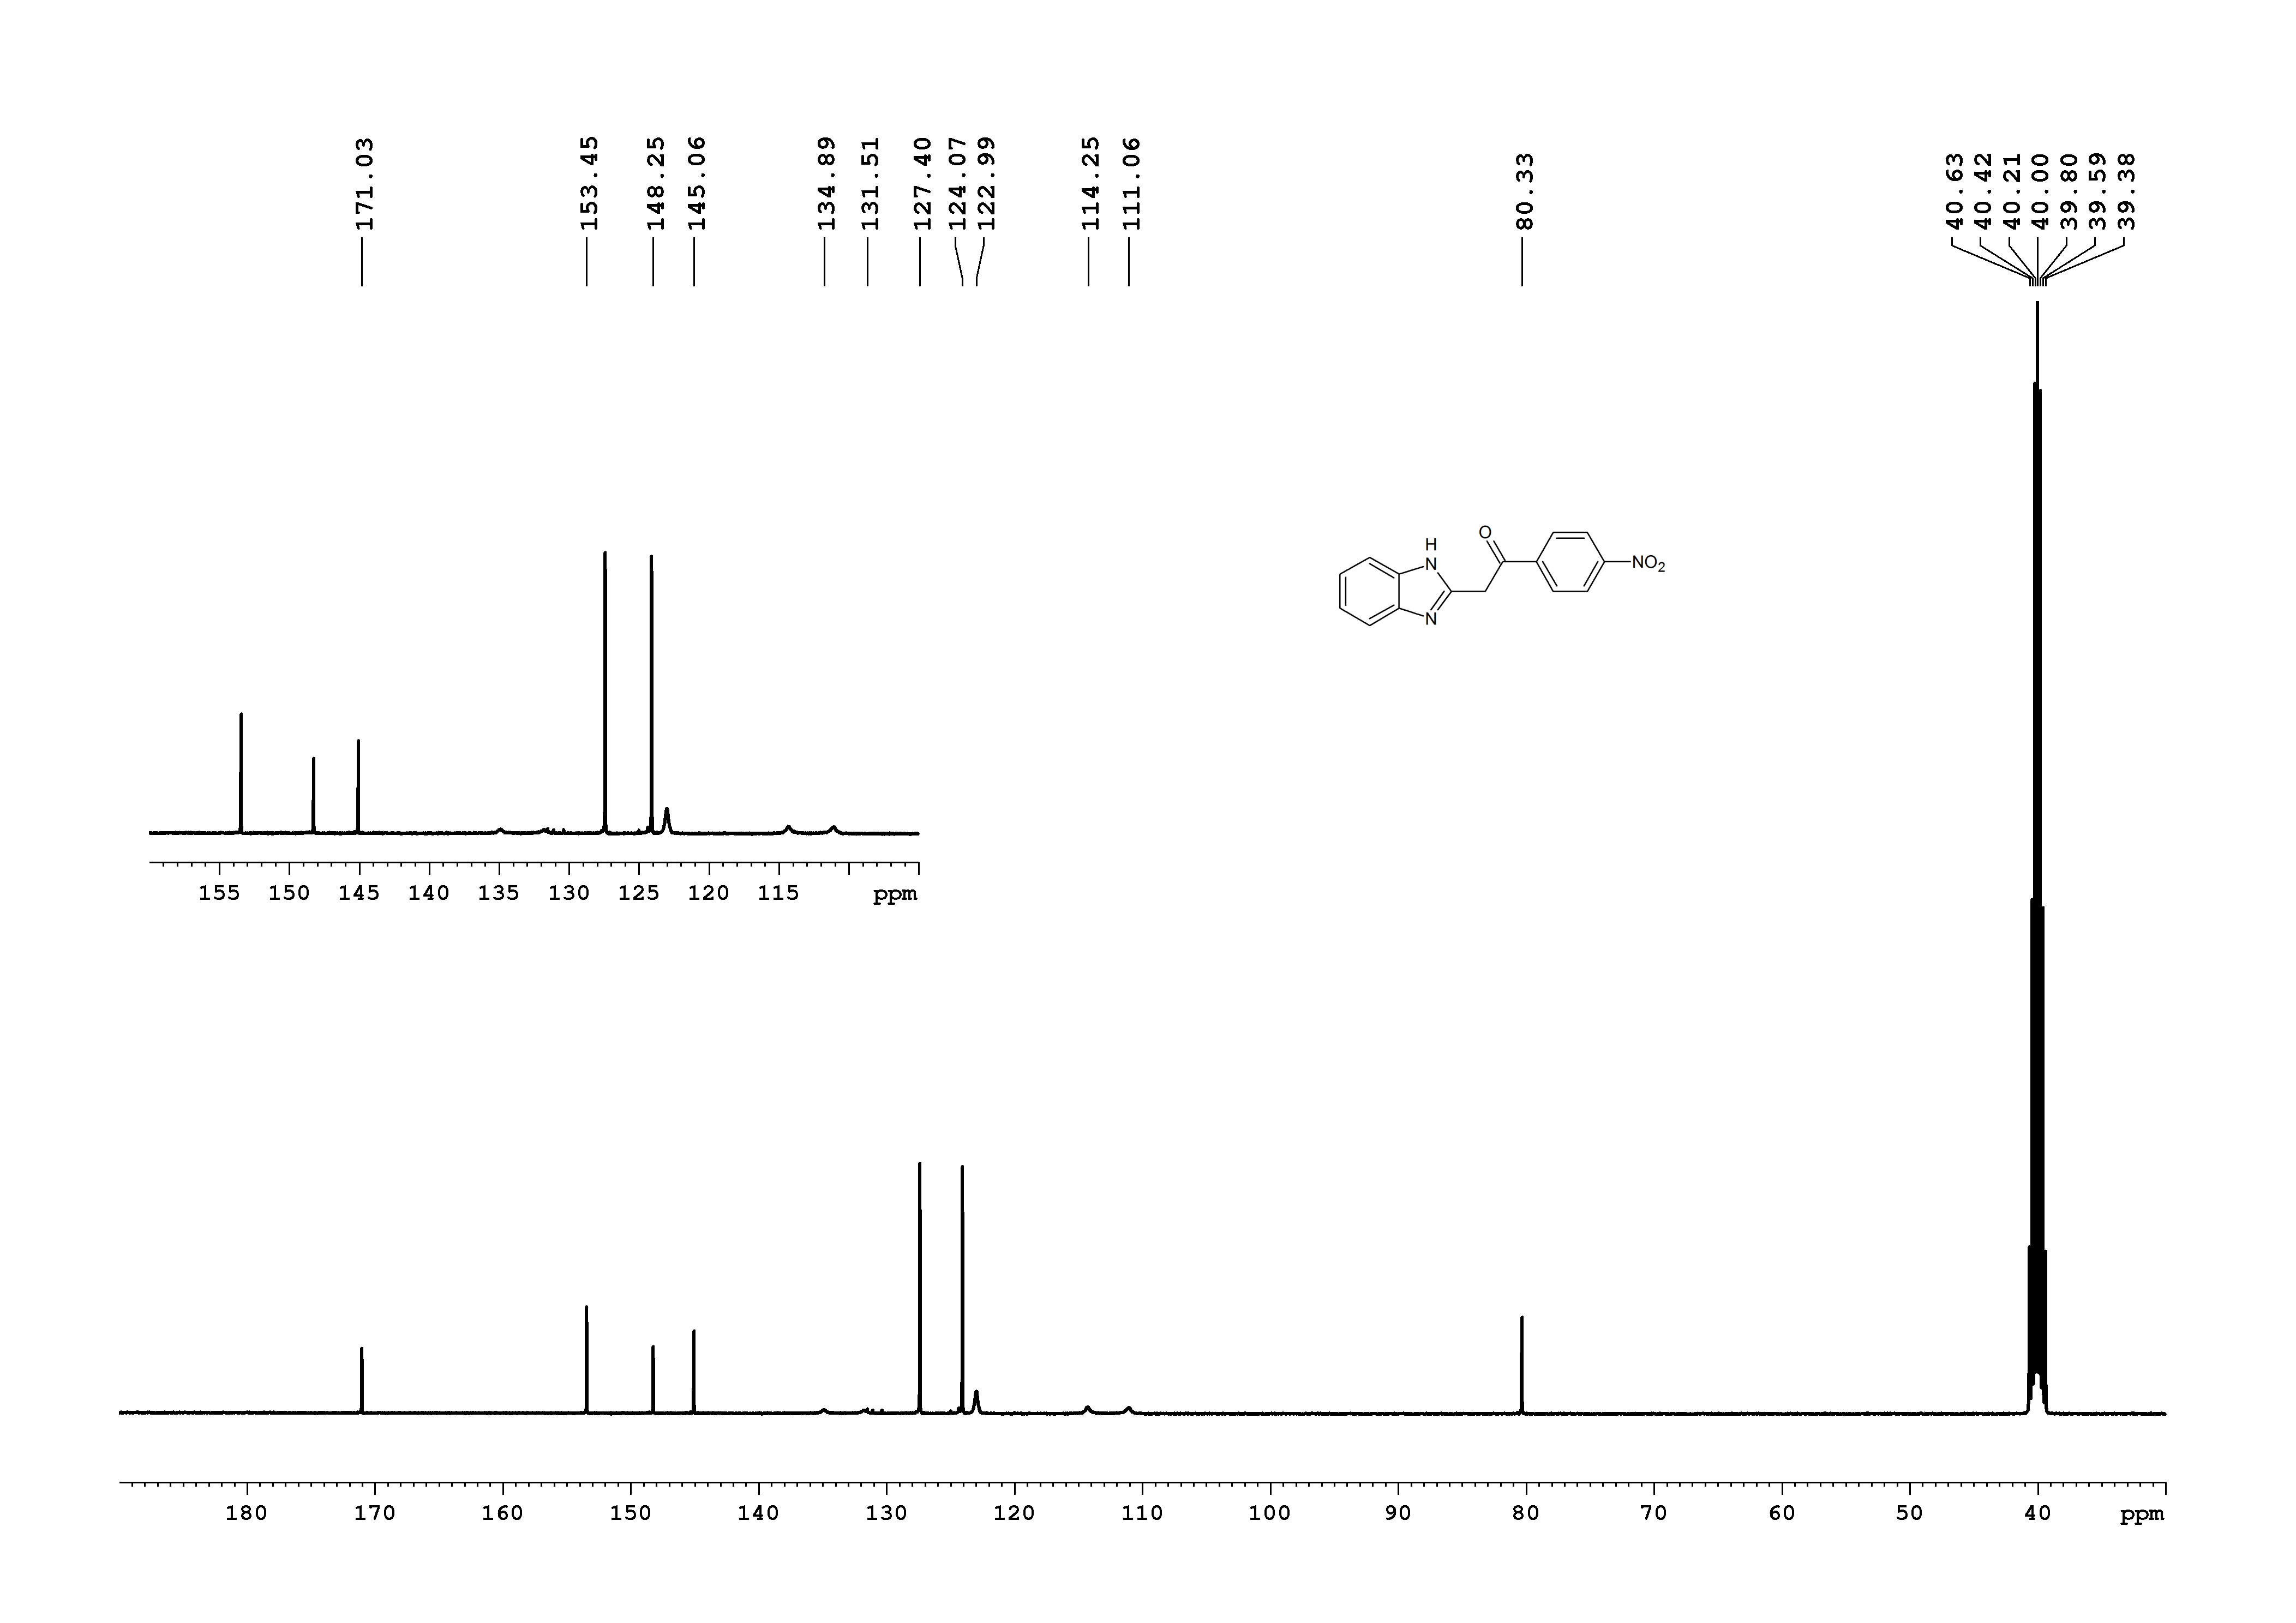


Figure 18. 13C NMR spectrum (400 MHz) of **2i** in DMSO-*d6*.

| 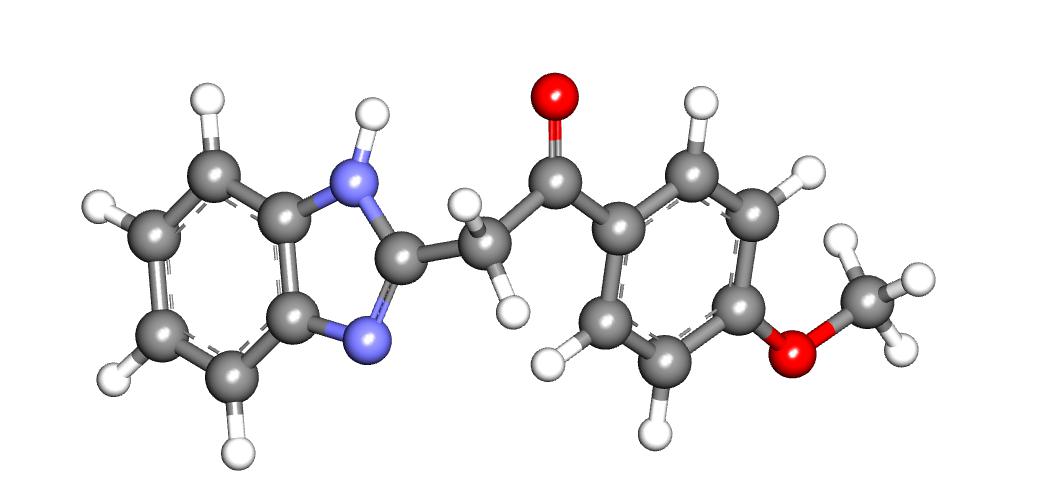 |
| --- |
| Compound **2a**, ketimine form **K** |

Cartesian coordinates

C -3.68900200 0.22392500 0.75282600

C -2.68742100 1.19692200 0.72568900

C -3.59088900 -0.89517900 -0.09173200

C -2.49153400 -1.02095900 -0.95822900

C -1.50461500 -0.04093000 -0.99270300

C -1.59431800 1.08299200 -0.14572500

C -0.54344200 2.13308300 -0.11147400

O -0.48121900 2.96615900 0.78866200

C 2.89222500 -0.56782100 -0.67362900

C 3.62263900 -1.74638000 -0.90459500

C 4.50112400 -2.17198900 0.08960400

C 4.63294700 -1.46902600 1.31186600

C 3.91771900 -0.29829300 1.56330400

C 3.02834800 0.11722000 0.56278900

N 2.18126200 1.20038000 0.45125500

H -4.52700600 0.34602100 1.42968200

H -2.74733900 2.06141400 1.38124600

H -2.43235600 -1.89981500 -1.59383800

H -0.65347400 -0.17330900 -1.65475400

H 3.51916700 -2.28051900 -1.84503700

H 5.08236500 -3.07763200 -0.06120000

H 5.32963000 -1.83538800 2.06114000

H 4.02391100 0.24053300 2.50108200

H 1.96651000 1.89234700 1.15874800

C 1.57049100 1.11694500 -0.77933300

C 0.53705500 2.11691800 -1.19033100

H 0.96473100 3.12346400 -1.23921300

H 0.15469100 1.83268300 -2.17236900

N 1.96392600 0.06875700 -1.48414600

O -4.50034300 -1.90425800 -0.14630400

C -5.61972600 -1.80974500 0.72617400

H -6.21655000 -2.70050900 0.53466500

H -5.30287700 -1.79855900 1.77464600

H -6.21483400 -0.91599900 0.50955300

| 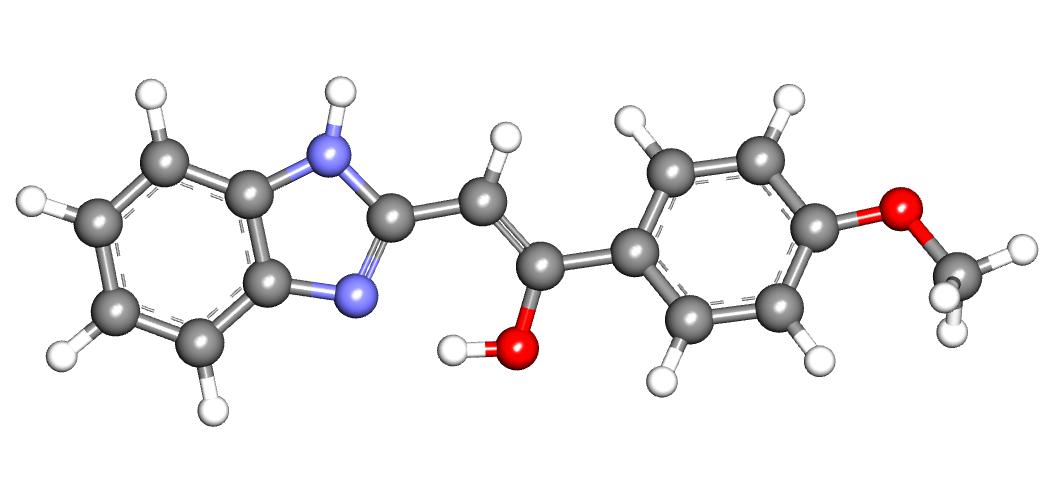 |
| --- |
| Compound **2a**, enolimine form **O** |

Cartesian coordinates

C 4.25625100 -0.93750500 0.31924500

C 2.86902300 -1.12021100 0.26834300

C 4.80892500 0.30165900 -0.03703100

C 3.96285900 1.34333400 -0.45341400

C 2.58545600 1.15337900 -0.50452300

C 2.01708800 -0.07921600 -0.12759400

C 0.56085700 -0.29267100 -0.14170300

O 0.19409500 -1.56219900 -0.38309700

C -3.95261600 0.81684200 0.18146300

C -5.26147500 1.31328000 0.24237100

C -6.29025000 0.37694700 0.13378600

C -6.02304900 -0.99502600 -0.08848700

C -4.71816800 -1.47918600 -0.16138700

C -3.66796800 -0.55124600 -0.06191200

N -2.29996100 -0.75069100 -0.09324900

H 4.88330900 -1.76260300 0.63804900

H 2.44058700 -2.07870800 0.54549200

H 4.41276800 2.28572300 -0.75318400

H 1.94883800 1.95636200 -0.86707500

H -5.47063900 2.36601700 0.41308300

H -7.32176200 0.71473600 0.18502400

H -6.85621600 -1.68776200 -0.16891800

H -4.50777600 -2.53113400 -0.33312800

C -1.75393700 0.45576800 0.08408500

N -2.71724600 1.42968200 0.23688600

H -2.53572200 2.40530700 0.42562500

C -0.33794400 0.70861600 0.10980400

H 0.02502000 1.70058000 0.35162200

H -0.79692000 -1.59584000 -0.31966700

O 6.14145200 0.59247400 -0.02608700

C 7.01805700 -0.45496600 0.36475800

H 8.02235500 -0.03720800 0.30304900

H 6.81784100 -0.77642400 1.39295600

H 6.93572800 -1.31295800 -0.31172900

| 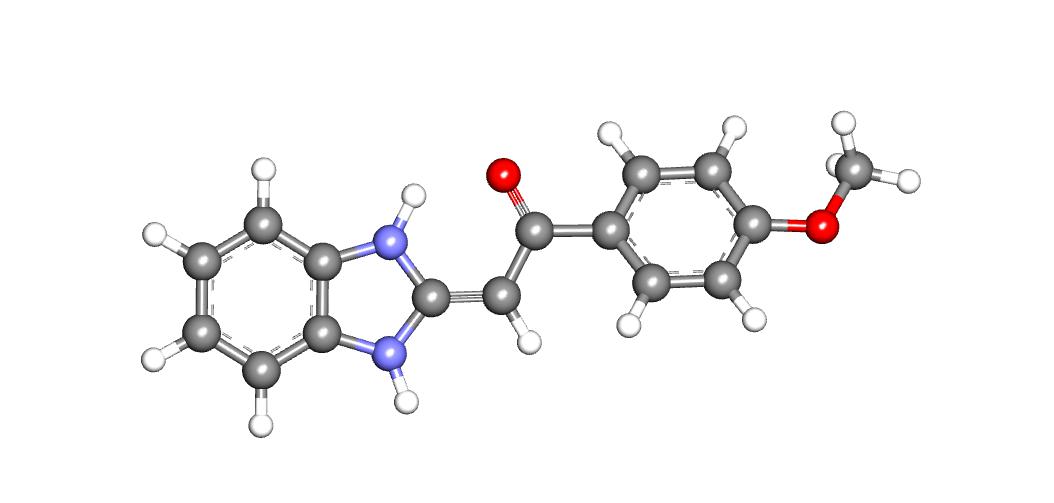 |
| --- |
| Compound **2a**, enaminone form **E** |

Cartesian coordinates

C 4.27388400 -0.93678900 0.34659000

C 2.88772300 -1.12844500 0.31275000

C 4.81406600 0.29223100 -0.06259400

C 3.95812500 1.31322800 -0.50693100

C 2.57951700 1.11528300 -0.52678600

C 2.02508800 -0.10929800 -0.10954700

C 0.55293300 -0.37241300 -0.11439200

O 0.14801200 -1.55242200 -0.28370500

C -3.94269000 0.81170500 0.17182000

C -5.24843400 1.28823100 0.29998200

C -6.28439200 0.36487600 0.11195700

C -6.01794700 -0.99585100 -0.13375600

C -4.70723000 -1.47263700 -0.25313400

C -3.67288100 -0.55385800 -0.06076700

N -2.29606800 -0.68131300 -0.11904000

H 4.91054700 -1.74416300 0.69114500

H 2.45979400 -2.07992600 0.61625800

H 4.39964600 2.24805200 -0.84136400

H 1.93426000 1.90699900 -0.89864300

H -5.45443700 2.33749200 0.49234900

H -7.31429300 0.69983500 0.19450800

H -6.84714800 -1.68394200 -0.27035400

H -4.49902700 -2.52082400 -0.44663100

H -1.66792900 -1.48652500 -0.24305300

C -1.69413300 0.52440100 0.09482900

O 6.14640500 0.59157300 -0.07442100

C 7.03178200 -0.43517400 0.34767100

H 8.03343100 -0.01499600 0.26151700

H 6.84264000 -0.71933900 1.38899300

H 6.94880200 -1.31904300 -0.29474000

N -2.70690400 1.43333900 0.30771400

H -2.55092200 2.42782400 0.37678200

C -0.32051100 0.73566800 0.11285100

H 0.06070000 1.72421800 0.33426100

| 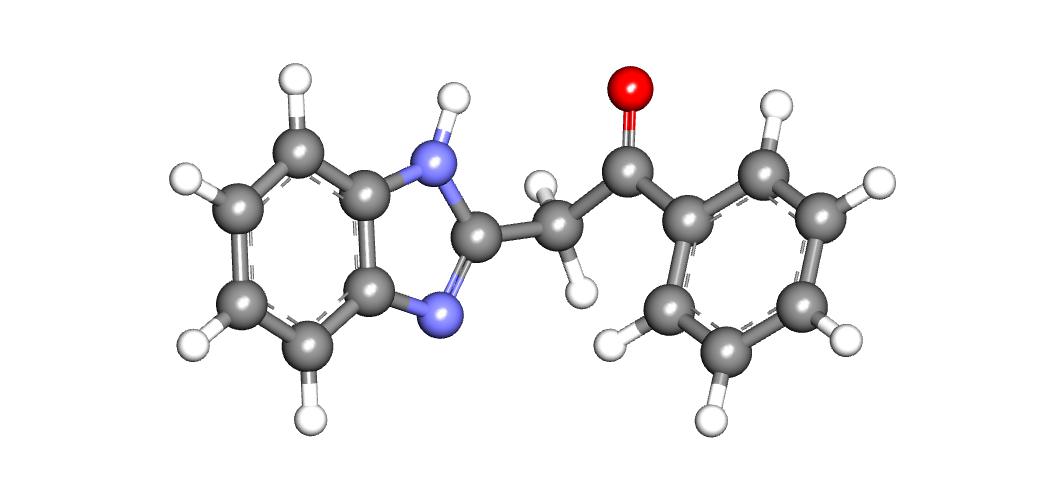 |
| --- |
| Compound **2d**, ketimine form **K** |

Cartesian coordinates

C -4.28373700 -0.76115300 -1.09156700

C -3.51630300 0.37370100 -0.82420700

C -3.95230300 -1.98974900 -0.50250000

C -2.85039900 -2.07858200 0.35655100

C -2.08509300 -0.94295000 0.64382200

C -2.41705500 0.28785000 0.04843700

C -1.60470900 1.51559400 0.28792600

O -1.68001700 2.49515500 -0.44678800

C 2.33415800 -0.42672400 0.64268000

C 3.30653500 -1.43924900 0.71410000

C 4.30974900 -1.44601800 -0.25262200

C 4.34141000 -0.48652300 -1.29373400

C 3.38732300 0.52665300 -1.38469300

C 2.37720000 0.52196800 -0.41296100

N 1.29651100 1.34708400 -0.17908200

H -5.13938300 -0.69171100 -1.75798000

H -3.75154600 1.33179600 -1.27902400

H -4.54756500 -2.87363600 -0.71624000

H -2.58574800 -3.03203100 0.80567000

H -1.22107200 -1.02831500 1.29713100

H 3.27859300 -2.17126100 1.51648800

H 5.07726700 -2.21460100 -0.22266200

H 5.14150200 -0.52796800 -2.02793800

H 3.41630400 1.26277900 -2.18361300

H 0.96839600 2.11313000 -0.75442100

C 0.65607800 0.87362600 0.94311000

C -0.60118300 1.51577500 1.43788200

H -0.95203900 0.95896200 2.30859900

H -0.42286900 2.55979000 1.71502600

N 1.24181300 -0.19186900 1.46478600

| 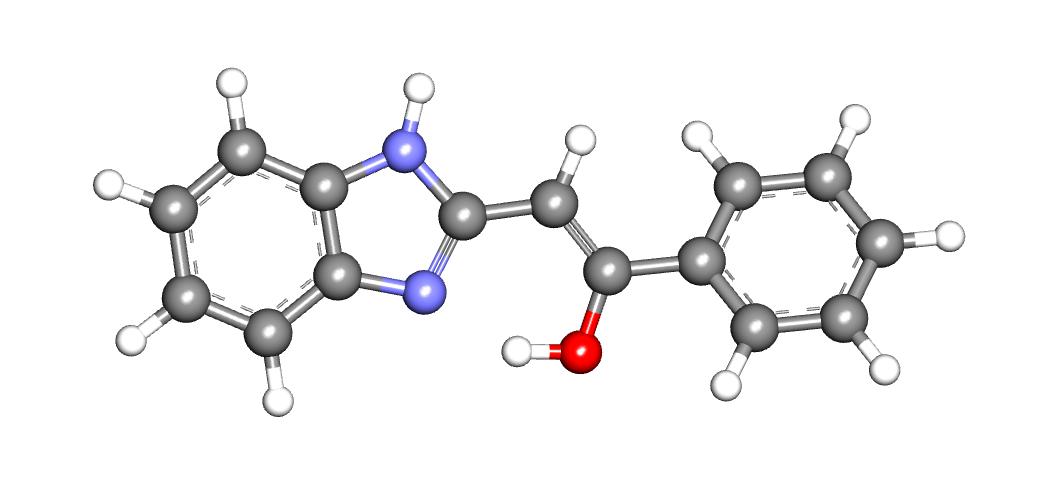 |
| --- |
| Compound **2d**, enolimine form **O** |

Cartesian coordinates

C -5.09672500 -0.94654600 -0.48766800

C -3.71427700 -1.13795400 -0.41093300

C -5.66668800 0.27029500 -0.09162600

C -4.84391300 1.29652600 0.38992600

C -3.46088900 1.11032500 0.47242400

C -2.88399300 -0.10250900 0.05494300

C -1.42489200 -0.30836500 0.09966000

O -1.05611300 -1.57831400 0.33126900

C 3.08435300 0.82989700 -0.15828300

C 4.39136000 1.33229700 -0.20967600

C 5.42314500 0.40102100 -0.08875900

C 5.16037100 -0.97179600 0.13429500

C 3.85742200 -1.46203000 0.19745900

C 2.80399400 -0.53931000 0.08384200

N 1.43671600 -0.74441600 0.10644700

H -5.73108300 -1.74841300 -0.85658800

H -3.26576300 -2.07855400 -0.71580500

H -5.28200200 2.23450700 0.72131200

H -2.83029500 1.89370900 0.88508800

H 4.59718800 2.38567200 -0.38034000

H 6.45351500 0.74331400 -0.13210500

H 5.99610700 -1.66010300 0.22507800

H 3.65039900 -2.51453400 0.36974100

C 0.88714900 0.45903800 -0.07988500

N 1.84681100 1.43726900 -0.22496600

H 1.66260700 2.41034700 -0.42428700

C -0.53025100 0.70334700 -0.12152500

H -0.89782100 1.69509300 -0.35750900

H -0.06348100 -1.60484200 0.28956900

H -6.74214800 0.41491900 -0.14985000

| 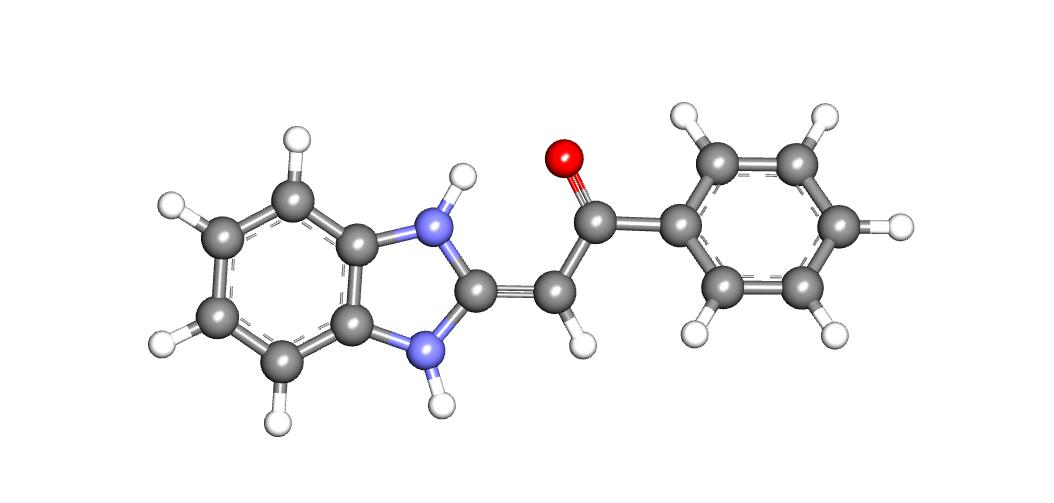 |
| --- |
| Compound **2d**, enaminone form **E** |

Cartesian coordinates

C -5.11697500 -0.94003100 -0.50036600

C -3.73462000 -1.13889500 -0.44684800

C -5.67480900 0.26341800 -0.04758600

C -4.84115700 1.26736900 0.46068200

C -3.45556700 1.07578800 0.50408700

C -2.89313100 -0.12647100 0.04295600

C -1.41697200 -0.38062500 0.07614300

O -1.01092000 -1.55969300 0.24930000

C 3.07467800 0.82331300 -0.14944500

C 4.38028900 1.30337500 -0.26622700

C 5.41679100 0.38257900 -0.07122000

C 5.15183900 -0.97928700 0.17131900

C 3.84153100 -1.45917700 0.28043600

C 2.80657100 -0.54296400 0.07975600

N 1.42965900 -0.67397900 0.12823300

H -5.76170800 -1.72290800 -0.89195700

H -3.28711800 -2.07105300 -0.78007800

H -5.27098000 2.19447800 0.83174400

H -2.81458500 1.84743400 0.92288600

H 4.58520900 2.35326400 -0.45614700

H 6.44643800 0.72021400 -0.14540800

H 5.98172400 -1.66532500 0.31368500

H 3.63429300 -2.50801800 0.47128100

H 0.80286900 -1.48248500 0.23850800

C 0.82690900 0.52913900 -0.09391100

N 1.83809300 1.44162800 -0.29322600

H 1.67939000 2.43481900 -0.37422600

C -0.54843200 0.73386200 -0.12848900

H -0.93363400 1.72024400 -0.35285000

H -6.75048000 0.41498100 -0.08460000

| 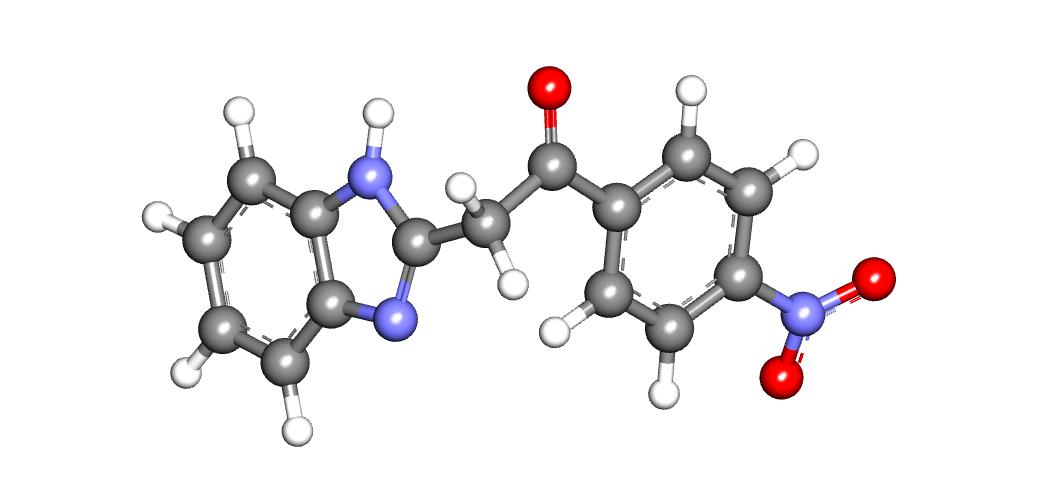 |
| --- |
| Compound **2i**, ketimine form **K** |

Cartesian coordinates

C 3.48258600 0.65084400 -0.82738600

C 2.42737500 1.55576600 -0.72630100

C 3.41657600 -0.52761700 -0.07997000

C 2.34536500 -0.82782500 0.76177500

C 1.30486900 0.09813300 0.87273400

C 1.33864500 1.29018900 0.12453200

C 0.22983200 2.29190100 0.18223100

O 0.12584100 3.17744500 -0.65904000

C -2.95711400 -0.69281100 0.64632000

C -3.55739700 -1.95317000 0.81101700

C -4.46239400 -2.37224200 -0.16142500

C -4.75296600 -1.57584500 -1.29593700

C -4.16916900 -0.32289500 -1.48020100

C -3.25333100 0.08775200 -0.50196300

N -2.50092900 1.23424800 -0.34353400

H 4.34054900 0.84070700 -1.46309300

H 2.43029600 2.47650700 -1.30238600

H 2.33310700 -1.76297600 1.31099400

H 0.45980200 -0.13137700 1.51567500

H -3.33288600 -2.55873200 1.68460100

H -4.94491600 -3.34061700 -0.06178300

H -5.46508200 -1.94124100 -2.03086900

H -4.39640300 0.28615800 -2.35098900

H -2.42507000 2.01304300 -0.98605200

C -1.79726000 1.10183600 0.83121200

C -0.82462100 2.14940000 1.27353100

H -1.31470100 3.12170200 1.38556900

H -0.40037900 1.84020200 2.23103900

N -2.03475400 -0.04225200 1.45245700

N 4.52367500 -1.49573600 -0.18864000

O 4.28999900 -2.66057000 0.13708900

O 5.60588200 -1.07158500 -0.59751100

| 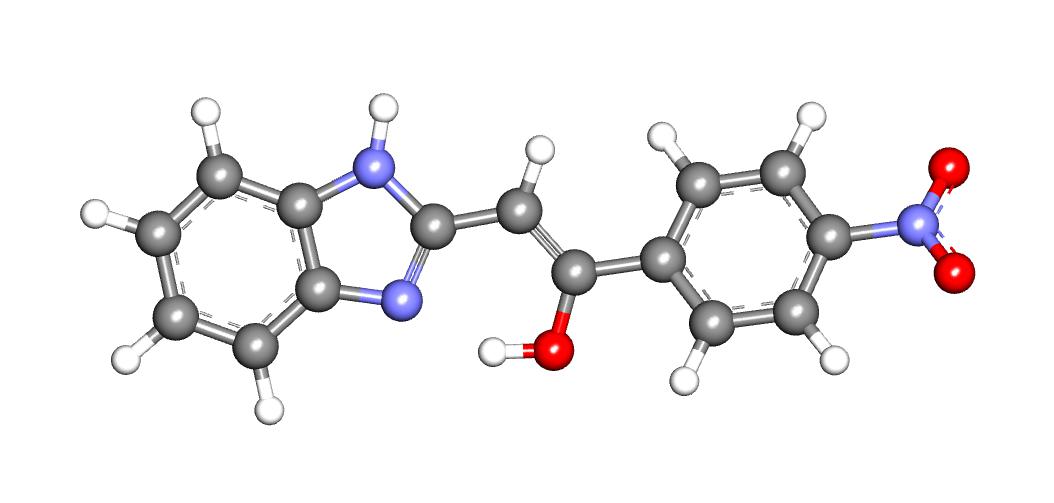 |
| --- |
| Compound **2i**, enolimine form **O** |

Cartesian coordinates

C -3.93451600 1.18074700 0.32269000

C -2.54734700 1.31000400 0.24842100

C -4.50644600 -0.05528300 0.01715800

C -3.74058200 -1.15874500 -0.36325100

C -2.35478200 -1.01481300 -0.42884200

C -1.74224700 0.21080600 -0.10641100

C -0.27884100 0.37077400 -0.14591200

O 0.12587300 1.62004600 -0.42129000

C 4.19529000 -0.85988700 0.20658500

C 5.49083400 -1.38618000 0.29619500

C 6.54233300 -0.48184200 0.14823200

C 6.31081400 0.88564400 -0.13595300

C 5.01990400 1.39969300 -0.23573900

C 3.94653200 0.50338900 -0.09677300

N 2.58460300 0.73480300 -0.14254100

H -4.56776700 2.01256300 0.61140300

H -2.07394500 2.26062000 0.47240900

H -4.22863100 -2.09204800 -0.62189500

H -1.74724700 -1.85408400 -0.75583200

H 5.67291500 -2.43495400 0.51484700

H 7.56483800 -0.84240000 0.21923600

H 7.16186800 1.55205000 -0.24507700

H 4.83695300 2.44793400 -0.45450400

C 2.00821200 -0.44893200 0.08897300

N 2.94496500 -1.43880700 0.28678000

H 2.74004500 -2.39989400 0.52177200

C 0.58508200 -0.65735400 0.12320400

H 0.19110300 -1.63018800 0.39313600

N -5.97080500 -0.19870600 0.08718800

O -6.47568100 -1.15895600 -0.49780700

O -6.59362800 0.65027200 0.72748700

H 1.12056800 1.62035400 -0.37405900

| 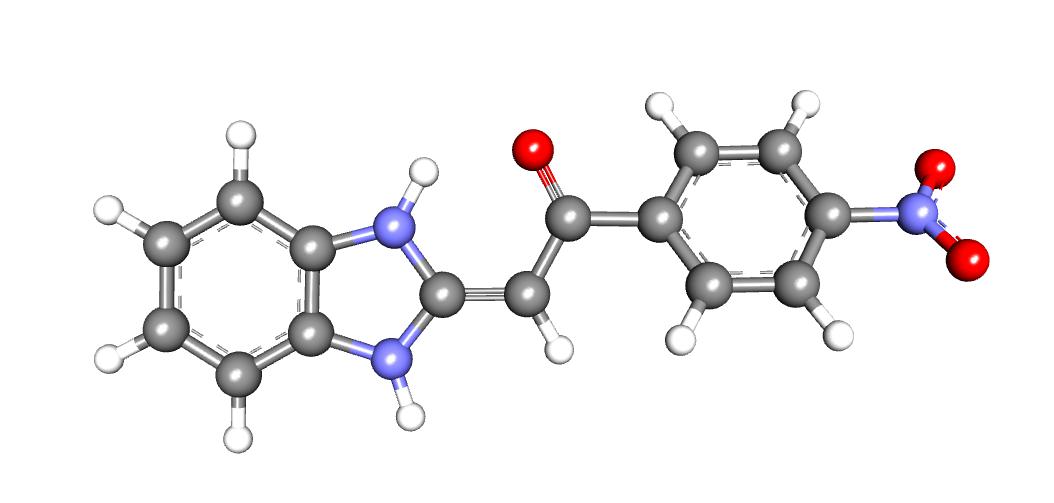 |
| --- |
| Compound **2i**, enaminone form **E** |

Cartesian coordinates

C -3.95052900 1.17599200 0.37636600

C -2.56382000 1.31454400 0.31047000

C -4.51299000 -0.04822600 0.00853300

C -3.74057900 -1.12881100 -0.41967300

C -2.35271300 -0.97666600 -0.45981100

C -1.75193500 0.23857300 -0.08838700

C -0.26777900 0.44711000 -0.13003400

O 0.16420100 1.60703300 -0.36611600

C 4.18582100 -0.85191100 0.20491100

C 5.47735600 -1.35766200 0.36634700

C 6.53773100 -0.47343700 0.13783900

C 6.31008400 0.87958700 -0.18294300

C 5.01497400 1.38546000 -0.33683300

C 3.95524800 0.50568100 -0.10162100

N 2.58213900 0.66612100 -0.17692100

H -4.59127100 1.98847100 0.70158400

H -2.08788400 2.25659600 0.56641800

H -4.22310300 -2.05227800 -0.72081000

H -1.73710700 -1.80167100 -0.80748300

H 5.65368200 -2.40030400 0.61521500

H 7.55771600 -0.83068600 0.24516800

H 7.15901900 1.53609200 -0.34969200

H 4.83683100 2.42697700 -0.58741600

H 1.97841300 1.48372000 -0.33763200

C 1.94928300 -0.50682000 0.10409500

N 2.93228800 -1.43185500 0.36026200

H 2.74745200 -2.41218700 0.51320000

C 0.56578800 -0.67575300 0.13675100

H 0.15584600 -1.63917900 0.41138100

N -5.97677000 -0.20267900 0.06460700

O -6.47675300 -1.12341400 -0.58491400

O -6.60605400 0.59855200 0.75832700
